# Supplementary material for: Design and synthesis of Tröger's base ditopic receptors: host–guest interactions, a combined theoretical and experimental study
Source: Royal Society of Chemistry journal article supplement (doi:10.1039/c4ob02266a), 2014-11-11
Supplement: c4ob02266a1.pdf [file c4ob02266a1.pdf]

## Supporting Information

### Design and Synthesis of Tröger's Base Ditopic Receptors: Host-Guest Interactions, a Combined Theoretical and Experimental Study

Manda Bhaskar Reddy,<sup>[a]</sup> Myadaraboina Shailaja,<sup>[a]</sup> Alla Manjula,<sup>\*,[a]</sup> Joseph Richard Premkumar,<sup>[b]</sup> Garikapati Narahari Sastry,<sup>\*,[b]</sup> Katukuri Sirisha,<sup>[c]</sup> and Akella Venkata Subramanya Sarma<sup>[c]</sup>

<sup>a</sup> Dr. A. Manjula, M. Bhaskar Reddy, M. Shailaja, Crop Protection Chemicals Division, CSIR-Indian Institute of Chemical Technology, Hyderabad, India, E-mail: manjula@iict.res.in.

<sup>b</sup> Dr. G. N. Sastry, J. R. Premkumar, Centre for Molecular Modelling, CSIR-Indian Institute of Chemical Technology, Hyderabad, India, E-mail: gnsastry@iict.res.in.

<sup>c</sup> Dr. A. V. S. Sarma, K. Sirisha, Centre for Nuclear Magnetic Resonance and Structural Chemistry, CSIR-Indian Institute of Chemical Technology, Hyderabad, India.

#### Table of Contents

|                                                                          |              |
|--------------------------------------------------------------------------|--------------|
| <b><sup>1</sup>H and <sup>13</sup>C NMR Spectra</b>                      | <b>2-5</b>   |
| <b>Optimized structures of complexes</b>                                 | <b>6-24</b>  |
| <b>Hydrogen bond distances and Binding Energies of various complexes</b> | <b>25-29</b> |

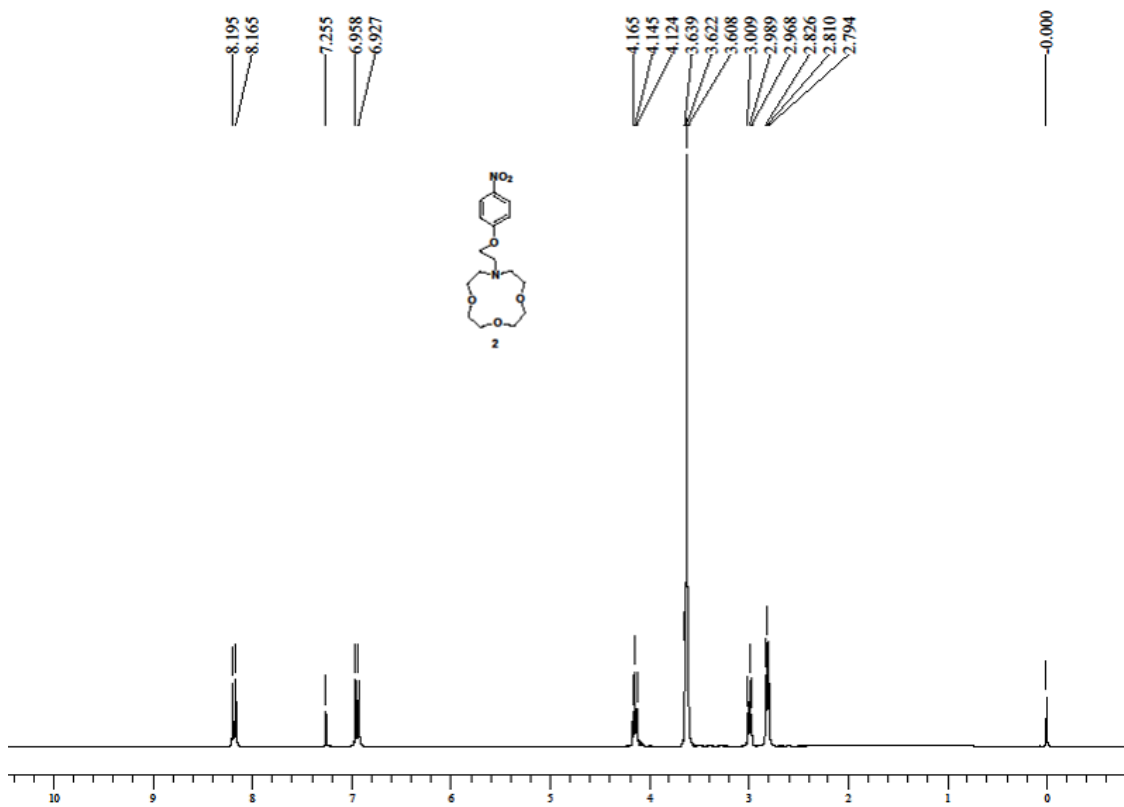

<sup>1</sup>H NMR spectra of 2 in CDCl<sub>3</sub>

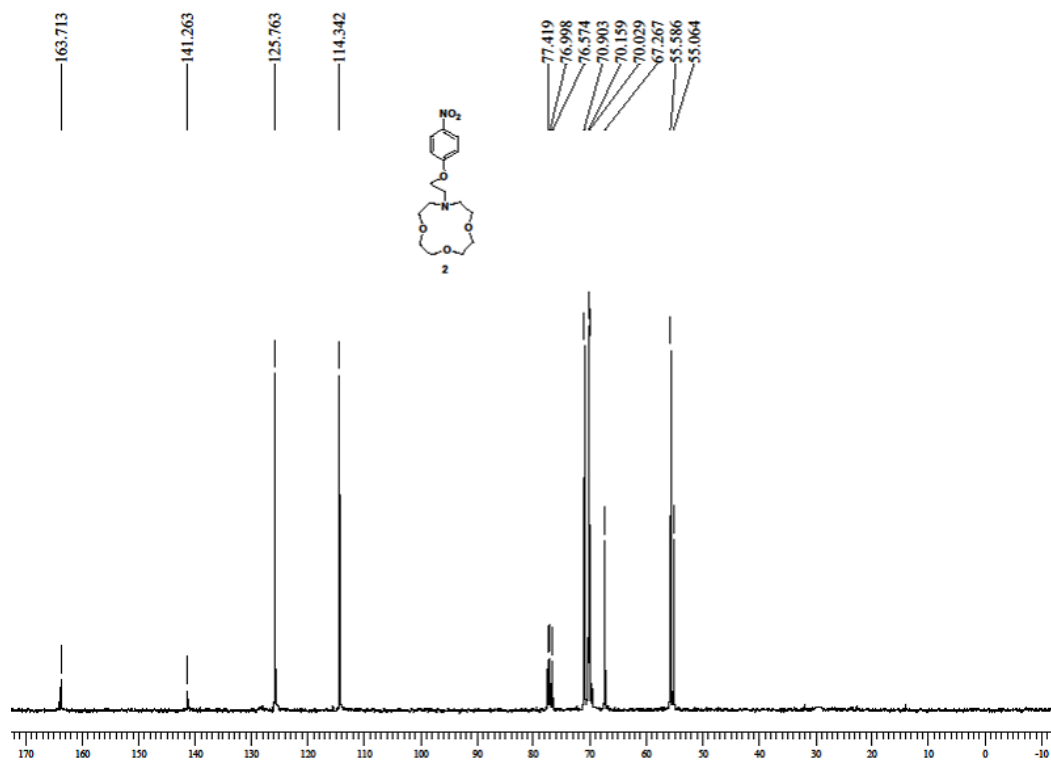

<sup>13</sup>C NMR spectra of 2 in CDCl<sub>3</sub>

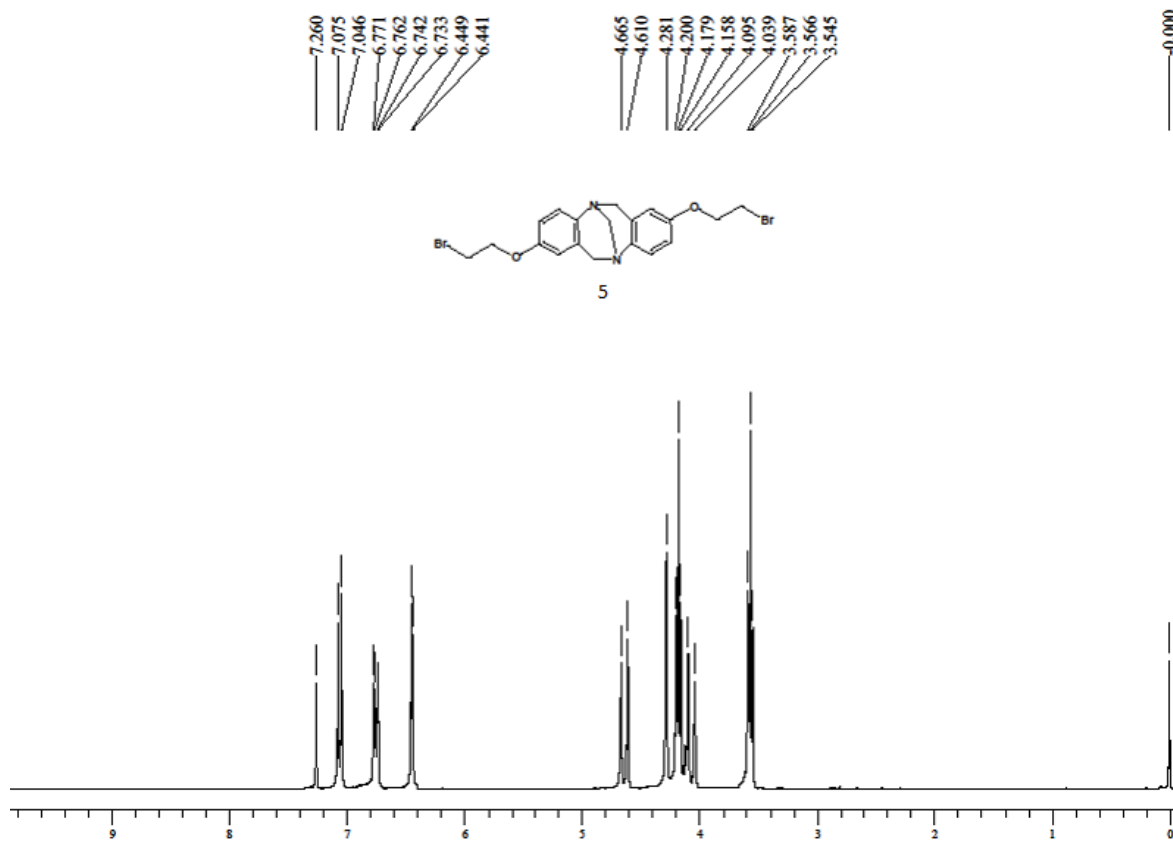

<sup>1</sup>H NMR spectra of 5 in CDCl<sub>3</sub>

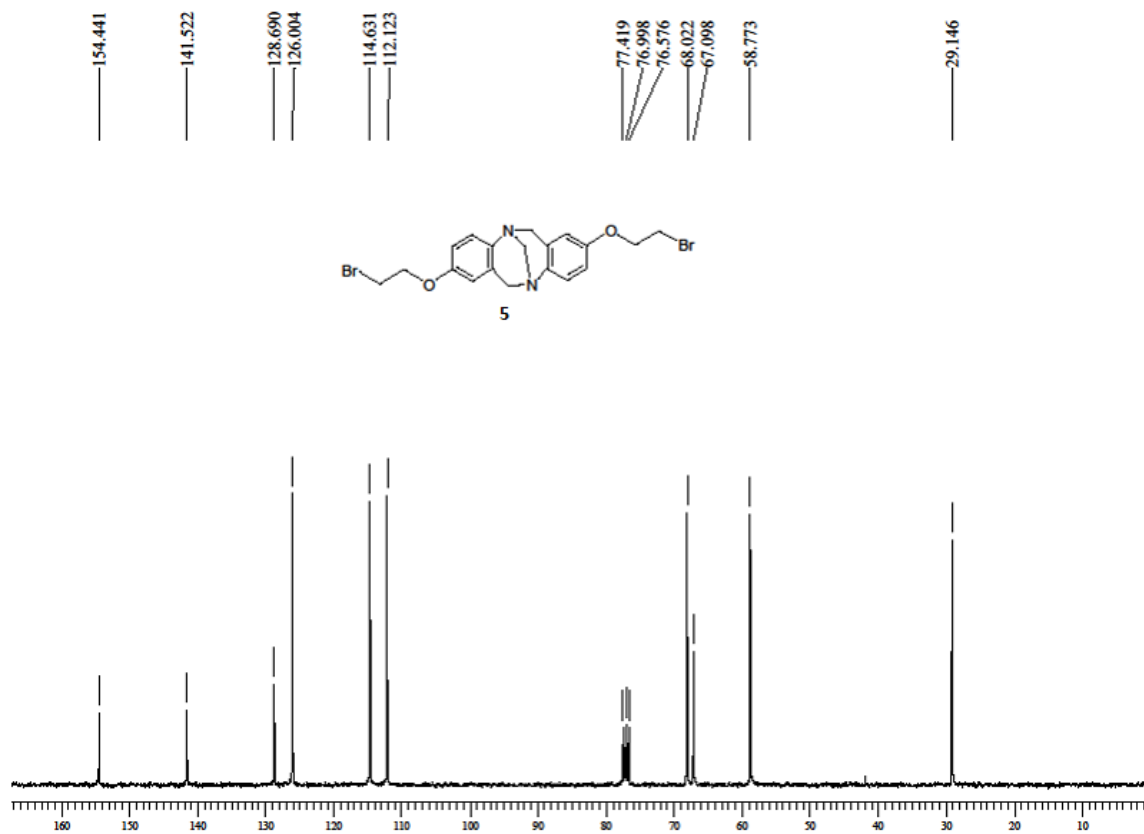

<sup>13</sup>C NMR spectra of 5 in CDCl<sub>3</sub>

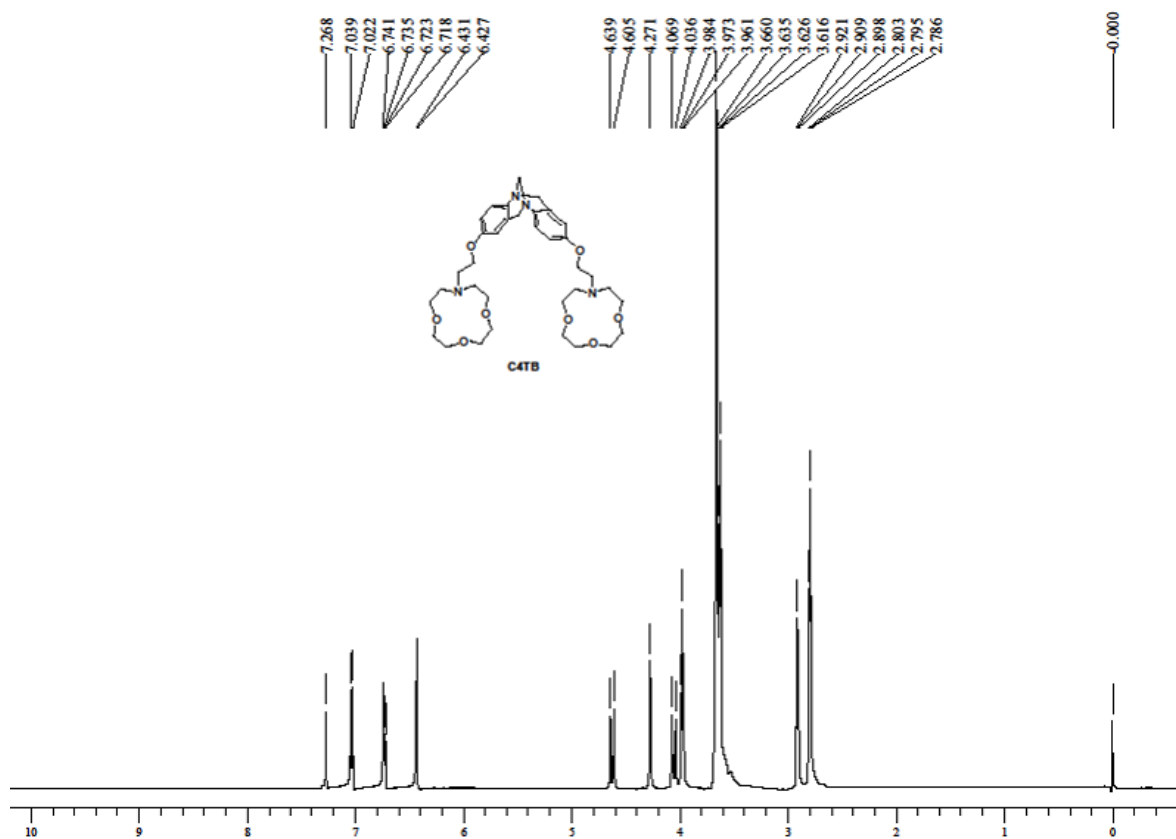

<sup>1</sup>H NMR spectra of C4TB in CDCl<sub>3</sub>

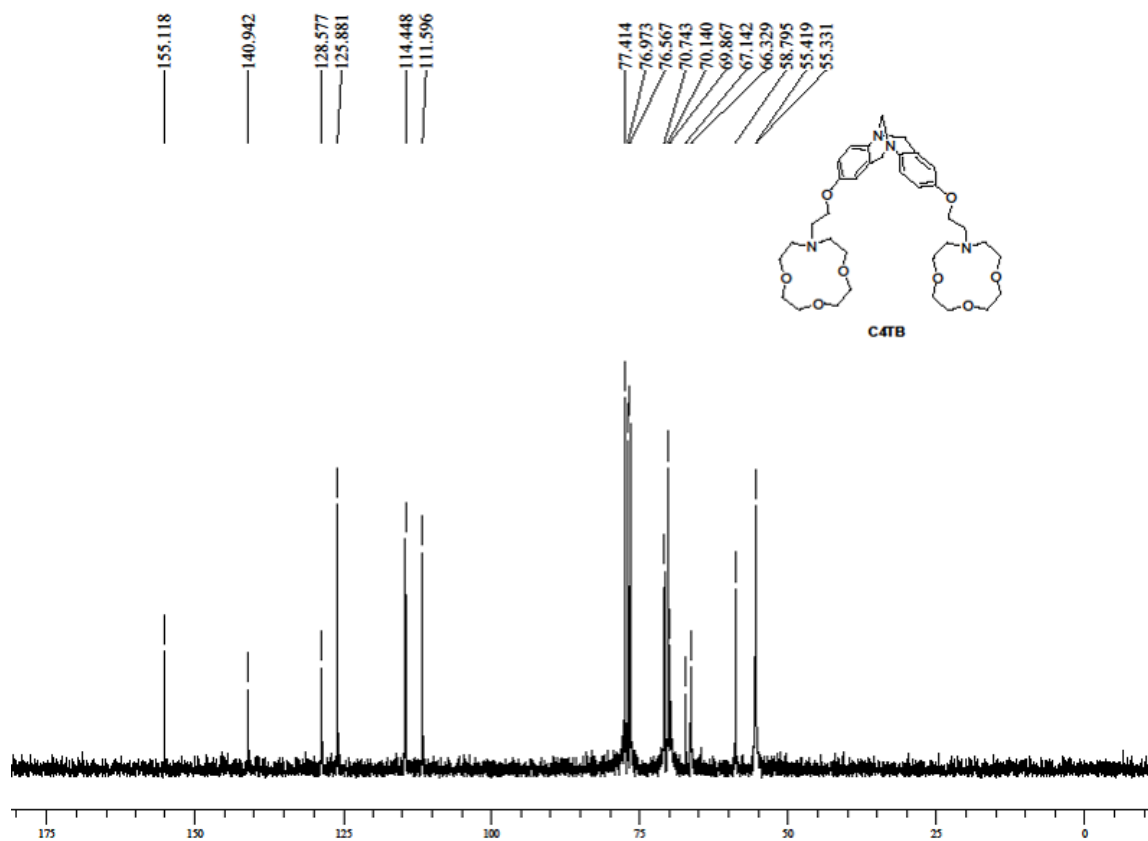

<sup>13</sup>C NMR spectra of C4TB in CDCl<sub>3</sub>

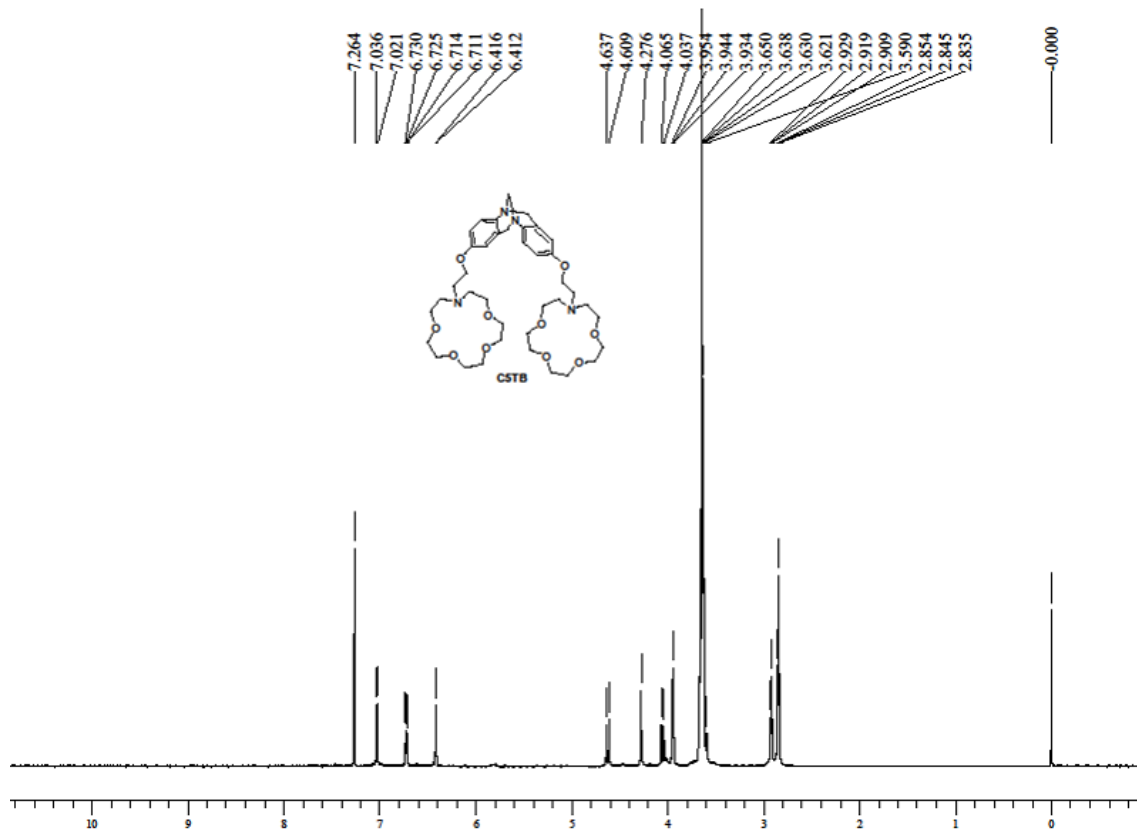

$^1\text{H}$  NMR spectra of C5TB in  $\text{CDCl}_3$

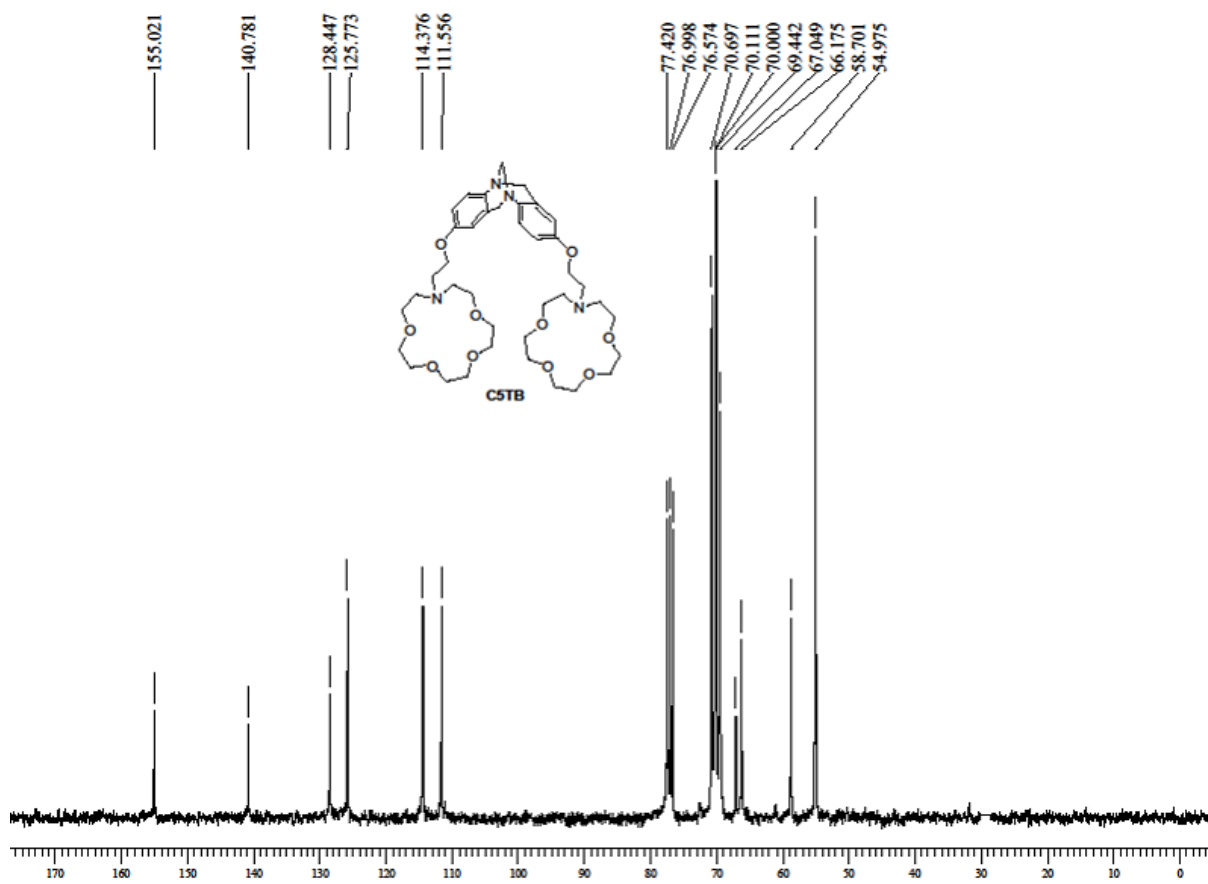

$^{13}\text{C}$  NMR spectra of C5TB in  $\text{CDCl}_3$

**Table S1.** The M06-2X/6-31G(d) structures of the host-guest complexes studied given in Bohr units. In the figure the hydrogen atoms of crown ethers removed for the clarity. The numbers in the figure shortest N...H and O...H hydrogen bond distances (Å).

| C4TB...A1 |               |               |              |  |
|-----------|---------------|---------------|--------------|--|
|           |               |               |              |  |
| 6         | 10.725512124  | -4.225654078  | -4.215167988 |  |
| 1         | 12.310347832  | -3.303770151  | -0.584860745 |  |
| 1         | 12.384370289  | -0.832267451  | -2.779095289 |  |
| 1         | 5.970986103   | 1.242447594   | -1.680004198 |  |
| 1         | 8.073559489   | 0.649353313   | -4.183441378 |  |
| 6         | 9.443251783   | 3.323837152   | -1.423320828 |  |
| 8         | 7.488402057   | -7.057079659  | 1.278135070  |  |
| 1         | 8.804254168   | -5.805385636  | 4.740130088  |  |
| 1         | 6.832164472   | -8.505271170  | 4.869684033  |  |
| 8         | 9.091248743   | -6.250402878  | -3.593340423 |  |
| 1         | 9.801498477   | -3.254100593  | -5.792503373 |  |
| 1         | 12.548188745  | -4.947340433  | -4.898834946 |  |
| 1         | 11.453098204  | 2.901812205   | -1.187229801 |  |
| 1         | 9.286132405   | 4.763311357   | -2.899926259 |  |
| 6         | 9.917333011   | -7.978829415  | 0.655793500  |  |
| 6         | 10.076109678  | -8.308841713  | -2.201099919 |  |
| 1         | 10.264806377  | -9.820029130  | 1.554532062  |  |
| 1         | 11.361161145  | -6.665713627  | 1.365693634  |  |
| 1         | 12.042995068  | -8.695721535  | -2.738409489 |  |
| 1         | 8.922350704   | -9.934960375  | -2.746170594 |  |
| 1         | -13.141437983 | -5.360381621  | -2.277688624 |  |
| 6         | -11.260066473 | -4.487556872  | -2.360216737 |  |
| 6         | -10.970150382 | -2.686190691  | -0.133063166 |  |
| 8         | -9.359646526  | -6.376496734  | -2.404028144 |  |
| 1         | -11.123034883 | -3.490921054  | -4.166777775 |  |
| 7         | -8.614990551  | -1.192027815  | -0.214687990 |  |
| 1         | -12.640719178 | -1.450139819  | -0.045209805 |  |
| 1         | -10.931146437 | -3.784701636  | 1.613472615  |  |
| 6         | -9.888233120  | -8.484958506  | -0.846427168 |  |
| 6         | -7.886482285  | -0.340199811  | 2.344877831  |  |
| 6         | -8.687389733  | 0.868542631   | -2.083073303 |  |
| 6         | -7.545133521  | -10.131595812 | -0.740555269 |  |
| 1         | -11.466490692 | -9.577441225  | -1.641363081 |  |
| 1         | -10.426978882 | -7.871566678  | 1.062203640  |  |
| 6         | -6.061184615  | -2.160193021  | 3.627761782  |  |
| 1         | -9.580757694  | -0.057139645  | 3.508348107  |  |
| 1         | -6.938454000  | 1.488556058   | 2.219349003  |  |
| 1         | -9.349330511  | 0.080980428   | -3.876411928 |  |
| 1         | -6.740002536  | 1.502804592   | -2.400783485 |  |
| 6         | -10.315420798 | 3.169695982   | -1.427561373 |  |
| 8         | -5.531048445  | -8.967819401  | 0.608047683  |  |
| 1         | -8.004246229  | -11.966024639 | 0.106969829  |  |
| 1         | -6.845541842  | -10.454992180 | -2.658591243 |  |
| 8         | -6.839678023  | -4.681495670  | 3.247441199  |  |
| 1         | -4.148402079  | -1.914264081  | 2.844489257  |  |
| 1         | -5.948904655  | -1.712106863  | 5.653442217  |  |
| 1         | -10.821920275 | 4.200617098   | -3.150003148 |  |
| 1         | -12.077117851 | 2.602492837   | -0.510671992 |  |
| 6         | -5.813912079  | -9.017411480  | 3.282818759  |  |
| 6         | -5.141504109  | -6.443714287  | 4.315489761  |  |
| 1         | -4.567055754  | -10.463083986 | 4.085761442  |  |
| 1         | -7.765437777  | -9.475826879  | 3.800021645  |  |
| 1         | -5.265581627  | -6.440329788  | 6.388139336  |  |
| 1         | -3.183188626  | -5.962059038  | 3.795796217  |  |
| 8         | 8.655950362   | 4.309026898   | 0.948311744  |  |
| 8         | -9.126875747  | 4.815261814   | 0.335171250  |  |
| 6         | 2.261293361   | -2.875446748  | -2.421366380 |  |
| 1         | 2.368578775   | -1.641489693  | -4.072794142 |  |
| 1         | 2.279595357   | -1.726153197  | -0.710529413 |  |
| 6         | -0.098804323  | -4.521158089  | -2.491662297 |  |
| 1         | -0.152965760  | -5.660893407  | -4.217796597 |  |
| 1         | -0.083590139  | -5.818727101  | -0.874748491 |  |
| 6         | -2.414432976  | -2.824032973  | -2.329136414 |  |
| 1         | -2.293721059  | -1.612493737  | -0.660803163 |  |
| 1         | -2.573693413  | -1.601848911  | -3.984504254 |  |
| 7         | -4.798025623  | -4.284764707  | -2.126508655 |  |
| 1         | -6.328756586  | -3.147748705  | -1.402781396 |  |
| 1         | -5.383559111  | -4.992230873  | -3.828547058 |  |
| 7         | 4.603678644   | -4.408468059  | -2.364444054 |  |
| 1         | 5.020998172   | -5.246657911  | -4.056007706 |  |
| 1         | 6.235364438   | -3.355134793  | -1.805257127 |  |
| 1         | 4.580673120   | -5.817854048  | -1.029012493 |  |
| 1         | -4.719392235  | -5.827916839  | -0.917161501 |  |
| 6         | 2.430883040   | 9.046314839   | 1.791987471  |  |
| 6         | 3.780459201   | 8.099019767   | 3.863102588  |  |
| 6         | 5.796507703   | 6.473760931   | 3.518860653  |  |
| 6         | 6.532822427   | 5.775403243   | 1.070193401  |  |
| 6         | 5.145495210   | 6.626133317   | -0.995806227 |  |
| 6         | 3.088721224   | 8.256292213   | -0.640845767 |  |
| 6         | -2.753141793  | 9.040851641   | -1.545164690 |  |
| 6         | -3.453914550  | 8.634815666   | 0.980779126  |  |
| 6         | -5.594609378  | 7.198368802   | 1.512296686  |  |
| 6         | -7.030101931  | 6.127200302   | -0.419897115 |  |
| 6         | -6.292129917  | 6.467541842   | -2.935972782 |  |
| 6         | -4.175408153  | 7.930677307   | -3.466133519 |  |
| 7         | 0.479593559   | 10.876108168  | 2.214004858  |  |
| 7         | -0.656298056  | 10.627664002  | -2.196940632 |  |
| 6         | -1.910335340  | 9.787544740   | 3.109381598  |  |
| 6         | -0.023944718  | 12.297639425  | -0.094628029 |  |
| 6         | 1.626504166   | 9.223404841   | -2.915369100 |  |
| 1         | 3.255088920   | 8.712757415   | 5.750855702  |  |
| 1         | 6.884708303   | 5.771449936   | 5.109554511  |  |
| 1         | 5.622753067   | 6.063097017   | -2.910990605 |  |
| 1         | -6.181460005  | 6.883464863   | 3.456828508  |  |
| 1         | -7.351610462  | 5.646903766   | -4.485105897 |  |
| 1         | -3.624534130  | 8.259710727   | -5.416886318 |  |
| 1         | -3.002948451  | 11.289051091  | 4.031388356  |  |
| 1         | -1.502594833  | 8.361440346   | 4.549872476  |  |
| 1         | -1.598492758  | 13.588779589  | 0.257930590  |  |
| 1         | 1.650101174   | 13.395158264  | -0.607416514 |  |
| 1         | 2.835702031   | 10.478876427  | -4.038321761 |  |
| 1         | 1.085469946   | 7.648699954   | -4.141508359 |  |
| 1         | 6.896109020   | -0.845174279  | 5.255396004  |  |
| 6         | 6.536418575   | -0.936255292  | 3.211984270  |  |
| 6         | 9.056479675   | -1.238465942  | 1.852687359  |  |
| 8         | 4.776717073   | -2.878237874  | 2.655250207  |  |
| 1         | 5.626969046   | 0.841062235   | 2.664848125  |  |
| 7         | 8.834708992   | -1.415981132  | -0.917231421 |  |
| 1         | 10.288975972  | 0.330084108   | 2.432462851  |  |
| 1         | 9.961352288   | -2.976165364  | 2.486764128  |  |
| 6         | 4.801738935   | -5.029479262  | 4.244203628  |  |
| 6         | 11.197134819  | -2.375676585  | -2.053878926 |  |
| 6         | 7.972398677   | 0.938260292   | -2.135785320 |  |
| 6         | 7.124983183   | -6.691859876  | 3.900577744  |  |
| 1         | 3.104075247   | -6.097565619  | 3.736281187  |  |
| 1         | 4.642905576   | -4.475814114  | 6.238639333  |  |

C4TB...A2

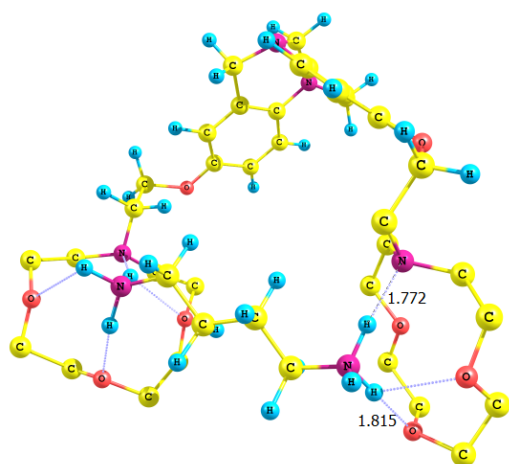

|   |              |              |              |
|---|--------------|--------------|--------------|
| 6 | 2.797939637  | 8.819731024  | 2.579530776  |
| 6 | 3.326112382  | 7.661669143  | 4.902228894  |
| 6 | 5.147668395  | 5.797297608  | 5.093283971  |
| 6 | 6.521383915  | 5.063755112  | 2.949605265  |
| 6 | 5.963756012  | 6.150629125  | 0.620697508  |
| 6 | 4.093717189  | 8.011077589  | 0.424664893  |
| 6 | -1.081450499 | 9.186789510  | -2.055789439 |
| 6 | -2.544795723 | 8.896546495  | 0.137250799  |
| 6 | -4.817754363 | 7.575257643  | 0.009614926  |
| 6 | -5.626870780 | 6.473405662  | -2.241791389 |
| 6 | -4.104756968 | 6.644187759  | -4.395404384 |
| 6 | -1.869570171 | 8.018782002  | -4.283761262 |
| 7 | 1.000080788  | 10.844530846 | 0.161858810  |
| 7 | 1.177437241  | 10.679589893 | -2.069752625 |
| 6 | -1.637167890 | 9.993160156  | 2.629659538  |
| 6 | 1.292587694  | 12.299907096 | 0.161858810  |
| 6 | 3.492825898  | 9.155212189  | -2.136112242 |
| 1 | 2.313457357  | 8.289479580  | 6.574967096  |
| 1 | 5.589922858  | 4.922541558  | 8.894630669  |
| 1 | 6.941861176  | 5.577393974  | -1.090105444 |
| 1 | -5.993524865 | 7.365862775  | 1.682627138  |
| 1 | -4.651001162 | 5.781747053  | -6.169705909 |
| 1 | -0.721773282 | 8.231918527  | -5.973569359 |
| 1 | -2.812847685 | 11.610707020 | 3.174405179  |
| 1 | -1.811249448 | 8.580304631  | 4.128790503  |
| 1 | -0.218560039 | 13.706621012 | 0.074750001  |
| 1 | 3.118361576  | 13.267427905 | 0.172605682  |
| 1 | 5.054130738  | 10.367371255 | -2.761123995 |
| 1 | 3.277225170  | 7.663360448  | -3.550640175 |
| 1 | 5.307569449  | -3.202996734 | 5.357514907  |
| 6 | 5.710712253  | -2.875507220 | 3.349601676  |
| 6 | 8.539841818  | -2.534547739 | 2.955323576  |
| 8 | 4.772210077  | -4.891952564 | 1.848849326  |
| 1 | 4.671746574  | -1.182429897 | 2.766188461  |
| 7 | 9.129593173  | -2.006563967 | 0.291386299  |
| 1 | 9.239722625  | -1.070182063 | 4.249105577  |
| 1 | 9.498375090  | -4.288610299 | 3.484174733  |
| 6 | 5.134629286  | -7.324825486 | 2.902343218  |
| 6 | 11.677816859 | -2.827585658 | -0.453640062 |
| 6 | 8.667171555  | 0.642850766  | -0.419388778 |
| 6 | 4.959251376  | -9.264330636 | 0.784612341  |
| 1 | 3.670847535  | -7.733599673 | 4.316591472  |
| 1 | 6.967788216  | -7.446359433 | 3.862380712  |
| 6 | 11.823716934 | -3.607133533 | -3.226108082 |
| 1 | 12.229656532 | -4.432932452 | 0.723649780  |
| 1 | 13.111648343 | -1.355500452 | -0.123289503 |

|   |               |               |              |
|---|---------------|---------------|--------------|
| 1 | 6.625515376   | 1.004459283   | -0.417795739 |
| 1 | 9.303385603   | 0.889781261   | -2.372469720 |
| 6 | 9.934314088   | 2.622197010   | 1.279327487  |
| 8 | 6.538293184   | -8.694298571  | -1.308918706 |
| 1 | 5.416300503   | -11.143243613 | 1.539572991  |
| 1 | 3.038080346   | -9.320412035  | 0.029014853  |
| 8 | 10.077971058  | -5.516293464  | -3.919524137 |
| 1 | 11.400429651  | -2.003882446  | -4.463392945 |
| 1 | 13.762092028  | -4.221483452  | -3.645659377 |
| 1 | 11.657113022  | 1.858893219   | 2.129167499  |
| 1 | 10.469280398  | 4.310070027   | 0.209648091  |
| 6 | 9.156897824   | -8.728676467  | -0.737134865 |
| 6 | 10.629927894  | -8.002347055  | -3.086797482 |
| 1 | 9.717838418   | -10.632033049 | -0.121870319 |
| 1 | 9.574706792   | -7.404636173  | 0.796177464  |
| 1 | 12.659151565  | -8.217828730  | -2.714268239 |
| 1 | 10.112789259  | -9.279333171  | -4.630318111 |
| 1 | -14.045545257 | -1.739502221  | -1.654895409 |
| 6 | -12.019681519 | -2.089449239  | -1.937562512 |
| 6 | -10.510973422 | -0.212724265  | -0.363330057 |
| 8 | -11.429261200 | -4.631977290  | -1.313644911 |
| 1 | -11.630626622 | -1.879534696  | -3.958630126 |
| 7 | -7.793817682  | -0.143498233  | -0.993357143 |
| 1 | -11.356654148 | 1.678549109   | -0.517645081 |
| 1 | -10.649849385 | -0.755421743  | 1.619326987  |
| 6 | -12.733644564 | -5.518264448  | 0.848881922  |
| 6 | -6.361501758  | 0.985890835   | 1.118022366  |
| 6 | -7.255132391  | 0.972880072   | -3.487332465 |
| 6 | -11.561336039 | -8.002783581  | 1.657729998  |
| 1 | -14.743215085 | -5.803546932  | 0.407020522  |
| 1 | -12.607696216 | -4.140684438  | 2.397289382  |
| 6 | -5.378829126  | -1.044374075  | 2.922098414  |
| 1 | -7.538353184  | 2.353538445   | 2.140010747  |
| 1 | -4.734037612  | 2.029900193   | 0.384192632  |
| 1 | -7.821046743  | -0.367980673  | -4.963490031 |
| 1 | -5.201852508  | 1.189754475   | -3.643223520 |
| 6 | -8.535945203  | 3.494785544   | -4.041129894 |
| 8 | -9.021253293  | -7.684854191  | 2.485352502  |
| 1 | -12.699833586 | -8.879599433  | 3.149765042  |
| 1 | -11.483394291 | -9.295165295  | 0.046988037  |
| 8 | -7.320004795  | -2.820072108  | 3.373839301  |
| 1 | -3.731205383  | -2.009910672  | 2.088502486  |
| 1 | -4.744062608  | -0.167291773  | 4.694394940  |
| 1 | -8.036789201  | 4.138358186   | -5.941317405 |
| 1 | -10.590432621 | 3.317353502   | -3.998166973 |
| 6 | -8.762848382  | -6.704817727  | 4.979809705  |
| 6 | -6.628601299  | -4.805189575  | 5.015650248  |
| 1 | -8.370210564  | -8.255976628  | 6.294437273  |
| 1 | -10.510807127 | -5.765703280  | 5.573028707  |
| 1 | -6.327018039  | -4.108901137  | 6.948429863  |
| 1 | -4.862217725  | -5.699984279  | 4.377654187  |
| 8 | 8.365665773   | 3.303403544   | 3.353282862  |
| 8 | -7.948280105  | 5.329040516   | -2.172423327 |
| 6 | 2.626520703   | -3.049271304  | -3.708294345 |
| 1 | 2.250605071   | -2.854752359  | -5.727207671 |
| 1 | 2.513065334   | -1.179497042  | -2.842728033 |
| 6 | 0.783159141   | -4.893016480  | -2.499398836 |
| 1 | 1.055164411   | -6.766910344  | -3.349276643 |
| 1 | 1.221889265   | -5.045386976  | -0.484873453 |
| 6 | -1.973015662  | -4.097816004  | -2.836890669 |
| 1 | -2.250788374  | -2.177648420  | -2.098504806 |
| 1 | -2.493387617  | -4.071133073  | -4.841816244 |
| 7 | 5.287493000   | -3.968449142  | -3.440731822 |
| 1 | 6.384756726   | -3.519093089  | -4.965438338 |
| 1 | 6.269343601   | -3.332371154  | -1.847054086 |
| 1 | 5.415905550   | -5.910401488  | -3.232210008 |
| 6 | -3.644833567  | -5.938902336  | -1.393400796 |
| 1 | -3.136589873  | -5.944741589  | 0.607788790  |
| 1 | -3.419103908  | -7.864351704  | -2.101692773 |
| 7 | -6.370124578  | -5.285729886  | -1.547114887 |
| 1 | -7.143750052  | -5.799553941  | -3.243168529 |
| 1 | -7.403249114  | -6.191670194  | -0.144244674 |
| 1 | -6.783893311  | -3.322996224  | -1.284131170 |

C4TB...A3

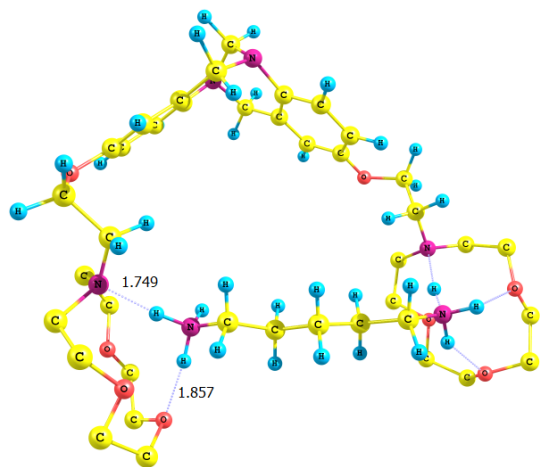

|   |              |               |              |
|---|--------------|---------------|--------------|
| 6 | 6.948775683  | 8.274000835   | 1.123357063  |
| 6 | 8.550244759  | 7.154908884   | 2.906744390  |
| 6 | 10.086255617 | 5.140661291   | 2.254123741  |
| 6 | 10.066948286 | 4.214591622   | -0.224639287 |
| 6 | 8.454573602  | 5.289968541   | -2.003738827 |
| 6 | 6.886150164  | 7.311051273   | -1.337493253 |
| 6 | 1.226050442  | 9.140426973   | -1.058824810 |
| 6 | 1.036423998  | 8.882422683   | 1.574903308  |
| 6 | -1.168474271 | 7.897021287   | 2.621210573  |
| 6 | -3.174533681 | 7.134220164   | 1.092284298  |
| 6 | -2.954376824 | 7.309388314   | -1.536311324 |
| 6 | -0.764838248 | 8.321049343   | -2.578470640 |
| 7 | 5.469048425  | 10.425361276  | 1.842862674  |
| 7 | 3.378202679  | 10.309239504  | -2.216058990 |
| 6 | 3.179038787  | 9.770089341   | 3.269658707  |
| 6 | 4.726384221  | 11.872545564  | -0.385160172 |
| 6 | 5.171590436  | 8.497840768   | -3.310864183 |
| 1 | 8.595862745  | 7.919917207   | 4.811756372  |
| 1 | 11.353460511 | 4.281567290   | 3.619269354  |
| 1 | 8.374700553  | 4.583159999   | -3.929242997 |
| 1 | -1.371651940 | 7.733491959   | 4.659433119  |
| 1 | -4.474393040 | 6.715632629   | -2.775924329 |
| 1 | -0.601675527 | 8.531644186   | -4.614642834 |
| 1 | 2.574668511  | 11.445195370  | 4.331522197  |
| 1 | 3.648017755  | 8.309076039   | 4.655472254  |
| 1 | 3.509368559  | 13.430448897  | 0.217269356  |
| 1 | 6.413486231  | 12.644629021  | -1.295550784 |
| 1 | 6.321571848  | 9.494571071   | -4.719673804 |
| 1 | 4.115093769  | 7.032692745   | -4.316988314 |
| 1 | 10.487002248 | -4.187829322  | 5.445751883  |
| 6 | 9.262650670  | -4.242975306  | 3.769043366  |
| 6 | 10.503459872 | -2.794761118  | 1.612688379  |
| 8 | 8.785511865  | -6.758884678  | 3.017886735  |
| 1 | 7.468688436  | -3.323808806  | 4.293750354  |
| 7 | 9.243452944  | -3.275197494  | -0.835736988 |
| 1 | 10.387923915 | -0.785704602  | 2.067796758  |
| 1 | 12.519574514 | -3.265180057  | 1.482684680  |
| 6 | 7.500307331  | -8.160721210  | 4.892865302  |
| 6 | 10.534725388 | -5.298876710  | -2.251079392 |
| 6 | 8.872715161  | -0.973562263  | -2.354477639 |
| 6 | 6.699596414  | -10.641647975 | 3.731959384  |
| 1 | 5.824785563  | -7.113028776  | 5.548452821  |
| 1 | 8.721325432  | -8.502149343  | 6.537367218  |
| 6 | 8.802409795  | -6.662497314  | -4.102179381 |
| 1 | 11.244891974 | -6.658818017  | -0.870186692 |
| 1 | 12.182768651 | -4.559725507  | -3.284878561 |
| 1 | 7.421611582  | 0.184201041   | -1.430802253 |
| 1 | 8.100283994  | -1.540625568  | -4.186398800 |
| 6 | 11.218333765 | 0.668688990   | -2.797291461 |
| 8 | 4.961424560  | -10.155840997 | 1.734827039  |
| 1 | 8.371675102  | -11.630738116 | 3.015989450  |
| 1 | 5.790972695  | -11.837583743 | 5.157782208  |

|   |               |               |              |
|---|---------------|---------------|--------------|
| 8 | 6.853236806   | -8.020471417  | -2.865720329 |
| 1 | 7.857624280   | -5.331117325  | -5.373169397 |
| 1 | 9.937233715   | -7.942722420  | -5.277883744 |
| 1 | 12.917603720  | -0.490684360  | -2.989348093 |
| 1 | 11.021129519  | 1.761022421   | -4.543566460 |
| 6 | 5.426656202   | -11.549634856 | -0.515090172 |
| 6 | 7.596161792   | -10.445224186 | -2.021001474 |
| 1 | 3.687299489   | -11.442581879 | -1.626746051 |
| 1 | 5.802469788   | -13.537424395 | -0.067453769 |
| 1 | 9.300724869   | -10.323276389 | -0.841712301 |
| 1 | 8.018812237   | -11.672812865 | -3.643178167 |
| 1 | -15.469268597 | 3.040612579   | -1.688277419 |
| 6 | -13.584011810 | 2.182716665   | -1.822349698 |
| 6 | -12.234431870 | 2.522967498   | 0.697307000  |
| 8 | -13.794258944 | -0.384956081  | -2.559509130 |
| 1 | -12.579459931 | 1.337028289   | -3.357364670 |
| 7 | -9.532034889  | 1.813917741   | 0.665472676  |
| 1 | -12.475800901 | 4.498768616   | 1.306983627  |
| 1 | -13.156372488 | 1.342376305   | 2.114956760  |
| 6 | -15.796565358 | -1.717658878  | -1.386690379 |
| 6 | -8.661320963  | 1.218444295   | 3.252411178  |
| 6 | -7.944857811  | 3.742364215   | -0.559990061 |
| 6 | -15.468508927 | -4.509060064  | -1.951459557 |
| 1 | -17.618563568 | -1.060533122  | -2.136306884 |
| 1 | -15.788503787 | -1.400494827  | 0.664142309  |
| 6 | -8.807410010  | -1.601261206  | 3.813822313  |
| 1 | -9.767058221  | 2.286364356   | 4.646802191  |
| 1 | -6.692935130  | 1.815021341   | 3.467826713  |
| 1 | -8.764541576  | 4.152073817   | -2.414667302 |
| 1 | -6.076943040  | 2.910298965   | -0.901214103 |
| 6 | -7.584689265  | 6.213528655   | 0.932817881  |
| 8 | -13.324261414 | -5.557313746  | -0.719823085 |
| 1 | -17.182770078 | -5.543545203  | -1.415894204 |
| 1 | -15.160481701 | -4.770613258  | -3.979003262 |
| 8 | -11.142183477 | -2.564390292  | 2.957731087  |
| 1 | -7.260956527  | -2.603059755  | 2.850927554  |
| 1 | -8.573046193  | -1.920091995  | 5.853645458  |
| 1 | -7.675176905  | 7.861923406   | -0.314420169 |
| 1 | -9.065142179  | 6.426840924   | 2.358740861  |
| 6 | -13.679764226 | -6.065842789  | 1.894866043  |
| 6 | -11.359619128 | -5.200044040  | 3.313077052  |
| 1 | -13.980510337 | -8.096230532  | 2.176044042  |
| 1 | -15.335770794 | -5.053444767  | 2.616901998  |
| 1 | -11.527619548 | -5.672039011  | 5.328638004  |
| 1 | -9.673123721  | -6.168834745  | 2.570238994  |
| 8 | 11.731020205  | 2.295569211   | -0.717035739 |
| 8 | -5.276980455  | 6.258647752   | 2.315575740  |
| 6 | 2.497943747   | -4.367682103  | -1.624767508 |
| 1 | 2.862711885   | -5.768008745  | -3.094671971 |
| 1 | 2.931949556   | -2.491153961  | -2.373036638 |
| 6 | -0.201947457  | -4.473525746  | -0.651868539 |
| 1 | -0.576678231  | -6.337292479  | 0.174300766  |
| 1 | -0.424594973  | -3.076069508  | 0.865974493  |
| 6 | -2.116513894  | -3.918949660  | -2.739671826 |
| 1 | -1.555433461  | -2.205554003  | -3.765169428 |
| 1 | -2.126875262  | -5.469808094  | -4.114026074 |
| 7 | 4.333476173   | -4.886251261  | 0.445106059  |
| 1 | 4.407345562   | -6.788782032  | 0.915840583  |
| 1 | 6.221779198   | -4.388773335  | -0.089406716 |
| 1 | 3.863117706   | -3.874482518  | 2.025602956  |
| 6 | -4.761483992  | -3.541006352  | -1.647722009 |
| 1 | -4.718855553  | -1.915938378  | -0.358271260 |
| 1 | -5.301265323  | -5.204904416  | -0.533463977 |
| 6 | -6.703109415  | -3.061652788  | -3.705883055 |
| 1 | -6.904847113  | -4.694309902  | -4.951643339 |
| 1 | -6.160578532  | -1.432880951  | -4.853319006 |
| 7 | -9.232630483  | -2.483895524  | -2.624483578 |
| 1 | -9.239603572  | -0.965377860  | -1.297363032 |
| 1 | -10.498824374 | -1.922883121  | -3.979787498 |
| 1 | -10.128593038 | -3.982582403  | -1.745583359 |





C4TB-A5

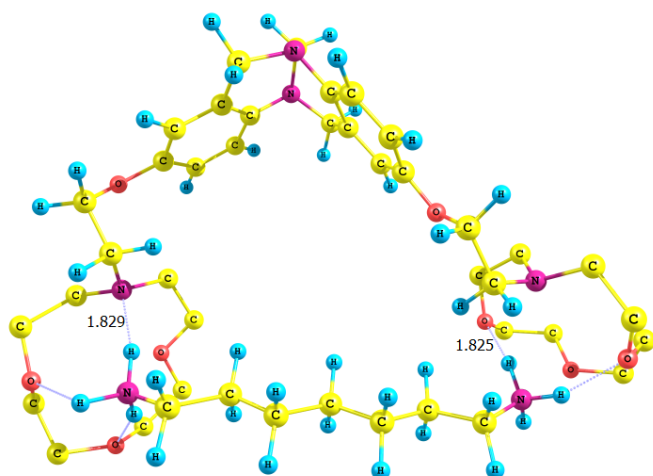

|   |              |               |              |
|---|--------------|---------------|--------------|
| 6 | 4.271529066  | 8.908655859   | 2.129509540  |
| 6 | 5.641440568  | 7.573097686   | 3.954089115  |
| 6 | 7.710977764  | 6.121007670   | 3.282062869  |
| 6 | 8.465945973  | 5.987657266   | 0.749497452  |
| 6 | 7.108359264  | 7.300697464   | -1.081732068 |
| 6 | 5.007660486  | 8.756338276   | -0.405508741 |
| 6 | -0.749981222 | 9.210962885   | -1.335212353 |
| 6 | -1.386066769 | 8.051238046   | 0.966375635  |
| 6 | -3.208231275 | 6.157660795   | 0.994211299  |
| 6 | -4.390398500 | 5.378080795   | -1.229907373 |
| 6 | -3.786275778 | 6.548134876   | -3.518199249 |
| 6 | -1.971758994 | 8.450327387   | -3.539965113 |
| 7 | 2.160759938  | 10.414170319  | 2.915414453  |
| 7 | 1.124882071  | 11.164640980  | -1.477497382 |
| 6 | -0.108734833 | 8.888751376   | 3.396402630  |
| 6 | 1.539423703  | 12.304461336  | 1.001998860  |
| 6 | 3.563085910  | 10.217455513  | -2.411101389 |
| 1 | 5.067536454  | 7.714424624   | 3.964015457  |
| 1 | 8.796147243  | 5.101362549   | 4.692340808  |
| 1 | 7.651848237  | 7.233610302   | -3.059258506 |
| 1 | -3.714473749 | 5.223605144   | 2.753816425  |
| 1 | -4.714448712 | 6.022883648   | -5.265507928 |
| 1 | -1.496141419 | 9.390286543   | -5.302646713 |
| 1 | -1.423158311 | 10.026808617  | 4.525487452  |
| 1 | 0.411956486  | 7.246764685   | 4.538403729  |
| 1 | -0.171309330 | 13.299524901  | 1.597306010  |
| 1 | 3.090045921  | 13.661823167  | 0.846642596  |
| 1 | 4.688848594  | 11.840040387  | -3.042373804 |
| 1 | 3.229847850  | 9.026128786   | -4.067272363 |
| 1 | 6.875097157  | -2.407665867  | 5.224376152  |
| 6 | 7.484994881  | -2.768877541  | 3.270902147  |
| 6 | 8.597899869  | -0.365299151  | 2.135838232  |
| 8 | 9.299848036  | -4.726310522  | 3.186463521  |
| 1 | 5.805757912  | -3.351342113  | 2.192875832  |
| 7 | 9.930426922  | -0.893288593  | -0.255037419 |
| 1 | 7.040433063  | 0.951883326   | 1.797649090  |
| 1 | 9.875575735  | 0.551688495   | 3.488324571  |
| 6 | 8.363632428  | -7.054700494  | 4.088989094  |
| 6 | 12.635870141 | -1.312414699  | 0.270695689  |
| 6 | 9.447736103  | 0.960765038   | -2.273279893 |
| 6 | 10.278157291 | -9.063917636  | 3.419651928  |
| 1 | 6.535898901  | -7.492423394  | 3.192382143  |
| 1 | 8.065770038  | -6.998358314  | 6.143489740  |
| 6 | 14.038496579 | -2.725665177  | -1.803998569 |
| 1 | 12.738157229 | -2.419557913  | 2.006303185  |
| 1 | 13.600070701 | 0.487668358   | 0.660258922  |
| 1 | 7.414904944  | 1.352287917   | -2.276739981 |
| 1 | 9.884328946  | 0.098063551   | -4.108572325 |
| 6 | 10.919188251 | 3.437131894   | -2.107841942 |
| 8 | 10.468018061 | -9.212255457  | 0.741086282  |
| 1 | 12.107406379 | -8.567080328  | 4.254124689  |
| 1 | 9.689810002  | -10.900493192 | 4.175221070  |
| 8 | 13.256943705 | -5.285841380  | -2.000824869 |
| 1 | 13.713592211 | -1.877635522  | -3.663137453 |
| 1 | 16.077365412 | -2.634587943  | -1.426338720 |

|   |               |               |              |
|---|---------------|---------------|--------------|
| 1 | 12.949026083  | 3.116279098   | -2.298143018 |
| 1 | 10.363569126  | 4.678056369   | -3.664530181 |
| 6 | 12.976457346  | -9.408023511  | -0.202843188 |
| 6 | 14.360503998  | -6.898616686  | -0.171925381 |
| 1 | 12.810718928  | -10.086363331 | -2.148361446 |
| 1 | 14.042827831  | -10.811464421 | 0.887411545  |
| 1 | 14.237371342  | -6.052856592  | 1.718794604  |
| 1 | 16.366708917  | -7.203153588  | -0.615100140 |
| 1 | -16.314439096 | -0.559835104  | -4.632425156 |
| 6 | -14.550952473 | -1.212117492  | -3.751038057 |
| 6 | -13.207421546 | 1.031206464   | -2.515659928 |
| 8 | -15.059046879 | -3.226707125  | -2.051951406 |
| 1 | -13.373318701 | -2.043183077  | -5.233928717 |
| 7 | -11.011404990 | 0.230100595   | -1.037724129 |
| 1 | -12.715448392 | 2.383964924   | -4.018256650 |
| 1 | -14.515627825 | 2.037682085   | -1.273611066 |
| 6 | -16.740519394 | -2.627968233  | -0.054344740 |
| 6 | -10.776823854 | 1.560159666   | 1.373662608  |
| 6 | -8.705000090  | 0.123075964   | -2.546384983 |
| 6 | -16.570173825 | -4.708923153  | 1.908205619  |
| 1 | -18.680723744 | -2.473895094  | -0.776203060 |
| 1 | -16.234014248 | -0.815069054  | 0.811191337  |
| 6 | -8.902640862  | 0.290016247   | 3.153363080  |
| 1 | -12.648570989 | 1.571252357   | 2.251360961  |
| 1 | -10.197305365 | 3.548083376   | 1.158727064  |
| 1 | -9.180050747  | -0.791798969  | -4.342110331 |
| 1 | -7.308158103  | -1.088608781  | -1.604443505 |
| 6 | -7.368298632  | 2.597401915   | -3.181854479 |
| 8 | -14.124329824 | -4.838295684  | 2.996277718  |
| 1 | -18.013323547 | -4.420261839  | 3.369712140  |
| 1 | -16.904266041 | -6.540736599  | 1.009408475  |
| 8 | -9.347765818  | -2.345104598  | 3.469546364  |
| 1 | -6.983563649  | 0.464865034   | 2.408387742  |
| 1 | -8.956993161  | 1.243141124   | 4.993990208  |
| 1 | -6.003330653  | 2.222423587   | -4.696299784 |
| 1 | -8.692747106  | 4.054741590   | -3.841892303 |
| 6 | -13.689267658 | -3.093587268  | 4.975436879  |
| 6 | -10.878209543 | -3.093993559  | 5.545631460  |
| 1 | -14.725952438 | -3.669825193  | 6.681700709  |
| 1 | -14.338541603 | -1.194013917  | 4.458931302  |
| 1 | -10.495729003 | -1.884051141  | 7.184173181  |
| 1 | -10.295676941 | -5.024042521  | 6.008686137  |
| 8 | 10.612897683  | 4.614504884   | 0.285777592  |
| 8 | -6.081810974  | 3.447323186   | -0.986196971 |
| 6 | 5.750591141   | -5.724076395  | -3.848992004 |
| 1 | 5.737939425   | -7.530913333  | -4.848118480 |
| 1 | 5.669278121   | -4.206802171  | -5.246646573 |
| 6 | 3.553665626   | -5.560943910  | -2.006883331 |
| 1 | 3.820493046   | -6.947759011  | -0.485470606 |
| 1 | 3.513231159   | -3.680366085  | -1.135371940 |
| 6 | 1.026582305   | -6.057743424  | -3.314044592 |
| 1 | 0.728137880   | -4.637400804  | -4.796596991 |
| 1 | 1.087132905   | -7.903644777  | -4.258966167 |
| 7 | 8.234979883   | -5.524415506  | -2.545440120 |
| 1 | 9.717675901   | -5.717934786  | -3.777352492 |
| 1 | 8.604876738   | -3.783787009  | -1.608616020 |
| 1 | 8.550887266   | -6.926316290  | -1.213064245 |
| 6 | -1.183522159  | -5.996983064  | -1.458694608 |
| 1 | -1.181424563  | -4.184314432  | -0.446668863 |
| 1 | -0.920394822  | -7.473991007  | -0.025252408 |
| 6 | -3.735646239  | -6.347750222  | -2.757191476 |
| 1 | -3.759553162  | -8.146714561  | -3.789862478 |
| 1 | -3.986556497  | -4.848566345  | -4.171925388 |
| 6 | -5.940102312  | -6.263957882  | -0.894403531 |
| 1 | -5.826117819  | -4.523762132  | 0.232661174  |
| 1 | -5.814516792  | -7.840544936  | 0.444435207  |
| 6 | -8.470265886  | -6.336920203  | -2.262026575 |
| 1 | -8.862521979  | -8.194707932  | -3.067488262 |
| 1 | -8.513506596  | -4.957922898  | -3.794709625 |
| 7 | -10.572884625 | -5.689711728  | -0.506599633 |
| 1 | -10.155026525 | -4.145491901  | 0.641340875  |
| 1 | -12.246813355 | -5.172994503  | -1.387357452 |
| 1 | -10.993291966 | -7.136943259  | 0.705927930  |

C4TB-A6

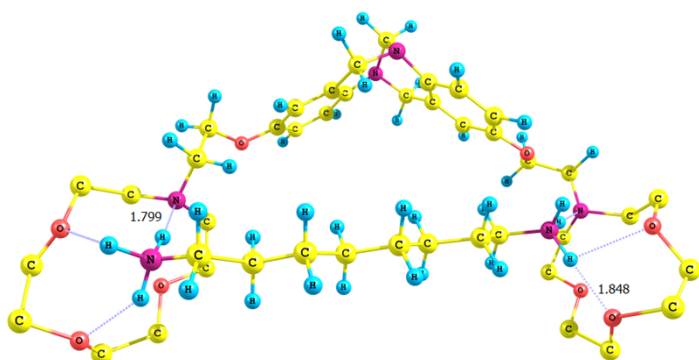

|   |              |              |              |
|---|--------------|--------------|--------------|
| 6 | 1.470340990  | 8.630578901  | 1.048297146  |
| 6 | 2.723006332  | 8.632699173  | 3.379128644  |
| 6 | 5.025117775  | 7.427071000  | 3.664205148  |
| 6 | 6.142439053  | 6.217111575  | 1.592065799  |
| 6 | 4.851149600  | 6.088281395  | -0.694842797 |
| 6 | 2.498854595  | 7.270116029  | -0.970398862 |
| 6 | -3.376161774 | 6.793213440  | -2.384962699 |
| 6 | -4.306725212 | 7.161373636  | 0.060386194  |
| 6 | -6.459950813 | 5.852813978  | 0.868276179  |
| 6 | -7.669702368 | 4.170190620  | -0.747671977 |
| 6 | -6.653946304 | 3.689688103  | -3.146835967 |
| 6 | -4.535744884 | 4.998143826  | -3.948076007 |
| 7 | -0.748845497 | 10.149107903 | 0.740258582  |
| 7 | -1.390528413 | 8.338187268  | -3.385417652 |
| 6 | -3.057907352 | 9.059125291  | 1.816888390  |
| 6 | -1.182068959 | 10.670063784 | -1.930870993 |
| 6 | 1.105544505  | 7.130658030  | -3.479822694 |
| 1 | 1.901215523  | 9.681680400  | 4.941843220  |
| 1 | 6.046998442  | 7.485197082  | 5.440821588  |
| 1 | 5.648455231  | 5.083829672  | -2.300023295 |
| 1 | -7.170395188 | 6.199945304  | 2.761588868  |
| 1 | -7.621977339 | 2.384170904  | -4.400172162 |
| 1 | -3.802686158 | 4.719356330  | -5.845597115 |
| 1 | -4.385630721 | 10.599382363 | 2.222994284  |
| 1 | -2.597258296 | 8.163523674  | 3.623328485  |
| 1 | -2.930367855 | 11.756032618 | -2.117281123 |
| 1 | 0.392480970  | 11.778822714 | -2.680625448 |
| 1 | 2.226981606  | 8.063583625  | -4.953279841 |
| 1 | 0.870031735  | 5.157271982  | -4.054565845 |
| 1 | 10.103884871 | -2.815837232 | 5.846286865  |
| 6 | 10.518904602 | -2.682241163 | 3.814411908  |
| 6 | 10.513409279 | 0.086222528  | 3.008927544  |
| 8 | 12.868720288 | -3.812456042 | 3.247333485  |
| 1 | 9.016345674  | -3.709203303 | 2.811492752  |
| 7 | 11.714944306 | 0.457746436  | 0.516660534  |
| 1 | 8.545834139  | 0.708044423  | 2.920824739  |
| 1 | 11.439932483 | 1.275149303  | 4.435430670  |
| 6 | 12.884136672 | -6.430253769 | 3.764851954  |
| 6 | 14.428872395 | 1.031170560  | 0.835200305  |
| 6 | 10.374074113 | 2.298647575  | -1.081622464 |
| 6 | 15.280450955 | -7.516859441 | 2.660562227  |
| 1 | 11.226786509 | -7.344289664 | 2.895532646  |
| 1 | 12.806242167 | -6.789173206 | 5.809272802  |
| 6 | 16.039510421 | 0.481129906  | -1.486416889 |
| 1 | 15.105165642 | -0.126305506 | 2.402336840  |
| 1 | 14.719771144 | 3.013640520  | 1.389147023  |
| 1 | 8.464694974  | 1.564804612  | -1.420722454 |
| 1 | 11.322918760 | 2.363238409  | -2.921127095 |
| 6 | 10.175205019 | 5.003149710  | -0.091162271 |
| 8 | 15.241208905 | -7.159946893 | -0.001982323 |
| 1 | 16.913623964 | -6.561332723 | 3.502690268  |
| 1 | 15.415046689 | -9.539181833 | 3.091121176  |
| 8 | 16.184947513 | -2.133959845 | -2.055832903 |
| 1 | 15.279286884 | 1.395214933  | -3.17872336  |
| 1 | 17.943010623 | 1.247631113  | -1.174086757 |
| 1 | 12.008477333 | 5.679783108  | 0.580542721  |
| 1 | 9.577926885  | 6.257810604  | -1.624758059 |

|   |               |               |              |
|---|---------------|---------------|--------------|
| 6 | 17.559205385  | -6.287409382  | -1.036575176 |
| 6 | 17.969275924  | -3.485476754  | -0.591168650 |
| 1 | 17.466671172  | -6.655854927  | -3.068858314 |
| 1 | 19.148113452  | -7.363606443  | -0.252448495 |
| 1 | 17.747722559  | -3.044520533  | 1.424687100  |
| 1 | 19.896609350  | -2.960178282  | -1.160618680 |
| 1 | -17.664580285 | -1.623049747  | -2.982074537 |
| 6 | -15.806510986 | -1.325433021  | -2.105390967 |
| 6 | -16.106726085 | -1.213867378  | 0.755030570  |
| 8 | -14.102352310 | -3.239237899  | -2.889001753 |
| 1 | -15.038722876 | 0.449541246   | -2.841263495 |
| 7 | -13.837059348 | -0.232207640  | 2.054328681  |
| 1 | -17.762553129 | -0.046536392  | 1.233611236  |
| 1 | -16.468480110 | -3.113612694  | 1.470635787  |
| 6 | -15.173919542 | -5.687149260  | -2.945077482 |
| 6 | -13.762829021 | -1.145757874  | 4.688746549  |
| 6 | -13.787750728 | 2.543556063   | 1.943626643  |
| 6 | -13.062855618 | -7.561802794  | -3.423777200 |
| 1 | -16.584688810 | -5.820854932  | -4.464755438 |
| 1 | -16.121116348 | -6.123228098  | -1.149433391 |
| 6 | -12.184093349 | -3.533564611  | 4.951522396  |
| 1 | -15.692182564 | -1.458494297  | 5.389124354  |
| 1 | -12.908208002 | 0.296554699   | 5.899635719  |
| 1 | -14.949231122 | 3.368083196   | 3.458425326  |
| 1 | -14.605427604 | 3.157414653   | 0.148148848  |
| 6 | -11.137479949 | 3.616139967   | 2.086482369  |
| 8 | -11.297464151 | -7.622937319  | -1.395007063 |
| 1 | -13.844512427 | -9.451445635  | -3.755614974 |
| 1 | -11.993062839 | -6.989030626  | -5.096169582 |
| 8 | -12.878611114 | -5.264587632  | 3.041495081  |
| 1 | -10.165140338 | -3.058948591  | 4.766066577  |
| 1 | -12.457011356 | -4.360983025  | 6.836886897  |
| 1 | -11.248909531 | 5.680132707   | 2.220448824  |
| 1 | -10.098964024 | 2.908586873   | 3.741283292  |
| 6 | -12.108678164 | -9.013652815  | 0.761493433  |
| 6 | -11.468276483 | -7.529433678  | 3.115260535  |
| 1 | -11.158775271 | -10.853654443 | 0.791723380  |
| 1 | -14.154074111 | -9.329773737  | 0.695628923  |
| 1 | -11.927349507 | -8.639080778  | 4.809103197  |
| 1 | -9.428691444  | -7.113280110  | 3.157250247  |
| 8 | 8.496865669   | 5.229425500   | 1.999600327  |
| 8 | -9.854242619  | 2.911062414   | -0.169952507 |
| 6 | 9.042429562   | -4.292225345  | -3.782738211 |
| 1 | 9.038602867   | -6.075255514  | -4.820862962 |
| 1 | 8.898971014   | -2.745992959  | -5.144504994 |
| 6 | 6.901211280   | -4.152109722  | -1.876471450 |
| 1 | 7.024827706   | -5.743217430  | -0.551792430 |
| 1 | 7.115082909   | -2.414461322  | -0.759573471 |
| 6 | 4.303367169   | -4.129132543  | -3.129743395 |
| 1 | 4.252450392   | -2.656928284  | -4.591658097 |
| 1 | 3.969063303   | -5.937609763  | -4.088261550 |
| 7 | 11.536529606  | -4.016204408  | -2.512487078 |
| 1 | 12.135922344  | -5.564555176  | -1.488960460 |
| 1 | 12.980310497  | -3.679175557  | -3.759041047 |
| 1 | 11.592267074  | -2.441709281  | -1.253332416 |
| 6 | 2.216438825   | -3.630709755  | -1.201293142 |
| 1 | 2.559342834   | -1.790462462  | -0.300870834 |
| 1 | 2.319710461   | -5.050627186  | 0.309701523  |
| 6 | -0.428007819  | -3.646713844  | -2.347495102 |
| 1 | -0.824969329  | -5.518965537  | -3.150770376 |
| 1 | -0.511947557  | -2.296404470  | -3.922683758 |
| 6 | -2.454124780  | -2.973954385  | -0.408766629 |
| 1 | -2.104786255  | -1.056740442  | 0.308461863  |
| 1 | -2.308207698  | -4.252968177  | 1.219032000  |
| 6 | -5.121059163  | -3.107321796  | -1.494678771 |
| 1 | -5.536487076  | -5.036541168  | -2.134042992 |
| 1 | -5.254730821  | -1.866954790  | -3.153295050 |
| 6 | -7.077785387  | -2.303766842  | 0.446797364  |
| 1 | -7.003925447  | -3.525748704  | 2.110015127  |
| 1 | -6.776377871  | -0.355381869  | 1.059365271  |
| 7 | -9.670066145  | -2.477581949  | -0.612159726 |
| 1 | -10.251648215 | -4.331431490  | -0.875825635 |
| 1 | -11.095042372 | -1.598995425  | 0.492706367  |
| 1 | -9.783874892  | -1.612949161  | -2.338779686 |

C5TB--A1

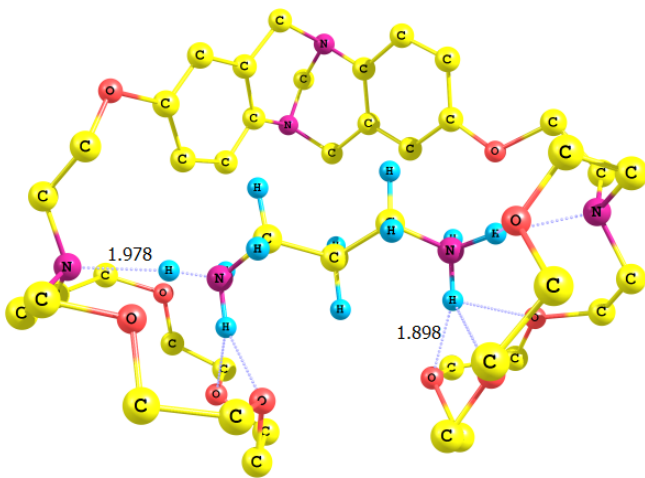

|   |              |              |              |
|---|--------------|--------------|--------------|
| 6 | -5.474923583 | -7.003105305 | 2.844931453  |
| 6 | -7.620550596 | -4.194741940 | -5.348773035 |
| 6 | -4.889015930 | -7.488477646 | 0.094675272  |
| 1 | -7.531427338 | -6.960233092 | 3.086289146  |
| 1 | -4.686087704 | -8.501720375 | 4.043992829  |
| 6 | -5.944590411 | -6.061373587 | -3.984324730 |
| 1 | -7.489418730 | -4.490969717 | -7.399945873 |
| 1 | -9.591788025 | -4.492324650 | -4.773024549 |
| 8 | -6.252430554 | -5.701157799 | -1.355332266 |
| 1 | -2.846611420 | -7.269541552 | -0.232914397 |
| 1 | -5.446745879 | -9.423468241 | -0.414740052 |
| 1 | -6.476157103 | -7.996165761 | -4.521827052 |
| 1 | -3.958639575 | -5.761583677 | -4.527267573 |
| 1 | 8.064598408  | -6.933655986 | -6.155710598 |
| 6 | 7.662251179  | -5.224013325 | -5.052821158 |
| 6 | 9.646928340  | -4.980537249 | -2.990572635 |
| 8 | 5.180545848  | -5.343175666 | -4.034682149 |
| 1 | 7.705312365  | -3.636133268 | -6.371490850 |
| 7 | 9.550837663  | -2.586700397 | -1.564419108 |
| 1 | 11.535206798 | -5.249530295 | -3.829773491 |
| 1 | 9.346507261  | -6.521478402 | -1.643506031 |
| 6 | 4.397910160  | -7.857165076 | -3.529462016 |
| 6 | 11.156140993 | -2.856005247 | 0.706963500  |
| 6 | 10.413673321 | -0.447103500 | -3.138020395 |
| 6 | 1.737293131  | -7.800471407 | -2.484598502 |
| 1 | 5.682976745  | -8.773840918 | -2.177501021 |
| 1 | 4.415877675  | -8.966991701 | -5.284170862 |
| 6 | 10.535071208 | -1.003898034 | 2.817585228  |
| 1 | 13.171696276 | -2.691304289 | 0.211303491  |
| 1 | 10.872629182 | -4.764853373 | 1.450396822  |
| 1 | 11.145396011 | 1.038731353  | -1.902245423 |
| 1 | 12.002974451 | -1.043261027 | -4.338166473 |
| 6 | 8.291752921  | 0.717287073  | -4.770390271 |
| 8 | 1.637147103  | -6.739365698 | -0.017859800 |
| 1 | 0.554328442  | -6.607355109 | -3.692343168 |
| 1 | 0.936831659  | -9.713216148 | -2.471935448 |
| 8 | 8.035186713  | -1.389417254 | 3.739495611  |
| 1 | 11.908499490 | -1.248139449 | 4.350536620  |
| 1 | 10.667743201 | 0.964185443  | 2.201220862  |
| 1 | 6.451430039  | -0.068833269 | -4.214825948 |
| 1 | 8.583774168  | 0.297849162  | -6.768883218 |
| 6 | 1.987740406  | -8.519438446 | 1.964005448  |
| 6 | 7.934713762  | -3.095291801 | 5.813692871  |
| 6 | 2.417745665  | -7.043562449 | 4.367026369  |
| 1 | 3.632278227  | -9.722940678 | 1.579878957  |
| 1 | 0.306715756  | -9.724146323 | 2.140277199  |
| 6 | 5.279567489  | -4.097311447 | 6.129613482  |
| 1 | 8.525666983  | -2.123876267 | 7.548266687  |
| 1 | 9.209328272  | -4.699540664 | 5.492433784  |
| 8 | 4.726418236  | -5.719639319 | 4.075194094  |
| 1 | 0.839157392  | -5.720451901 | 4.668949779  |
| 1 | 2.515712840  | -8.331779207 | 5.991166487  |
| 1 | 5.167676814  | -5.142809909 | 7.919663984  |
| 1 | 3.906921554  | -2.533842871 | 6.217610463  |
| 8 | -6.848195018 | 4.530088934  | 0.347938239  |
| 8 | 8.182836674  | 3.397341823  | -4.672990014 |
| 6 | -0.318258202 | -0.902089047 | 0.264072199  |
| 1 | -0.071970214 | 0.422665563  | 1.842121901  |
| 1 | -0.665249688 | -2.785735787 | 1.056744221  |
| 6 | 2.081376329  | -0.978129731 | -1.326419458 |
| 1 | 2.632129410  | 0.909213314  | -1.961116057 |
| 1 | 1.875447219  | -2.204743311 | -2.973710610 |
| 7 | 4.189171028  | -2.041136504 | 0.189171020  |
| 1 | 5.920167592  | -2.214749410 | -0.759957086 |
| 1 | 4.591342513  | -1.004963840 | 1.776829979  |
| 1 | 3.746636885  | -3.854997553 | 0.766769548  |
| 6 | -2.587484633 | -0.134625969 | -1.334227806 |
| 1 | -2.771865198 | -1.337453568 | -2.998205238 |
| 1 | -2.478787594 | 1.835477625  | -1.951629633 |
| 7 | -4.953026618 | -0.450399182 | 0.133231351  |
| 1 | -6.597547432 | -0.199800729 | -0.925158821 |
| 1 | -5.085961283 | -2.239795838 | 0.910398172  |
| 1 | -5.112065957 | 0.828680751  | 1.574508355  |

|   |               |              |              |
|---|---------------|--------------|--------------|
| 6 | -0.685316689  | 9.420478695  | 0.503776382  |
| 6 | -2.562258681  | 9.761600692  | -1.318338990 |
| 6 | -4.666644314  | 8.188810098  | -1.440231985 |
| 6 | -4.914697306  | 6.239395224  | 0.320665713  |
| 6 | -3.071585188  | 5.905087579  | 2.171894204  |
| 6 | -0.950692799  | 7.452017273  | 2.267015451  |
| 6 | 4.609580258   | 6.979332553  | 1.371869258  |
| 6 | 4.667071392   | 8.076651081  | -1.046511355 |
| 6 | 5.909766540   | 6.843170236  | -3.013736896 |
| 6 | 6.990929801   | 4.472456071  | -2.650027004 |
| 6 | 6.800485106   | 3.317812705  | -0.284220458 |
| 6 | 5.657559930   | 4.583082520  | 1.711434121  |
| 7 | 1.463721280   | 11.076825414 | 0.521760904  |
| 7 | 3.457966123   | 8.223686880  | 3.480450083  |
| 6 | 3.249538795   | 10.524845901 | -1.534294986 |
| 6 | 2.869768122   | 10.859089295 | 2.888562444  |
| 6 | 1.085194046   | 6.998876099  | 4.230140287  |
| 1 | -2.365267975  | 11.299748830 | -2.664041212 |
| 1 | -6.084231713  | 8.500072534  | -2.885923389 |
| 1 | -3.315543144  | 4.413753623  | 3.568241083  |
| 1 | 5.977199522   | 7.680492704  | -4.888254370 |
| 1 | 7.570709073   | 1.452483079  | 0.026456164  |
| 1 | 5.606639374   | 3.702766897  | 3.568673830  |
| 1 | 4.558512303   | 12.121983725 | -1.700165685 |
| 1 | 2.216263081   | 10.391905567 | -3.319069373 |
| 1 | 4.620627596   | 11.939908626 | 2.707688214  |
| 1 | 1.756349128   | 11.638905512 | 4.443972231  |
| 1 | 0.514515695   | 7.757665334  | 6.071474173  |
| 1 | 1.406111093   | 4.973152200  | 4.479807105  |
| 1 | -12.224008141 | -3.471800807 | 3.308913985  |
| 6 | -11.252371509 | -1.732357167 | 2.716819370  |
| 6 | -11.621461451 | -1.491562613 | -0.120294287 |
| 8 | -8.646656690  | -1.913729288 | 3.263004982  |
| 1 | -12.109570115 | -0.167673497 | 3.77770121   |
| 7 | -10.310841992 | 0.63364342   | -1.347079833 |
| 1 | -13.673770015 | -1.420042153 | -0.483114118 |
| 1 | -10.880879726 | -3.224354417 | -0.975442540 |
| 6 | -8.114054427  | -2.959513099 | 5.657943545  |
| 6 | -10.737309684 | 0.544845797  | -4.104717283 |
| 6 | -11.011739471 | 3.089378848  | -0.279184338 |
| 6 | -5.288281016  | -3.521024389 | 5.749925957  |
| 1 | -9.234612806  | -4.685496220 | 5.937976370  |
| 1 | -8.601019807  | -1.646693998 | 7.192021213  |
| 6 | -8.278020282  | 0.275601418  | -5.586920083 |
| 1 | -11.708286801 | 2.259163640  | -4.755038137 |
| 1 | -12.006243677 | -1.028232036 | -4.556467619 |
| 1 | -12.912775470 | 3.681019930  | -0.889624414 |
| 1 | -11.024217332 | 2.953152281  | 1.780273059  |
| 6 | -9.119231806  | 5.130968886  | -0.959332626 |
| 8 | -4.384400509  | -4.637907251 | 3.484441184  |
| 1 | -4.214574614  | -1.764828329 | 5.943490590  |
| 1 | -4.866579213  | -4.726197139 | 7.385100186  |
| 8 | -6.774146105  | -1.747329466 | -4.701730856 |
| 1 | -8.685441426  | 0.060371076  | -7.612555165 |
| 1 | -7.108109820  | 1.966248553  | -5.337600975 |
| 1 | -9.811321272  | 6.985045194  | -0.344489489 |
| 1 | -8.781736193  | 5.207844829  | -3.003906542 |

C5TB-A2

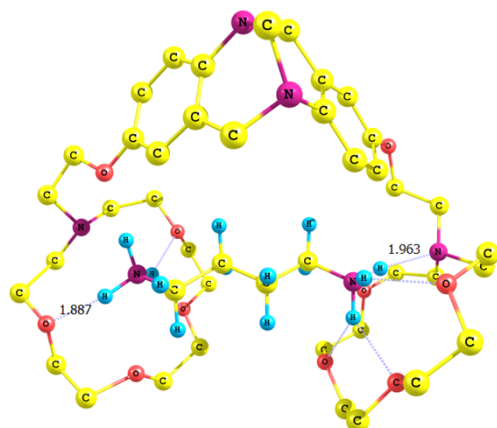

|   |              |              |              |
|---|--------------|--------------|--------------|
| 6 | 1.399595318  | 9.382782441  | -1.026610651 |
| 6 | 3.362950700  | 9.869696798  | 0.663702003  |
| 6 | 5.438807140  | 8.269663914  | 0.853610016  |
| 6 | 5.564540058  | 6.141135142  | -0.700899369 |
| 6 | 3.630220316  | 5.653353400  | -2.416351048 |
| 6 | 1.534262861  | 7.234075175  | -2.577782780 |
| 6 | -4.125443798 | 7.114066236  | -1.571513140 |
| 6 | -3.985955564 | 8.367551720  | 0.767015212  |
| 6 | -5.207905301 | 7.353885692  | 2.865486003  |
| 6 | -6.507445296 | 5.071041896  | 2.699946006  |
| 6 | -6.632879638 | 3.817201144  | 0.379986102  |
| 6 | -5.466676819 | 4.851589907  | -1.734696648 |
| 7 | -0.702123912 | 11.089567836 | -1.135105489 |
| 7 | -2.893807326 | 8.074938989  | -3.784361485 |
| 6 | -2.433694953 | 10.768749055 | 1.012231726  |
| 6 | -2.165642990 | 10.718684544 | -3.447334524 |
| 6 | -0.596301146 | 6.643913748  | -4.403479183 |
| 1 | 3.262672391  | 11.549803042 | 1.839298651  |
| 1 | 6.930902655  | 8.712902924  | 2.183330826  |
| 1 | 3.773690203  | 4.006071697  | -3.637832132 |
| 1 | -5.086547098 | 8.288402437  | 4.690717533  |
| 1 | -7.649493639 | 2.050838357  | 0.207087512  |
| 1 | -5.611781318 | 3.899496821  | -3.551362050 |
| 1 | -3.673803066 | 12.426696371 | 1.095232271  |
| 1 | -1.342104184 | 10.732186636 | 2.766224366  |
| 1 | -3.859243767 | 11.896684923 | -3.342571895 |
| 1 | -1.044190772 | 11.296392676 | -5.082988744 |
| 1 | -0.039419684 | 7.120376031  | -6.341805144 |
| 1 | -1.023430242 | 4.621971191  | -4.370168983 |
| 1 | 14.906765200 | -3.244183311 | -1.888140508 |
| 6 | 13.250520526 | -2.000794634 | -1.805979002 |
| 6 | 12.783342468 | -1.320863664 | 0.952875432  |
| 8 | 11.155982256 | -3.222398550 | -2.969008972 |
| 1 | 13.688213191 | -0.341794740 | -2.953622823 |
| 7 | 10.879441644 | 0.655693344  | 1.387208164  |
| 1 | 14.620632339 | -0.782059321 | 1.788890210  |
| 1 | 12.141100193 | -3.029408394 | 1.933303070  |
| 6 | 11.309917445 | -5.901172066 | -2.895969173 |
| 6 | 10.394732597 | 0.931060436  | 4.113292860  |
| 6 | 11.688556172 | 3.051278193  | 0.258125232  |
| 6 | 8.990618945  | -6.959590585 | -4.194089984 |
| 1 | 11.411762337 | -6.572899736 | -0.931837113 |
| 1 | 13.021672819 | -6.525934376 | -3.889184586 |
| 6 | 7.609435227  | 1.320281628  | 4.767009551  |
| 1 | 11.507108462 | 2.493699422  | 4.924822458  |
| 1 | 11.053415488 | -0.778119242 | 5.072587692  |
| 1 | 13.500576628 | 3.699975771  | 1.069768213  |
| 1 | 11.970622342 | 2.781553823  | -1.769422253 |
| 6 | 9.791348758  | 5.170398019  | 0.572001159  |
| 8 | 6.783126083  | -6.507418840 | -2.746864123 |
| 1 | 8.734156672  | -6.005046525 | -6.010386890 |
| 1 | 9.235315784  | -8.987482000 | -4.549802556 |
| 8 | 6.092153444  | -0.790128451 | 4.116116111  |
| 1 | 7.433618901  | 1.720799603  | 6.797737444  |
| 1 | 6.797013679  | 2.909979601  | 3.727463725  |
| 1 | 10.513781555 | 6.889765210  | -0.330250403 |
| 1 | 9.457473861  | 5.594545128  | 2.570548909  |

|   |               |               |              |
|---|---------------|---------------|--------------|
| 6 | 6.241451246   | -8.459660744  | -1.000473851 |
| 6 | 6.233854547   | -2.840275168  | 5.824774224  |
| 6 | 4.466686738   | -7.447066191  | 0.991002544  |
| 1 | 7.976374661   | -9.109029175  | -0.064806263 |
| 1 | 5.377682063   | -10.076682265 | -1.974788225 |
| 6 | 4.683791687   | -4.956840085  | 4.704087344  |
| 1 | 5.482593981   | -2.297526967  | 7.681998815  |
| 1 | 8.191555869   | -3.483828913  | 6.066267977  |
| 8 | 5.749519666   | -5.511945205  | 2.315804397  |
| 1 | 2.720816140   | -6.703978689  | 0.131044938  |
| 1 | 3.944494976   | -8.989143069  | 2.279241979  |
| 1 | 4.746447442   | -6.625214910  | 5.936693246  |
| 1 | 2.699781600   | -4.366805271  | 4.503296399  |
| 1 | -8.660712471  | -6.096872090  | 6.520423935  |
| 6 | -8.180412155  | -4.493613443  | 5.295881494  |
| 6 | -10.442022990 | -3.916971117  | 3.617627182  |
| 8 | -5.985092908  | -5.055714328  | 3.854504335  |
| 1 | -7.705633618  | -2.910913126  | 6.534107440  |
| 7 | -10.212158611 | -1.570041043  | 2.130478969  |
| 1 | -12.164202093 | -3.869665606  | 4.789665476  |
| 1 | -10.648793029 | -5.484772835  | 2.283216072  |
| 6 | -5.721653767  | -7.675993266  | 3.350348117  |
| 6 | -12.183936502 | -1.570086397  | 0.149832594  |
| 6 | -10.482406435 | 0.686573356   | 3.749894773  |
| 6 | -3.354199379  | -8.090398837  | 1.796131640  |
| 1 | -7.387458564  | -8.403739973  | 2.342283238  |
| 1 | -5.551627561  | -8.722266516  | 5.136188310  |
| 6 | -11.624573830 | 0.193950137   | -2.051805897 |
| 1 | -14.043287035 | -1.104346419  | 0.962890980  |
| 1 | -12.317470209 | -3.491189395  | -0.605434192 |
| 1 | -11.132186826 | 2.263481664   | 2.582628037  |
| 1 | -11.961515753 | 0.366487789   | 5.175360440  |
| 6 | -8.001933205  | 1.527144263   | 5.028615658  |
| 8 | -3.575170708  | -7.105441527  | -0.692994645 |
| 1 | -1.769303200  | -7.105122163  | 2.688962919  |
| 1 | -2.905512289  | -10.112974453 | 1.723501911  |
| 8 | -9.478703042  | -0.641433472  | -3.442018725 |
| 1 | -13.285104402 | 0.279773933   | -3.289402565 |
| 1 | -11.232572850 | 2.125805677   | -1.431743336 |
| 1 | -6.386699365  | 0.516422428   | 4.202155335  |
| 1 | -8.034324998  | 1.134661403   | 7.053513746  |
| 6 | -4.694755878  | -8.804957146  | -2.446875792 |
| 6 | -10.116464776 | -2.346535121  | -5.417965352 |
| 6 | -5.338198128  | -7.321408861  | -4.796986274 |
| 1 | -6.425890392  | -9.633371445  | -1.661269455 |
| 1 | -3.367831862  | -10.333522719 | -2.895817995 |
| 6 | -7.828787061  | -3.886754398  | -6.148510742 |
| 1 | -10.803773236 | -1.286523563  | -7.062958597 |
| 1 | -11.612729027 | -3.642405269  | -4.799873775 |
| 8 | -7.247996786  | -5.563336303  | -4.146155195 |
| 1 | -3.647766422  | -6.329780818  | -5.493078180 |
| 1 | -6.004787632  | -8.602631743  | -6.287704179 |
| 1 | -8.261409591  | -4.952746939  | -7.876884367 |
| 1 | -6.206822017  | -2.645571031  | -6.552432113 |
| 8 | 7.503587895   | 4.418065978   | -0.630452274 |
| 8 | -7.580237071  | 4.174113691   | 4.869438368  |
| 1 | 2.208980077   | -2.031255127  | 1.208893620  |
| 1 | 1.845389237   | -0.918794224  | -0.500629988 |
| 6 | 1.924098215   | 1.078139699   | 0.058449225  |
| 6 | -0.760559908  | -1.573383968  | -1.546107663 |
| 1 | -1.212586144  | -0.348057291  | -3.158814940 |
| 1 | -0.769029660  | -3.530121530  | -2.231193806 |
| 6 | -2.784528252  | -1.299878257  | 0.477320218  |
| 1 | -2.917504490  | 0.649513940   | 1.146243534  |
| 1 | -2.426330691  | -2.536703916  | 2.091393767  |
| 7 | -5.281990118  | -2.049458857  | -0.558094666 |
| 1 | -6.807051903  | -1.894314243  | 0.695764984  |
| 1 | -5.810790252  | -1.025076193  | -2.116787904 |
| 1 | -5.232970626  | -3.932207977  | -1.080250523 |
| 6 | 3.908352077   | -1.505357612  | -2.412985446 |
| 1 | 3.801206503   | -0.288392973  | -4.077911520 |
| 1 | 3.811000953   | -3.467114286  | -3.036770766 |
| 7 | 6.438406047   | -1.166104554  | -1.241757844 |
| 1 | 7.901530173   | -1.936787725  | -2.285784210 |
| 1 | 6.888053118   | 0.700268201   | -0.905437641 |
| 1 | 6.504892277   | -2.052282108  | 0.499288283  |

C5TB--A3

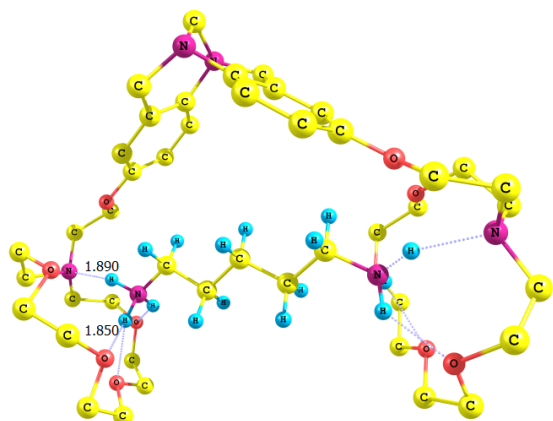

|  |  |  |  |   |               |               |              |
|--|--|--|--|---|---------------|---------------|--------------|
|  |  |  |  | 6 | -7.710112269  | -6.196235772  | 5.449194963  |
|  |  |  |  | 6 | -10.635801162 | -7.797219188  | -2.838831418 |
|  |  |  |  | 6 | -7.506840114  | -8.076103060  | 3.314339389  |
|  |  |  |  | 1 | -9.709746611  | -5.855671244  | 5.881934656  |
|  |  |  |  | 1 | -6.777386985  | -6.934311721  | 7.148451690  |
|  |  |  |  | 6 | -8.717670702  | -8.672428773  | -0.916721195 |
|  |  |  |  | 1 | -10.630447569 | -9.063106944  | -4.481819663 |
|  |  |  |  | 1 | -12.518049505 | -7.860683746  | -1.971793009 |
|  |  |  |  | 8 | -8.998206195  | -7.181274341  | 1.283855270  |
|  |  |  |  | 1 | -5.519407733  | -8.255088457  | 2.728444964  |
|  |  |  |  | 1 | -8.174892266  | -9.938605656  | 3.944003647  |
|  |  |  |  | 1 | -9.048353853  | -10.677097344 | -0.486067760 |
|  |  |  |  | 1 | -6.788364403  | -8.485699278  | -1.674559898 |
|  |  |  |  | 1 | 12.711317451  | 2.309804517   | -4.545308787 |
|  |  |  |  | 6 | 11.666043867  | 1.749755874   | -2.843168339 |
|  |  |  |  | 6 | 13.236642379  | -0.154373606  | -1.368244764 |
|  |  |  |  | 8 | 9.270774602   | 0.735173329   | -3.522589082 |
|  |  |  |  | 1 | 11.302664677  | 3.443989709   | -1.724136859 |
|  |  |  |  | 7 | 12.197960158  | -0.732125201  | 1.148371365  |
|  |  |  |  | 1 | 15.196968530  | 0.537904833   | -1.22019656  |
|  |  |  |  | 1 | 13.289753128  | -1.923896014  | -2.442582334 |
|  |  |  |  | 6 | 9.303512215   | -0.442600283  | -5.925301978 |
|  |  |  |  | 6 | 13.414567640  | -3.013657528  | 2.172111523  |
|  |  |  |  | 6 | 12.435434464  | 1.422729343   | 2.903647129  |
|  |  |  |  | 6 | 6.791008130   | -1.744576135  | -6.352368713 |
|  |  |  |  | 1 | 10.858567731  | -1.815773452  | -6.053587916 |
|  |  |  |  | 1 | 9.596366831   | 0.977470216   | -7.413372376 |
|  |  |  |  | 6 | 11.981803851  | -4.189314647  | 4.378559366  |
|  |  |  |  | 1 | 15.369026192  | -2.599580769  | 2.761673906  |
|  |  |  |  | 1 | 13.518872955  | -4.417330874  | 0.654629428  |
|  |  |  |  | 1 | 13.555397579  | 0.883429892   | 4.561622792  |
|  |  |  |  | 1 | 13.455686187  | 2.973512189   | 1.983996859  |
|  |  |  |  | 6 | 9.907160616   | 2.429426062   | 3.821963253  |
|  |  |  |  | 8 | 6.423588706   | -3.841686323  | -4.715665696 |
|  |  |  |  | 1 | 5.254352876   | -0.418802963  | -5.952973235 |
|  |  |  |  | 1 | 6.637983788   | -2.354296226  | -8.328356913 |
|  |  |  |  | 8 | 9.793353758   | -5.515896622  | 3.560595252  |
|  |  |  |  | 1 | 13.233934401  | -5.474727051  | 5.416873090  |
|  |  |  |  | 1 | 11.333482328  | -2.747111677  | 5.711827192  |
|  |  |  |  | 1 | 10.223997744  | 4.045884444   | 5.079936836  |
|  |  |  |  | 1 | 8.847895500   | 0.980376615   | 4.871588877  |
|  |  |  |  | 6 | 7.565748542   | -6.120614607  | -5.551567089 |
|  |  |  |  | 6 | 10.294520428  | -8.020569683  | 2.741331005  |
|  |  |  |  | 6 | 7.262215084   | -8.045090767  | -3.468263240 |
|  |  |  |  | 1 | 9.582872298   | -5.839189054  | -5.944029162 |
|  |  |  |  | 1 | 6.636216895   | -6.782640423  | -7.283540642 |
|  |  |  |  | 6 | 8.366731579   | -8.767257112  | 0.774989856  |
|  |  |  |  | 1 | 10.208929069  | -9.319875352  | 4.355691792  |
|  |  |  |  | 1 | 12.183705955  | -8.150327718  | 1.897664727  |
|  |  |  |  | 8 | 8.752804488   | -7.253788796  | -1.394200150 |
|  |  |  |  | 1 | 5.260609758   | -8.164759555  | -2.917334415 |
|  |  |  |  | 1 | 7.872881927   | -9.914987861  | -4.132840186 |
|  |  |  |  | 1 | 8.607212439   | -10.777980366 | 0.313067125  |
|  |  |  |  | 1 | 6.436147825   | -8.501092986  | 1.506816481  |
|  |  |  |  | 8 | -8.422950927  | 3.406314242   | -1.516047792 |
|  |  |  |  | 8 | 8.528382519   | 3.185416613   | 1.652385853  |
|  |  |  |  | 6 | -0.040948472  | -0.785630903  | -0.014987417 |
|  |  |  |  | 1 | 0.027419924   | 0.475895365   | -1.662798243 |
|  |  |  |  | 1 | -0.106624009  | 0.436638197   | 1.661787240  |
|  |  |  |  | 6 | -2.435068784  | -2.395401545  | -0.113425133 |
|  |  |  |  | 1 | -2.618597082  | -3.490932393  | 1.637666777  |
|  |  |  |  | 1 | -2.305545075  | -3.752398660  | -1.678309114 |
|  |  |  |  | 6 | -4.765495880  | -0.754405071  | -0.456586145 |
|  |  |  |  | 1 | -4.951923018  | 0.648733483   | 1.047354173  |
|  |  |  |  | 1 | -4.703769870  | 0.247960396   | -2.261658078 |
|  |  |  |  | 7 | -7.102516231  | -2.291440160  | -0.396972849 |
|  |  |  |  | 1 | -8.773321243  | -1.228093236  | -0.518835609 |
|  |  |  |  | 1 | -7.231265152  | -3.591715259  | -1.832986966 |
|  |  |  |  | 1 | -7.220729930  | -3.256290786  | 1.299594798  |
|  |  |  |  | 6 | 2.347239989   | -2.406125740  | 0.049301061  |
|  |  |  |  | 1 | 2.210304774   | -3.795860468  | 1.584760119  |
|  |  |  |  | 1 | 2.528321092   | -3.464546149  | -1.724465671 |
|  |  |  |  | 6 | 4.685685193   | -0.784944933  | 0.431016262  |
|  |  |  |  | 1 | 4.615746434   | 0.199727029   | 2.245355412  |
|  |  |  |  | 1 | 4.895242577   | 0.632684040   | -1.056662963 |
|  |  |  |  | 7 | 7.012315830   | -2.337609945  | 0.375135175  |
|  |  |  |  | 1 | 7.137472382   | -3.282678920  | -1.331595418 |
|  |  |  |  | 1 | 8.683665083   | -1.285762004  | 0.521381069  |
|  |  |  |  | 1 | 7.122976294   | -3.657097889  | 1.796509585  |
|  |  |  |  | 6 | -2.106713775  | 8.045937364   | -2.092140208 |
|  |  |  |  | 6 | -3.100762558  | 6.945054813   | -4.270569085 |
|  |  |  |  | 6 | -5.197954003  | 5.361504119   | -4.171742085 |
|  |  |  |  | 6 | -6.343494559  | 4.901799926   | -1.838964169 |
|  |  |  |  | 6 | -5.330907565  | 5.943365868   | 0.358488579  |
|  |  |  |  | 6 | -3.212046631  | 7.497690060   | 0.259179699  |
|  |  |  |  | 6 | 2.381011282   | 8.056276055   | 2.082701027  |
|  |  |  |  | 6 | 3.467010351   | 7.395916978   | -0.249247299 |
|  |  |  |  | 6 | 5.533807445   | 5.772610228   | -0.295917862 |
|  |  |  |  | 6 | 6.510449961   | 4.768595031   | 1.935495152  |
|  |  |  |  | 6 | 5.387295099   | 5.344655322   | 4.251942056  |
|  |  |  |  | 6 | 3.344102573   | 7.000629764   | 4.297195324  |
|  |  |  |  | 7 | -0.018109244  | 9.756602367   | -2.311475035 |
|  |  |  |  | 7 | 0.339636672   | 9.830428292   | 2.242159885  |
|  |  |  |  | 6 | 2.415449648   | 8.478956736   | -2.690355647 |
|  |  |  |  | 6 | 0.182645796   | 11.341099814  | -0.061351844 |
|  |  |  |  | 6 | -2.127574460  | 8.631788325   | 2.662546439  |
|  |  |  |  | 1 | -2.228476380  | 7.374377881   | -6.079299528 |
|  |  |  |  | 1 | -5.930954148  | 4.537394615   | -5.898267558 |
|  |  |  |  | 1 | -6.228795751  | 5.493182115   | 2.153442919  |
|  |  |  |  | 1 | 6.412753017   | 5.224844804   | -2.073766403 |
|  |  |  |  | 1 | 6.094285055   | 4.551055444   | 6.003606553  |
|  |  |  |  | 1 | 2.488136069   | 7.520211815   | 6.090078525  |
|  |  |  |  | 1 | 3.752236143   | 9.850043648   | -3.483902612 |
|  |  |  |  | 1 | 2.178039593   | 6.978123128   | -4.091829352 |
|  |  |  |  | 1 | 1.875817605   | 12.513170233  | -0.234057681 |
|  |  |  |  | 1 | -1.476195361  | 12.566454836  | 0.069558924  |
|  |  |  |  | 1 | -3.426133689  | 10.063393712  | 3.411609255  |
|  |  |  |  | 1 | -1.928518284  | 7.171784137   | 4.112196819  |
|  |  |  |  | 1 | -12.589709804 | 2.410252902   | 4.692471199  |
|  |  |  |  | 6 | -11.575255761 | 1.859195576   | 2.968797323  |
|  |  |  |  | 6 | -13.220048695 | 0.048354309   | 1.457946277  |
|  |  |  |  | 8 | -9.210556594  | 0.749862170   | 3.602571735  |
|  |  |  |  | 1 | -11.164079732 | 3.568507534   | 1.889822365  |
|  |  |  |  | 7 | -12.221751809 | -0.492035515  | -1.083748406 |
|  |  |  |  | 1 | -15.157238931 | 0.808349189   | 1.347603287  |
|  |  |  |  | 1 | -13.322520976 | -1.748960300  | 2.481614624  |
|  |  |  |  | 6 | -9.257246054  | -0.478867904  | 5.979034446  |
|  |  |  |  | 6 | -13.545965957 | -2.683255946  | -2.173661098 |
|  |  |  |  | 6 | -12.376068722 | 1.725225341   | -2.770672781 |
|  |  |  |  | 6 | -6.783058052  | -1.870205119  | 6.345663965  |
|  |  |  |  | 1 | -10.854461356 | -1.804023136  | 6.093820182  |
|  |  |  |  | 1 | -9.488357652  | 0.916146718   | 7.501435497  |
|  |  |  |  | 6 | -12.159623287 | -3.869650488  | -4.402995413 |
|  |  |  |  | 1 | -15.472488690 | -2.153524178  | -2.761203364 |
|  |  |  |  | 1 | -13.733509923 | -4.119009281  | -0.695188617 |
|  |  |  |  | 1 | -13.520135292 | 1.277490673   | -4.439213901 |
|  |  |  |  | 1 | -13.334008621 | 3.286953480   | -1.803788810 |
|  |  |  |  | 6 | -9.818328376  | 2.659698622   | -3.678459351 |
|  |  |  |  | 8 | -6.503070581  | -3.936580803  | 4.653489931  |
|  |  |  |  | 1 | -5.209229998  | -0.584771928  | 5.959687432  |
|  |  |  |  | 1 | -6.626806059  | -2.533557523  | 8.304024801  |
|  |  |  |  | 8 | -10.029652654 | -5.300775884  | -3.608736021 |
|  |  |  |  | 1 | -13.462007321 | -5.080335568  | -5.469063542 |
|  |  |  |  | 1 | -11.450284402 | -2.427827354  | -5.705411572 |
|  |  |  |  | 1 | -10.087189141 | 4.270559636   | -4.955020279 |
|  |  |  |  | 1 | -8.794820656  | 1.172429467   | -4.710939491 |

C5TB--A4

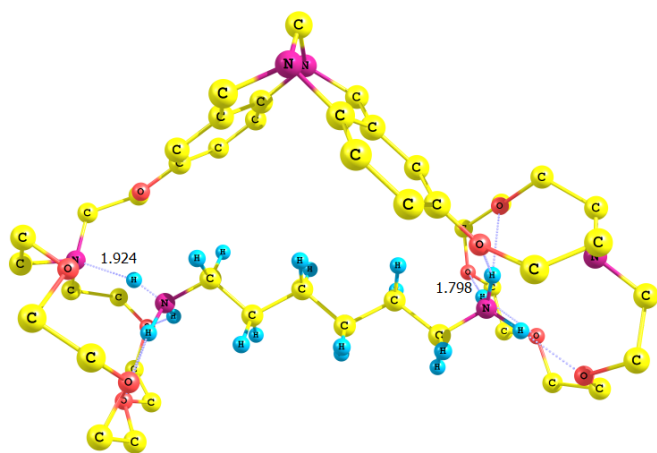

|   |               |              |              |
|---|---------------|--------------|--------------|
| 6 | -2.455309639  | 7.265469193  | -2.462981926 |
| 6 | -3.312990124  | 6.079771959  | -4.654824078 |
| 6 | -5.503730566  | 4.623105027  | -4.659537054 |
| 6 | -6.879645727  | 4.383756113  | -2.422279118 |
| 6 | -6.021643988  | 5.528115590  | -0.209869189 |
| 6 | -3.810592772  | 6.949480551  | -0.200858975 |
| 6 | 1.588380834   | 7.237752581  | 2.126977307  |
| 6 | 2.847012042   | 6.362180170  | -0.034740723 |
| 6 | 4.786936711   | 4.598001907  | 0.221451319  |
| 6 | 5.436958988   | 3.649865907  | 2.589200504  |
| 6 | 4.109490731   | 4.425534175  | 4.735281051  |
| 6 | 2.222066429   | 6.232694256  | 4.484442603  |
| 7 | -0.234845697  | 8.815025606  | -2.576699967 |
| 7 | -0.305717981  | 9.165259862  | 1.978116032  |
| 6 | 2.123857369   | 7.353084448  | -2.629481904 |
| 6 | -0.128998365  | 10.527773086 | -0.415879557 |
| 6 | -2.889160490  | 8.182315109  | 2.221136684  |
| 1 | -2.252071498  | 6.334928432  | -6.394392439 |
| 1 | -6.122579922  | 3.716716854  | -6.390136776 |
| 1 | -7.103126612  | 5.237730846  | 1.516042123  |
| 1 | 5.796018264   | 3.899581858  | -1.431195316 |
| 1 | 4.530226884   | 3.642571565  | 6.581821132  |
| 1 | 1.217741317   | 6.901421040  | 6.146040870  |
| 1 | 3.628372164   | 8.575262842  | -3.364846095 |
| 1 | 1.912285537   | 5.781342652  | -3.955871126 |
| 1 | 1.656454433   | 11.565657843 | -0.489939808 |
| 1 | -1.696172694  | 11.870529226 | -0.519765354 |
| 1 | -4.136740580  | 9.757838248  | 2.729546674  |
| 1 | -2.953012441  | 6.826650252  | 3.780419517  |
| 1 | -13.721228593 | 3.131313758  | 3.674116761  |
| 6 | -12.607371183 | 2.328352178  | 2.118433856  |
| 6 | -14.224780098 | 0.405221503  | 0.717889896  |
| 8 | -10.350123726 | 1.224784326  | 3.075665107  |
| 1 | -12.035124360 | 3.870841016  | 0.874332751  |
| 7 | -13.063061598 | -0.533369491 | -1.630032284 |
| 1 | -16.097398397 | 1.238549090  | 0.339893675  |
| 1 | -14.519643493 | -1.223913162 | 1.961828484  |
| 6 | -10.633282158 | 0.303170630  | 5.572554386  |
| 6 | -14.407165112 | -2.804818240 | -2.509760203 |
| 6 | -12.965823858 | 1.422241794  | -3.617869067 |
| 6 | -8.229393853  | -1.052282578 | 6.331772589  |
| 1 | -12.261434165 | -0.982345709 | 5.704890007  |
| 1 | -10.968511989 | 1.879542255  | 6.884016663  |
| 6 | -12.913911195 | -4.363091959 | -4.418957928 |
| 1 | -16.249801019 | -2.292689269 | -3.335058345 |
| 1 | -14.790872085 | -3.998051700 | -0.863224942 |
| 1 | -13.977649292 | 0.780842337  | -5.308769425 |
| 1 | -13.931165812 | 3.137893783  | -2.969479514 |
| 6 | -10.292300000 | 2.131325566  | -4.392947740 |
| 8 | -7.857898290  | -3.335952185 | 4.966676109  |
| 1 | -6.602802760  | 0.150189752  | 5.902585581  |
| 1 | -8.246429733  | -1.441205194 | 8.368044938  |
| 8 | -10.942378968 | -5.770767745 | -3.258273108 |
| 1 | -14.195143526 | -5.649711898 | -5.420106411 |
| 1 | -12.015552468 | -3.152949230 | -5.835829121 |
| 1 | -10.361594362 | 3.622969437  | -5.830462299 |
| 1 | -9.273199120  | 0.501735478  | -5.187995148 |

|   |               |               |              |
|---|---------------|---------------|--------------|
| 6 | -9.147511555  | -5.462387141  | 5.975338142  |
| 6 | -11.754074862 | -8.083132841  | -2.166899658 |
| 6 | -8.882537957  | -7.599869434  | 4.104789093  |
| 1 | -11.157339079 | -5.040256370  | 6.267030577  |
| 1 | -8.308291803  | -5.994386580  | 7.795915278  |
| 6 | -9.988411274  | -8.771756550  | -0.033858221 |
| 1 | -11.754156120 | -9.578284043  | -3.604797832 |
| 1 | -13.675192979 | -7.903807293  | -1.409522048 |
| 8 | -10.280275674 | -6.966127147  | 1.915868458  |
| 1 | -6.874316700  | -7.867292118  | 3.631745325  |
| 1 | -9.597423188  | -9.362055926  | 4.938887688  |
| 1 | -10.457870232 | -10.673310333 | 0.657908103  |
| 1 | -8.018194297  | -8.798664358  | -0.704346229 |
| 1 | 11.769033933  | 4.802494825   | -3.180061129 |
| 6 | 11.086094520  | 3.494090125   | -1.720863854 |
| 6 | 13.340777619  | 2.326430326   | -0.371771463 |
| 8 | 9.471214058   | 1.655199655   | -2.827785969 |
| 1 | 9.914237639   | 4.577732706   | -0.406839108 |
| 7 | 12.636081790  | 0.832588704   | 1.853843872  |
| 1 | 14.674623701  | 3.854846375   | 0.119927680  |
| 1 | 14.324155119  | 1.071493533   | -1.692364896 |
| 6 | 10.213821570  | 0.945031180   | -5.302850803 |
| 6 | 14.768206711  | -0.726397442  | 2.686678240  |
| 6 | 11.651925724  | 2.415328706   | 3.916441994  |
| 6 | 8.338000185   | -0.967690884  | -6.317871765 |
| 1 | 12.133006497  | 0.148022237   | -5.298279556 |
| 1 | 10.219987746  | 2.612326971   | -6.541178795 |
| 6 | 13.970273692  | -2.906168024  | 4.385844260  |
| 1 | 16.206773848  | 0.412037744   | 3.679925779  |
| 1 | 15.681460259  | -1.518398611  | 1.006636247  |
| 1 | 12.891378102  | 2.307482044   | 5.579665425  |
| 1 | 11.632699651  | 4.406415817   | 3.342530321  |
| 6 | 8.994147063   | 1.686198720   | 4.741228019  |
| 8 | 8.530980893   | -3.356189261  | -5.100153125 |
| 1 | 6.417411191   | -0.284023926  | -5.971328144 |
| 1 | 8.597331062   | -1.196814491  | -8.361153108 |
| 8 | 12.568161259  | -4.762152955  | 3.032157945  |
| 1 | 15.643881168  | -3.782870491  | 5.239297429  |
| 1 | 12.755149646  | -2.256083387  | 5.927497839  |
| 1 | 8.384113278   | 2.923882315   | 6.277403283  |
| 1 | 8.935181943   | -0.270351759  | 5.417060173  |
| 6 | 10.374924490  | -4.996907945  | -6.160272397 |
| 6 | 14.117834835  | -6.570225773  | 1.788591633  |
| 6 | 10.863469680  | -7.098441982  | -4.292329280 |
| 1 | 12.143993364  | -3.978258710  | -6.523449386 |
| 1 | 9.672845931   | -5.771440488  | -7.950353134 |
| 6 | 12.606095618  | -7.847013468  | -0.266262392 |
| 1 | 14.785561954  | -7.974184468  | 3.160768917  |
| 1 | 15.766966580  | -5.653185215  | 0.928857015  |
| 8 | 12.097526891  | -6.041527685  | -2.170348408 |
| 1 | 9.062643961   | -7.972950477  | -3.726382802 |
| 1 | 12.049425806  | -8.557828230  | -5.174005506 |
| 1 | 13.708539083  | -9.428523258  | -1.039683775 |
| 1 | 10.833400360  | -8.612925081  | 0.506688450  |
| 8 | -9.048597628  | 3.007200334   | -2.188722214 |
| 8 | 7.308067396   | 1.849529627   | 2.638966438  |
| 1 | 4.030339558   | -2.999435450  | -2.332759019 |
| 6 | 3.848419417   | -2.506589243  | -0.325713171 |
| 1 | 4.004746999   | -0.443919311  | -0.187744277 |
| 6 | 6.013058963   | -3.690152976  | 1.144463412  |
| 1 | 5.900134607   | -3.199808766  | 3.148355307  |
| 1 | 6.016114650   | -5.749260774  | 0.972730783  |
| 6 | 1.280026685   | -3.364553188  | 0.671621844  |
| 1 | 1.244955261   | -3.198943271  | 2.739832453  |
| 1 | 1.005581780   | -5.374284335  | 0.235044118  |
| 6 | -0.899745786  | -1.823381489  | -0.424816071 |
| 1 | -0.712608111  | -1.711005153  | -2.488742671 |
| 1 | -0.783019302  | 0.127195567   | 0.282738913  |
| 6 | -3.474238553  | -2.952783785  | 0.232079138  |
| 1 | -3.609064833  | -3.318113172  | 2.269092260  |
| 1 | -3.685615743  | -4.782718843  | -0.725365652 |
| 6 | -5.608421385  | -1.194265251  | -0.546316004 |
| 1 | -5.653154979  | 0.499224032   | 0.633012853  |
| 1 | -5.408545068  | -0.599511790  | -2.516636916 |
| 7 | -8.098535997  | -2.439479404  | -0.269741377 |
| 1 | -9.640605316  | -1.258631208  | -0.641664018 |
| 1 | -8.346254508  | -3.964165134  | -1.449824235 |
| 1 | -8.336142584  | -3.060175023  | 1.570178993  |
| 7 | 8.468013333   | -2.743955835  | 0.182526744  |
| 1 | 10.008168359  | -3.472246782  | 1.148401601  |
| 1 | 8.708048218   | -3.163414533  | -1.713331406 |
| 1 | 8.574675137   | -0.805654440  | 0.319276765  |

C5TB...A5

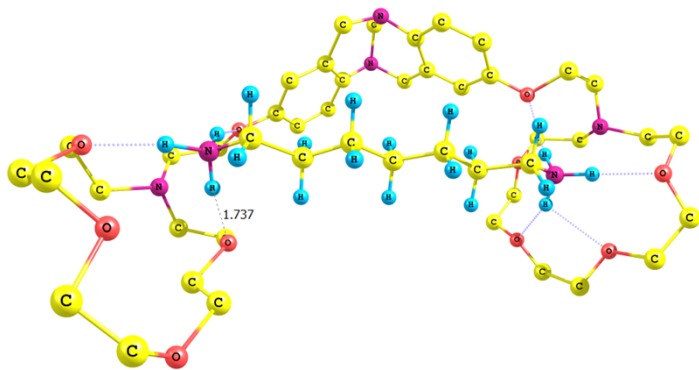

|   |               |               |              |
|---|---------------|---------------|--------------|
| 6 | -10.444504201 | -8.060023382  | 3.528352747  |
| 1 | -11.396761693 | -5.375692181  | 6.399432338  |
| 1 | -8.617551130  | -7.165377966  | 7.053390914  |
| 6 | -12.800015520 | -8.332525649  | -0.234322243 |
| 1 | -15.556619291 | -8.176730969  | -3.213016061 |
| 1 | -16.305079284 | -6.357743093  | -0.482159807 |
| 8 | -12.097247212 | -6.804462979  | 1.843240619  |
| 1 | -8.749372746  | -8.725271180  | 2.522638686  |
| 1 | -11.383030944 | -9.703143908  | 4.383890283  |
| 1 | -13.603940860 | -10.130696303 | 0.424986147  |
| 1 | -11.142236389 | -8.760384179  | -1.415829954 |
| 1 | 18.018724384  | 0.736237245   | -1.441350703 |
| 6 | 16.012774578  | 0.946236825   | -0.961936669 |
| 6 | 15.596464163  | 0.116940024   | 1.761636582  |
| 8 | 14.520488200  | -0.467618365  | -2.690034393 |
| 1 | 15.513376691  | 2.930218567   | -1.248974708 |
| 7 | 13.062466334  | 0.721648561   | 2.735786549  |
| 1 | 17.087274665  | 0.957928560   | 2.954792563  |
| 1 | 15.847336627  | -1.936251042  | 1.841649470  |
| 6 | 15.716233107  | -2.649509220  | -3.687399645 |
| 6 | 12.447670440  | -0.805928450  | 4.975504909  |
| 6 | 12.916464215  | 3.433097329   | 3.295272054  |
| 6 | 13.764482532  | -4.093129484  | -5.211639399 |
| 1 | 16.470817701  | -3.842727562  | -2.163345084 |
| 1 | 17.295063265  | -2.072128010  | -4.903614063 |
| 6 | 9.739067599   | -1.791023710  | 4.999302228  |
| 1 | 12.772478433  | 0.252401252   | 6.738698625  |
| 1 | 13.724216250  | -2.432139708  | 5.050005466  |
| 1 | 14.189960007  | 3.932306243   | 4.872318311  |
| 1 | 13.545684388  | 4.494102882   | 1.638413219  |
| 6 | 10.302145473  | 4.388059019   | 3.973368099  |
| 8 | 12.099626377  | -5.538027203  | -3.688023254 |
| 1 | 12.607393860  | -2.734478859  | -6.261805484 |
| 1 | 14.716010589  | -5.319642909  | -6.586713633 |
| 8 | 9.114726699   | -3.257946186  | 2.839164009  |
| 1 | 9.450531007   | -2.930091955  | 6.710528479  |
| 1 | 8.354915122   | -0.257879567  | 4.997189514  |
| 1 | 10.418061265  | 6.410007245   | 4.408460501  |
| 1 | 9.539967959   | 3.422879580   | 5.638915894  |
| 6 | 13.081327690  | -7.978009274  | -3.134055750 |
| 6 | 10.605183822  | -5.444986544  | 2.406949661  |
| 6 | 11.001109762  | -9.741012127  | -2.246621529 |
| 1 | 14.570751132  | -7.878309220  | -1.688043093 |
| 1 | 13.911792342  | -8.783620250  | -4.859128023 |
| 6 | 8.952321758   | -7.242994681  | 0.893706222  |
| 1 | 11.164160990  | -6.319402443  | 4.202298954  |
| 1 | 12.318171298  | -4.958973586  | 1.332916336  |
| 8 | 10.304061655  | -9.466841232  | 0.314251983  |
| 1 | 9.349606411   | -9.511807262  | -3.486115481 |
| 1 | 11.686806286  | -11.682017720 | -2.427555233 |
| 1 | 7.295655675   | -7.748462368  | 2.027968893  |
| 1 | 8.293087067   | -6.293900591  | -0.830264341 |
| 8 | -8.968221912  | 2.368665702   | -1.933410784 |
| 8 | 8.683940983   | 4.028166373   | 1.847173139  |
| 1 | 4.704807330   | 0.823202435   | -0.284150538 |
| 6 | 4.843496210   | -0.961248808  | -1.334086077 |
| 1 | 5.076091244   | -2.463176568  | 0.077132946  |
| 6 | 7.180592150   | -0.880933564  | -3.009732567 |
| 1 | 7.554053028   | -2.708075607  | -3.901679454 |
| 1 | 7.014770584   | 0.548375805   | -4.491427030 |
| 6 | 2.412957100   | -1.382584004  | -2.821973172 |
| 1 | 2.522867343   | -3.192628609  | -3.831449677 |
| 1 | 2.206835238   | 0.094248194   | -4.266115001 |
| 6 | 0.097215064   | -1.376402711  | -1.098741492 |
| 1 | -0.107481945  | 0.497850201   | -0.225523679 |
| 1 | 0.396222627   | -2.725092590  | 0.450799804  |
| 6 | -2.328473120  | -2.060239744  | -2.495857489 |
| 1 | -2.085643330  | -3.902788723  | -3.421222291 |
| 1 | -2.676148687  | -0.675002564  | -4.002653183 |
| 6 | -4.627217071  | -2.163171229  | -0.757309580 |
| 1 | -4.282803171  | -3.474603270  | 0.813782151  |
| 1 | -4.976910865  | -0.292472891  | 0.072501227  |
| 6 | -6.965560230  | -3.008910536  | -2.193038348 |
| 1 | -6.798079484  | -4.970257140  | -2.818276868 |
| 1 | -7.282892466  | -1.821992540  | -3.85105267  |
| 7 | -9.235446175  | -2.814803552  | -0.565867109 |
| 1 | -10.861375864 | -3.509684144  | -1.408197351 |
| 1 | -8.999447745  | -3.761081951  | 1.128158856  |
| 1 | -9.596533127  | -0.962959010  | -0.074496778 |
| 7 | 9.417885991   | -0.248971399  | -1.431762234 |
| 1 | 9.497379204   | -1.417997470  | 0.148785686  |
| 1 | 11.155317072  | -0.395551775  | -2.321097519 |
| 1 | 9.304050787   | 1.541432481   | -0.669819046 |

|   |               |              |              |
|---|---------------|--------------|--------------|
| 6 | -2.607653679  | 6.899087228  | -2.828405799 |
| 6 | -3.559559682  | 5.573242246  | -4.903081160 |
| 6 | -5.661161748  | 4.013364150  | -4.670843285 |
| 6 | -6.840284625  | 3.797262645  | -2.319425112 |
| 6 | -5.842388360  | 5.019297419  | -0.214916647 |
| 6 | -3.726787204  | 6.570940090  | -0.445682426 |
| 6 | 1.840462722   | 7.888285084  | 1.436522453  |
| 6 | 3.056019515   | 7.026719321  | -0.756638727 |
| 6 | 5.360290915   | 5.770661921  | -0.539909833 |
| 6 | 6.417439537   | 5.295522446  | 1.822733313  |
| 6 | 5.167616342   | 6.062815448  | 4.015397495  |
| 6 | 2.899187376   | 7.366673468  | 3.795941726  |
| 7 | -0.602210319  | 8.679683431  | -3.201275193 |
| 7 | -0.398575336  | 9.398083552  | 1.299069454  |
| 6 | 1.928673241   | 7.554805139  | -3.345234519 |
| 6 | -0.615685955  | 10.566807267 | -1.189966124 |
| 6 | -2.736982746  | 8.005353609  | 1.836843897  |
| 1 | -2.669974952  | 5.837148150  | -6.734539338 |
| 1 | -6.403780598  | 3.022786794  | -6.307232607 |
| 1 | -6.754443822  | 4.746379412  | 1.607758084  |
| 1 | 6.369342231   | 5.170579433  | -2.230042962 |
| 1 | 5.961720777   | 5.699005401  | 5.868459020  |
| 1 | 1.940775046   | 8.049898230  | 5.478136117  |
| 1 | 3.163956884   | 8.857555779  | -4.382729991 |
| 1 | 1.823891715   | 5.808530140  | -4.448006796 |
| 1 | 0.972061820   | 11.856467775 | -1.483894104 |
| 1 | -2.381602766  | 11.637399400 | -1.263034269 |
| 1 | -4.172486637  | 9.361065710  | 2.469123536  |
| 1 | -2.395265485  | 6.705520705  | 3.408273888  |
| 1 | -12.334165938 | 3.626845265  | 4.764600150  |
| 6 | -11.851357956 | 2.715078932  | 2.963944506  |
| 6 | -14.215159503 | 1.492600072  | 1.871287932  |
| 8 | -9.853127680  | 0.956501817  | 3.338641265  |
| 1 | -11.118801897 | 4.164980645  | 1.690221947  |
| 7 | -13.865613108 | 0.482267521  | -0.687117598 |
| 1 | -15.762697689 | 2.892467510  | 1.935398776  |
| 1 | -14.772209151 | -0.080902949 | 3.095705651  |
| 6 | -9.943260051  | -0.237158722 | 5.736202767  |
| 6 | -16.006610292 | -1.132021456 | -1.383976733 |
| 6 | -13.433171992 | 2.481529587  | -2.570766227 |
| 6 | -7.794163502  | -2.122509995 | 5.932420575  |
| 1 | -11.769179442 | -1.186430447 | 6.022598300  |
| 1 | -9.728870638  | 1.186073289  | 7.233821951  |
| 6 | -15.416127612 | -2.880280668 | -3.591214482 |
| 1 | -17.696303115 | -0.001884057 | -1.851653679 |
| 1 | -16.494949502 | -2.296636906 | 0.255761184  |
| 1 | -14.889015004 | 2.416972767  | -4.047660787 |
| 1 | -13.586249246 | 4.348580753  | -1.683318778 |
| 6 | -10.863435665 | 2.291540315  | -3.849959544 |
| 8 | -8.169858036  | -4.311037567 | 4.419545633  |
| 1 | -6.050672069  | -1.238447044 | 5.258085084  |
| 1 | -7.527011049  | -2.677137013 | 7.912161772  |
| 8 | -13.643521171 | -4.786948050 | -2.908494277 |
| 1 | -17.160284228 | -3.763377968 | -4.280835966 |
| 1 | -14.577151634 | -1.839754075 | -5.169424810 |
| 1 | -10.612670916 | 3.866430395  | -5.169063873 |
| 1 | -10.692494832 | 0.513729569  | -4.909245446 |
| 6 | -9.690805887  | -6.205013549 | 5.561416341  |
| 6 | -14.770538633 | -6.933586066 | -1.751435841 |



C5TB-A6

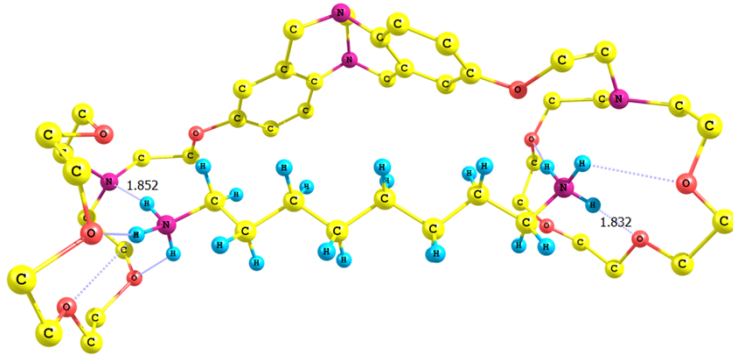

|   |               |              |              |   |               |              |              |
|---|---------------|--------------|--------------|---|---------------|--------------|--------------|
| 6 | -1.964623388  | 6.099666995  | -2.219524748 | 1 | -17.597693434 | -6.752338667 | -3.947399485 |
| 6 | -2.929874636  | 5.138367164  | -4.480347567 | 1 | -18.494693448 | -4.482787203 | -1.633592528 |
| 6 | -5.158432274  | 3.748823298  | -4.523049705 | 8 | -15.044363708 | -5.448603479 | 1.639953346  |
| 6 | -6.491429869  | 3.378414328  | -2.270936633 | 1 | -12.754459896 | -8.068098181 | 3.446697687  |
| 6 | -5.445681963  | 4.161586697  | 0.014843798  | 1 | -15.901639793 | -7.815220718 | 4.631941386  |
| 6 | -3.166462661  | 5.488006156  | 0.063916202  | 1 | -17.090311454 | -8.505000940 | 0.294725445  |
| 6 | 2.569320587   | 6.424862381  | 2.167358862  | 1 | -14.032277491 | -8.101980968 | -1.060089036 |
| 6 | 3.832496586   | 6.015099867  | -0.132581286 | 1 | 14.524401823  | 3.993282032  | -3.915223120 |
| 6 | 6.254709563   | 4.990016115  | -0.112854436 | 6 | 13.601896177  | 3.067337084  | -2.304101324 |
| 6 | 7.414555345   | 4.314429625  | 2.155421463  | 6 | 15.599276075  | 1.717963124  | -0.738202560 |
| 6 | 6.086102541   | 4.522976006  | 4.428587972  | 8 | 11.713298355  | 1.365697413  | -3.173462206 |
| 6 | 3.688486237   | 5.607066452  | 4.409303318  | 1 | 12.637096573  | 4.513901542  | -1.816672961 |
| 7 | 0.081004994   | 7.870053008  | -2.284376364 | 7 | 14.649225783  | 0.768721635  | 1.702439025  |
| 7 | 0.269478705   | 7.851127402  | 2.258031694  | 1 | 17.223457768  | 2.991262385  | -0.451092711 |
| 6 | 2.615760603   | 6.794793251  | -2.615046287 | 1 | 16.277734949  | 0.085460968  | -1.816672961 |
| 6 | 0.052626979   | 9.412420903  | -0.001687525 | 6 | 12.270982950  | 0.344359098  | -5.582431984 |
| 6 | -2.065967503  | 6.382708263  | 2.564155966  | 6 | 16.514527064  | -0.972044813 | 2.818104903  |
| 1 | -1.956144188  | 5.571860857  | -6.235560970 | 6 | 14.024128993  | 2.840961139  | 3.467314597  |
| 1 | -5.883865956  | 3.038807891  | -6.303808424 | 6 | 10.333471460  | -1.671432401 | -6.196322699 |
| 1 | -6.469796286  | 3.753016600  | 1.752565897  | 1 | 14.186452676  | -0.461960525 | -5.617469394 |
| 1 | 7.306043499   | 4.725671795  | -1.862139769 | 1 | 12.188464285  | 1.834455283  | -7.028522120 |
| 1 | 6.917285289   | 3.932495216  | 6.205625820  | 6 | 15.399790931  | -2.692840636 | 4.841629161  |
| 1 | 2.689590308   | 5.905767880  | 6.178368413  | 1 | 18.120933994  | 0.087961076  | 3.611615963  |
| 1 | 3.812777295   | 8.206359983  | -3.550103493 | 1 | 17.262556199  | -2.162377544 | 1.300346909  |
| 1 | 2.490203429   | 5.168874900  | -3.887831542 | 1 | 15.106562149  | 2.626579284  | 5.220863152  |
| 1 | 1.635829964   | 10.738844141 | -0.075311250 | 1 | 14.587662290  | 4.660394990  | 2.649915511  |
| 1 | -1.719378529  | 10.471876881 | 0.088573347  | 6 | 11.247269249  | 2.99232441   | 4.184630016  |
| 1 | -3.461276923  | 7.559688191  | 3.547563701  | 8 | 10.575225996  | -3.841786479 | -4.634333779 |
| 1 | -1.672823240  | 4.759293799  | 3.784588252  | 1 | 8.434973364   | -0.920521434 | -5.860767835 |
| 1 | -12.681091284 | 4.843305348  | 3.861575689  | 1 | 10.483540270  | -2.215182157 | -8.191790195 |
| 6 | -12.186907151 | 3.594032063  | 2.282482859  | 8 | 13.902564810  | -4.647926578 | 3.773962323  |
| 6 | -14.600051334 | 2.762921125  | 0.953901554  | 1 | 16.926663074  | -3.512976046 | 5.980457410  |
| 8 | -10.755706166 | 1.508734553  | 3.209780850  | 1 | 14.163904465  | -1.638076848 | 6.122869050  |
| 1 | -10.944276253 | 4.636939711  | 1.007320328  | 1 | 10.992046637  | 4.539626381  | 5.539882914  |
| 7 | -14.182557950 | 1.509747446  | -1.485876427 | 1 | 10.600818555  | 1.228166935  | 5.077527435  |
| 1 | -15.833524619 | 4.433283941  | 0.737592179  | 6 | 12.417542539  | -5.607170387 | -5.462838785 |
| 1 | -15.597371232 | 1.427344054  | 2.185859279  | 6 | 15.325456669  | -6.752559765 | 2.918462581  |
| 6 | -11.446272514 | 0.793429802  | 5.704644343  | 6 | 12.695245332  | -7.581994516 | -3.423635471 |
| 6 | -16.552756220 | 0.399287763  | -2.400938442 | 1 | 14.244231048  | -4.678007236 | -5.782820418 |
| 6 | -13.077124939 | 3.234980346  | -3.365868437 | 1 | 11.801164944  | -6.489300148 | -7.235910099 |
| 6 | -10.200156961 | -1.709808957 | 6.318746708  | 6 | 13.891685657  | -8.058456799 | 0.825651520  |
| 1 | -13.509673769 | 0.636748841  | 5.868922003  | 1 | 15.650973309  | -8.072268806 | 4.485999737  |
| 1 | -10.807218207 | 2.241360531  | 7.047222848  | 1 | 17.167491643  | -6.147579107 | 2.184474110  |
| 6 | -16.130028296 | -1.596200520 | -4.433151660 | 8 | 13.775809549  | -6.410717782 | -1.276721555 |
| 1 | -17.846555229 | 1.865272934  | -3.127315097 | 1 | 10.826710730  | -8.366433002 | -2.955875376 |
| 1 | -17.498316523 | -0.508495028 | -0.798337421 | 1 | 13.905257669  | -9.129948442 | -4.096300444 |
| 1 | -14.303453171 | 3.368827748  | -5.033734925 | 1 | 14.875316380  | -9.816179758 | 0.318297887  |
| 1 | -12.947004077 | 5.154582902  | -2.592764528 | 1 | 11.973012846  | -8.555638037 | 1.459864349  |
| 6 | -10.465277958 | 2.445711720  | -4.274660342 | 8 | -8.814071294  | 2.236373544  | -2.157069304 |
| 8 | -11.165238134 | -3.715326015 | 4.832356275  | 8 | 9.842411044   | 3.459704671  | 1.954258241  |
| 1 | -8.179231077  | -1.586164185 | 5.891022348  | 1 | 3.293474924   | -0.817109959 | -2.148334990 |
| 1 | -10.420011462 | -2.125174508 | 8.339893690  | 6 | 3.270913486   | -2.080382333 | -0.499917562 |
| 8 | -15.051727970 | -3.828879650 | -3.402544239 | 1 | 2.976590553   | -0.858581885 | 1.156421598  |
| 1 | -17.923788330 | -2.033507680 | -5.378371813 | 6 | 5.837414601   | -3.380260590 | -0.262790965 |
| 1 | -14.819962526 | -0.916379154 | -5.884126738 | 1 | 5.761972960   | -4.836490996 | 1.213570692  |
| 1 | -9.770435161  | 3.865243647  | -5.607642818 | 1 | 6.345798135   | -4.322122700 | -2.038560807 |
| 6 | -10.527022865 | 0.619240530  | -5.261579188 | 6 | 7.808674707   | -1.411483584 | 0.407235951  |
| 6 | -13.420799956 | -4.804350536 | 5.768473618  | 1 | 7.385742693   | -0.577337746 | 2.248048272  |
| 6 | -16.887821646 | -5.521981539 | -2.434316673 | 1 | 7.863280230   | 0.108241615  | -0.987138054 |
| 6 | -14.298441617 | -6.743156488 | 3.868006427  | 7 | 10.402599527  | -2.449888015 | 0.515150643  |
| 1 | -14.900710518 | -3.370868652 | 6.022698455  | 1 | 11.780198434  | -1.053142404 | 0.867705482  |
| 1 | -13.073952089 | -5.720952678 | 7.598767724  | 1 | 10.664725308  | -3.784129049 | 1.895370600  |
| 6 | -15.715010454 | -7.099195982 | -0.366115513 | 1 | 10.877701207  | -3.248890619 | -1.203725219 |
|   |               |              |              | 6 | 1.057607826   | -3.910992024 | -0.703391918 |
|   |               |              |              | 1 | 1.042144198   | -5.142687077 | 0.967957336  |
|   |               |              |              | 1 | 1.308068329   | -5.151357140 | -2.348746100 |
|   |               |              |              | 6 | -1.461604786  | -2.525509180 | -0.889800158 |
|   |               |              |              | 1 | -1.543643461  | -1.448172614 | -2.664196170 |
|   |               |              |              | 1 | -1.578841497  | -1.121344504 | 0.637967714  |
|   |               |              |              | 6 | -3.749598086  | -4.270569085 | -0.709316209 |
|   |               |              |              | 1 | -3.684918435  | -5.295218200 | 1.094977158  |
|   |               |              |              | 1 | -3.680080736  | -5.701033077 | -2.210480519 |
|   |               |              |              | 6 | -6.196188529  | -2.763491822 | -0.882167555 |
|   |               |              |              | 1 | -6.118978104  | -1.188597963 | 0.468995975  |
|   |               |              |              | 1 | -6.364258869  | -1.908507975 | -2.763333085 |
|   |               |              |              | 6 | -8.531096166  | -4.326077896 | -0.306710087 |
|   |               |              |              | 1 | -8.408190277  | -5.195880974 | 1.560136989  |
|   |               |              |              | 1 | -8.854003094  | -5.801587286 | -1.715347744 |
|   |               |              |              | 7 | -10.801048251 | -2.672613009 | -0.265789960 |
|   |               |              |              | 1 | -12.388121395 | -3.601220581 | 0.410616670  |
|   |               |              |              | 1 | -10.553632097 | -1.102864874 | 0.881647881  |
|   |               |              |              | 1 | -11.286756963 | -1.998449484 | -2.007661898 |

C4TB...A2\*

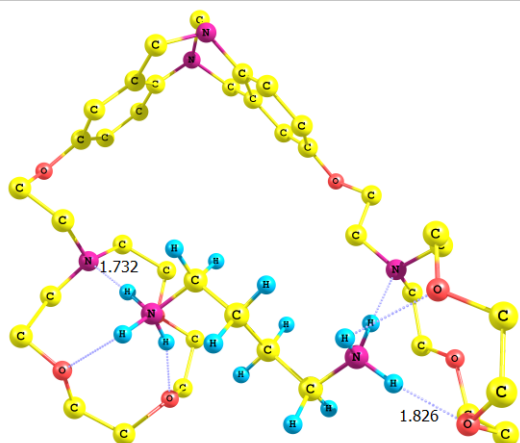

|   |               |               |              |   |               |              |              |
|---|---------------|---------------|--------------|---|---------------|--------------|--------------|
| 6 | -10.164085871 | -5.059911410  | 0.442052262  | 6 | -9.902372050  | 3.634523222  | -3.472768346 |
| 6 | -11.348558562 | -3.355282192  | 2.083099759  | 8 | 0.912680961   | 8.842842372  | 1.797926880  |
| 6 | -11.697379303 | -0.855526198  | 1.402222037  | 1 | -1.110635427  | 10.326460577 | 4.820409428  |
| 6 | -10.891717304 | -0.010259322  | -0.973369511 | 1 | 1.888864274   | 9.010935389  | 5.577205002  |
| 6 | -9.773290537  | -1.705135664  | -2.644629947 | 8 | -3.001415883  | 9.660239569  | -1.989356122 |
| 6 | -9.373292237  | -4.220444103  | -1.935621764 | 1 | -5.819120164  | 8.768270006  | -4.409668035 |
| 6 | -4.912979545  | -7.711268781  | -0.843503761 | 1 | -6.513091798  | 11.347422837 | -2.405279143 |
| 6 | -5.104384221  | -7.448103650  | 1.791647320  | 1 | -10.707518153 | 5.526244761  | -3.645880475 |
| 6 | -2.948630167  | -6.909983388  | 3.195672156  | 1 | -10.286965304 | 2.646421407  | -5.253209591 |
| 6 | -0.605532457  | -6.590649932  | 2.030149637  | 6 | 0.398524314   | 11.165234354 | 0.539477085  |
| 6 | -0.409252288  | -6.837701369  | -0.591300931 | 6 | -2.374871562  | 11.464570730 | -0.116588535 |
| 6 | -2.561533026  | -7.405212540  | -1.992761408 | 1 | 1.520309124   | 11.138466386 | -1.195620184 |
| 7 | -9.747951201  | -7.605109644  | 1.273561933  | 1 | 1.027629213   | 12.759796482 | 1.702977597  |
| 7 | -7.076377541  | -8.266332327  | -2.384155786 | 1 | -3.546452542  | 11.204850570 | 1.578006238  |
| 6 | -7.646708183  | -7.764387089  | 3.084320052  | 1 | -2.706903977  | 13.383789672 | -0.838769998 |
| 6 | -9.150606926  | -9.259806632  | -0.854673932 | 1 | 9.422468576   | -6.703022488 | -3.660011846 |
| 6 | -8.019042784  | -6.018140436  | -3.714910276 | 6 | 8.696808128   | -4.960687567 | -2.796567696 |
| 1 | -11.980377108 | -4.024921714  | 3.918435654  | 6 | 8.839567477   | -5.195933886 | 0.066752681  |
| 1 | -12.570971281 | 0.488201261   | 2.681916131  | 8 | 10.062310899  | -2.842854644 | -3.714490757 |
| 1 | -9.125046493  | -1.101090421  | -4.495423801 | 1 | 6.744613467   | -4.712642134 | -3.438655013 |
| 1 | -3.061363660  | -6.704863081  | 5.236831336  | 7 | 7.423147929   | -3.208671581 | 1.430293917  |
| 1 | 1.384927265   | -6.613124443  | -1.555072524 | 1 | 8.198700923   | -7.091414091 | 0.629545206  |
| 1 | -2.421544015  | -7.627911078  | -4.029481623 | 1 | 10.812815575  | -5.039285051 | 0.645088202  |
| 1 | -7.745425579  | -9.607049452  | 4.028119130  | 6 | 12.698941636  | -3.259038447 | -3.907316507 |
| 1 | -7.893884342  | -6.319037726  | 4.540074246  | 6 | 8.463003669   | -2.864917195 | 3.999098608  |
| 1 | -8.636263197  | -11.117178622 | -0.109715601 | 6 | 4.683026348   | -3.662910686 | 1.447292002  |
| 1 | -10.813391942 | -9.455916726  | -2.065587669 | 6 | 13.963107851  | -0.756701088 | -4.495344432 |
| 1 | -9.300069134  | -6.647538243  | -5.218194859 | 1 | 13.097055879  | -4.617467974 | -5.427143751 |
| 1 | -6.432317350  | -5.057613503  | -4.626727632 | 1 | 13.453713313  | -4.034347667 | -2.135849571 |
| 1 | -4.866341108  | 3.076271709   | 5.226290445  | 6 | 10.363548339  | -0.710259182 | 4.075721328  |
| 6 | -4.328988074  | 3.723591677   | 3.326940082  | 1 | 9.347431337   | -4.614903616 | 4.676376403  |
| 6 | -6.642606058  | 3.725774310   | 1.612622239  | 1 | 6.935103516   | -2.402015586 | 5.314081445  |
| 8 | -3.260291336  | 6.167241706   | 3.415555002  | 1 | 3.980097413   | -3.540900527 | -0.495527728 |
| 1 | -2.912717814  | 2.382196140   | 2.596963499  | 1 | 3.783841811   | -2.128356807 | 2.506392712  |
| 7 | -6.150062207  | 5.081492081   | -0.775687165 | 6 | 3.868800112   | -6.161510167 | 2.686118881  |
| 1 | -7.102034351  | 1.752715185   | 1.212714646  | 8 | 13.742100617  | 0.991817016  | -2.464132769 |
| 1 | -8.282069965  | 4.542719863   | 2.584245643  | 1 | 15.957630484  | -1.060931854 | -4.965343852 |
| 6 | -1.065775222  | 6.286105471   | 4.930079675  | 1 | 13.034445477  | 0.127890986  | -6.115404633 |
| 6 | -6.960433403  | 7.740474496   | -0.593313489 | 8 | 12.123274408  | -1.031726139 | 2.094999364  |
| 6 | -7.045624140  | 3.756306613   | -3.047837002 | 1 | 9.377466642   | 1.111550055  | 3.847875176  |
| 6 | 0.204205680   | 8.785362577   | 4.394631486  | 1 | 11.318619633  | -0.672955991 | 5.919772639  |
| 1 | 0.224558029   | 4.720879450   | 4.457527236  | 1 | 4.068835166   | -7.781780127 | 1.412906548  |
| 1 | -1.537203275  | 6.131994537   | 6.946330378  | 1 | 5.035590636   | -6.517502418 | 4.356695237  |
| 6 | -5.633622771  | 9.469050322   | -2.472464571 | 6 | 15.431468408  | 0.573335306  | -0.411325318 |
| 1 | -6.515421830  | 8.372041709   | 1.320296746  | 6 | 13.981852043  | 0.884265151  | 2.028035034  |
| 1 | -9.018248628  | 7.917706228   | -0.826061591 | 1 | 16.986680771  | 1.936738592  | -0.509698783 |
| 1 | -6.256370632  | 1.845368450   | -2.973378018 | 1 | 16.222192122  | -1.338630868 | -0.496865654 |
| 1 | -6.220881578  | 4.666587622   | -4.716708824 | 1 | 15.261718102  | 0.740988016  | 3.656062319  |
|   |               |               |              | 1 | 13.083321350  | 2.762656563  | 2.081688134  |
|   |               |               |              | 8 | -11.239011147 | 2.508153936  | -1.435588929 |
|   |               |               |              | 8 | 1.355186757   | -6.027443557 | 3.610767477  |
|   |               |               |              | 6 | 0.213913202   | 2.559926759  | -2.104687989 |
|   |               |               |              | 1 | -0.726718695  | 1.743627493  | -3.748666451 |
|   |               |               |              | 1 | -0.226827590  | 1.387191156  | -0.461336916 |
|   |               |               |              | 6 | 3.055668026   | 2.715428531  | -2.522324991 |
|   |               |               |              | 1 | 3.655911141   | 0.832152177  | -3.142723923 |
|   |               |               |              | 1 | 3.457886754   | 4.013390606  | -4.089661837 |
|   |               |               |              | 6 | 4.514680109   | 3.525009821  | -0.158517775 |
|   |               |               |              | 1 | 3.854823698   | 5.371685962  | 0.513047378  |
|   |               |               |              | 1 | 4.170725412   | 2.174031484  | 1.379133365  |
|   |               |               |              | 7 | -0.922944063  | 5.092305093  | -1.680782765 |
|   |               |               |              | 1 | -0.739578281  | 6.231547192  | -3.235218451 |
|   |               |               |              | 1 | -2.916221366  | 5.048098733  | -1.273662088 |
|   |               |               |              | 1 | -0.144172865  | 6.122088593  | -0.205010703 |
|   |               |               |              | 6 | 7.345134371   | 3.765938547  | -0.608230986 |
|   |               |               |              | 1 | 8.321062571   | 4.309062803  | 1.125806147  |
|   |               |               |              | 1 | 7.758617756   | 5.182420456  | -2.051119926 |
|   |               |               |              | 7 | 8.459522794   | 1.334439455  | -1.476709366 |
|   |               |               |              | 1 | 7.870498983   | 0.845017432  | -3.254221536 |
|   |               |               |              | 1 | 10.420482004  | 1.376655934  | -1.612726174 |
|   |               |               |              | 1 | 8.035674262   | -0.243466627 | -0.307496213 |

C4TB...A3\*

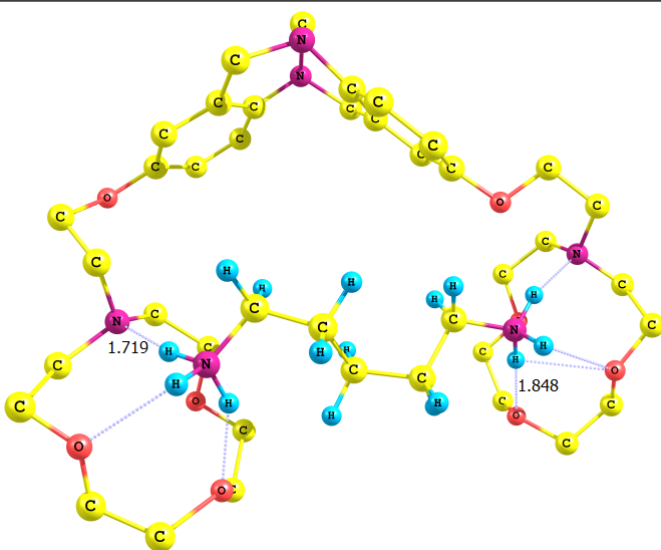

|   |               |               |              |
|---|---------------|---------------|--------------|
| 1 | 6.491293808   | -10.744296001 | 1.925296301  |
| 1 | 3.140507275   | -10.931943901 | 1.803781251  |
| 8 | 9.392032650   | -6.506458859  | -3.121987960 |
| 1 | 11.867993214  | -3.759294270  | -4.041177137 |
| 1 | 13.284751023  | -6.451985618  | -2.671722949 |
| 1 | 13.527032792  | 1.216029225   | 0.805626094  |
| 1 | 12.349688148  | 3.541161309   | -1.282800803 |
| 6 | 6.674650142   | -10.045103054 | -2.594038203 |
| 6 | 9.291606941   | -8.980045928  | -2.109138294 |
| 1 | 6.145292539   | -9.694948167  | -4.561167368 |
| 1 | 6.674789981   | -12.092292350 | -2.272412509 |
| 1 | 9.687285328   | -8.955630668  | -0.072157297 |
| 1 | 10.710785490  | -10.181204899 | -0.286139598 |
| 1 | -15.721044349 | -2.345820805  | -2.105821825 |
| 6 | -13.751534129 | -1.689084332  | -2.066851895 |
| 6 | -13.457534339 | 0.215485454   | 0.070817481  |
| 8 | -12.092891393 | -3.782056020  | -1.836730513 |
| 1 | -13.345726811 | -0.838686850  | -3.907760592 |
| 7 | -11.049647374 | 1.619423363   | 0.226687083  |
| 1 | -15.061486515 | 1.544565647   | 0.008174955  |
| 1 | -13.574453576 | -0.797284843  | 1.864297836  |
| 6 | -12.892281391 | -5.631067862  | -0.077386169 |
| 6 | -10.442193066 | 2.489655408   | 2.639556033  |
| 6 | -11.098710330 | 3.638085355   | -1.836947831 |
| 6 | -10.771311523 | -7.533118643  | 0.226683971  |
| 1 | -14.599909604 | -6.590081124  | -0.770609471 |
| 1 | -13.334454596 | -4.767527336  | 1.757823115  |
| 6 | -8.531336161  | 0.742102955   | 3.880130909  |
| 1 | -12.164047136 | 2.604548859   | 3.789405164  |
| 1 | -9.629830099  | 4.386048350   | 2.602923694  |
| 1 | -12.693325370 | 4.946491946   | -1.539023081 |
| 1 | -11.373688138 | 2.745323996   | -3.682399430 |
| 6 | -8.686713211  | 5.197094178   | -1.916238844 |
| 8 | -8.597108074  | -6.434798560  | 1.370599362  |
| 1 | -11.418979201 | -9.160873808  | 1.331888325  |
| 1 | -10.164439250 | -8.199347210  | -1.632696798 |
| 8 | -9.401456713  | -1.773322647  | 3.654253851  |
| 1 | -6.691162567  | 0.943608216   | 2.924436005  |
| 1 | -8.272878338  | 1.255634102   | 5.876679328  |
| 1 | -8.621602702  | 6.257425100   | -3.696485447 |
| 1 | -8.605054372  | 6.575554801   | -0.371127066 |
| 6 | -8.735955691  | -6.151897131  | 4.043934247  |
| 6 | -7.747884112  | -3.563796447  | 4.737063063  |
| 1 | -7.606086633  | -7.629717656  | 4.952671350  |
| 1 | -10.695442804 | -6.324270377  | 4.691728537  |
| 1 | -7.661746622  | -3.353260185  | 6.801171076  |
| 1 | -5.817710428  | -3.314766467  | 3.989655647  |
| 8 | 10.869016026  | 3.429453937   | 2.346113712  |
| 8 | -6.553942004  | 3.549436420   | -1.746348698 |
| 6 | 3.584447373   | -1.376100355  | -2.498775226 |
| 1 | 4.445094729   | 0.003607025   | -3.769408084 |
| 1 | 3.543848500   | -0.558351669  | -0.599638402 |
| 6 | 0.922590684   | -2.047924400  | -3.341375698 |
| 1 | -0.110114333  | -0.255468277  | -3.441937467 |
| 1 | 0.950169345   | -2.829036968  | -5.261029278 |
| 6 | -0.397998970  | -3.877351122  | -1.531792989 |
| 1 | 0.468674722   | -5.757571789  | -1.652610730 |
| 1 | -0.139157532  | -3.215446248  | 0.421344645  |
| 7 | 5.311987629   | -3.595194245  | -2.410995564 |
| 1 | 5.938101092   | -4.114592992  | -4.166834466 |
| 1 | 6.983750732   | -3.216897558  | -1.313433261 |
| 1 | 4.560513523   | -5.226842245  | -1.638441565 |
| 6 | -3.230021705  | -4.143118405  | -2.039872277 |
| 1 | -4.024772426  | -5.556319750  | -0.749695874 |
| 1 | -3.552320141  | -4.828852723  | -3.968874331 |
| 6 | -4.614909285  | -1.647132415  | -1.651981452 |
| 1 | -4.227129954  | -0.275193237  | -3.139426351 |
| 1 | -4.089707190  | -0.783678816  | 0.152790015  |
| 7 | -7.385710567  | -2.055150712  | -1.606257642 |
| 1 | -7.900670348  | -3.488568345  | -0.370622510 |
| 1 | -8.469099925  | -0.467057116  | -1.045600507 |
| 1 | -8.061867754  | -2.613812296  | -3.330727093 |

|   |              |               |              |
|---|--------------|---------------|--------------|
| 6 | 4.536026453  | 8.105832229   | 2.044999104  |
| 6 | 5.496281266  | 7.174981553   | 4.328952169  |
| 6 | 7.577667044  | 5.591761561   | 4.365301049  |
| 6 | 8.792420704  | 4.950055969   | 2.101792929  |
| 6 | 7.850216554  | 5.862047180   | -0.179149803 |
| 6 | 5.696138686  | 7.394650861   | -0.221456989 |
| 6 | 0.078572917  | 7.785045574   | -2.172189001 |
| 6 | -1.096093986 | 7.412605148   | 0.177101340  |
| 6 | -3.304548718 | 5.971471763   | 0.302441196  |
| 6 | -4.295872516 | 4.866660471   | -1.862228586 |
| 6 | -3.052364785 | 5.108420676   | -4.175512088 |
| 6 | -0.874769278 | 6.565637519   | -4.316738870 |
| 7 | 2.445787309  | 9.826958755   | 2.088547839  |
| 7 | 2.153401345  | 9.496712131   | -2.445354562 |
| 6 | -0.008424398 | 8.616719650   | -2.547154101 |
| 6 | 2.289352013  | 11.212846000  | -0.288400532 |
| 6 | 4.625121365  | 8.274443031   | -2.735813005 |
| 1 | 4.592085175  | 7.737396133   | 6.084815638  |
| 1 | 8.332064556  | 4.864557206   | 6.128481536  |
| 1 | 8.737915337  | 5.375408722   | -1.965373610 |
| 1 | -4.274395780 | 5.715597195   | 2.098843066  |
| 1 | -3.851176527 | 4.223458216   | -5.846209386 |
| 1 | 0.062952442  | 6.858374971   | -6.119596045 |
| 1 | -1.318771737 | 10.050313028  | 3.271127025  |
| 1 | 0.212176544  | 7.191246425   | 4.028211727  |
| 1 | 0.603298801  | 12.406258985  | -0.247253638 |
| 1 | 3.960599221  | 12.408001312  | -0.506164996 |
| 1 | 5.920473728  | 9.625374125   | -3.626934082 |
| 1 | 4.437898652  | 6.669234187   | -4.026185941 |
| 1 | 6.237418571  | -3.471572150  | 5.774205157  |
| 6 | 6.501154399  | -3.432655133  | 3.713642270  |
| 6 | 8.811355758  | -1.852968928  | 3.060566196  |
| 8 | 6.768633774  | -5.897917958  | 2.734270989  |
| 1 | 4.797980270  | -2.553431771  | 2.895759413  |
| 7 | 9.534013432  | -2.129864808  | 0.377994331  |
| 1 | 8.344599108  | 0.113685915   | 3.468028914  |
| 1 | 10.410035598 | -2.354184732  | 4.280958798  |
| 6 | 4.599298259  | -7.393186323  | 3.168102943  |
| 6 | 11.596955484 | -3.969928798  | 0.058891421  |
| 6 | 9.929019076  | 0.270529393   | -0.958882871 |
| 6 | 4.765837921  | -9.688936948  | 1.482922785  |
| 1 | 2.881575130  | -6.310569864  | 2.704279148  |
| 1 | 4.468859923  | -7.962564543  | 5.160713173  |
| 6 | 11.648749094 | -5.179587757  | -2.554951111 |
| 1 | 11.307766937 | -5.4445436298 | 1.473587539  |
| 1 | 13.452949864 | -3.108355477  | 0.438595953  |
| 1 | 8.084465098  | 1.193465897   | -1.128816481 |
| 1 | 10.540781960 | -0.161930620  | -2.887395486 |
| 6 | 11.806159490 | 2.162164005   | 0.165861250  |
| 8 | 4.784336448  | -8.876186588  | -1.080794764 |

C4TB...A4\*

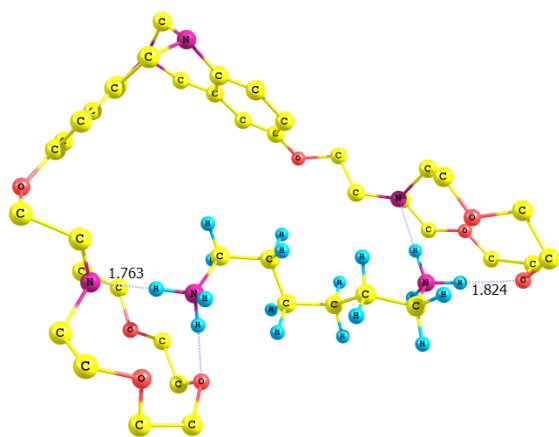

|   |               |               |              |   |               |              |               |
|---|---------------|---------------|--------------|---|---------------|--------------|---------------|
| 6 | -8.997627938  | -7.195825231  | 0.497302181  | 8 | -5.386405038  | 8.382888736  | -2.850262370  |
| 6 | -10.610191596 | -6.012408897  | 2.227996389  | 1 | -7.430657700  | 6.429819132  | -5.409327414  |
| 6 | -11.810332005 | -3.765091949  | 1.631589419  | 1 | -8.685944093  | 9.433546150  | -4.676342388  |
| 6 | -11.454558962 | -2.673102449  | -0.752252673 | 1 | -13.118390885 | 2.722622718  | -3.207087990  |
| 6 | -9.902101819  | -3.867978081  | -2.508528102 | 1 | -11.925901977 | 0.157232761  | -4.968830397  |
| 6 | -8.635310775  | -6.098601189  | -1.882278578 | 6 | -2.784875961  | 11.048651489 | -0.360886641  |
| 6 | -3.209548414  | -7.973625109  | -1.030272940 | 6 | -5.329843649  | 10.767443254 | -1.641875197  |
| 6 | -3.351674705  | -7.907405331  | 1.617323877  | 1 | -1.279467326  | 10.642171429 | -1.717819505  |
| 6 | -1.370829909  | -6.849548061  | 2.993042507  | 1 | -2.539750155  | 12.984809935 | 0.334239615   |
| 6 | 0.715514510   | -5.810860172  | 1.776191251  | 1 | -6.856623195  | 10.921300965 | -0.242941283  |
| 6 | 0.829024681   | -5.801999247  | -0.862735503 | 1 | -5.578803710  | 12.283967257 | -3.039662047  |
| 6 | -1.120607511  | -6.899805324  | -2.236469920 | 1 | 10.006726499  | -4.369543484 | -4.691205082  |
| 7 | -7.737562429  | -9.482246279  | 1.220479530  | 6 | 9.543813551   | -2.920628207 | -3.278468610  |
| 7 | -5.145268443  | -9.136838383  | -2.530114442 | 6 | 9.905403170   | -4.009562021 | -0.642091096  |
| 6 | -5.628809639  | -9.016328667  | 2.965873916  | 8 | 11.036099929  | -0.730696569 | -3.673340083  |
| 6 | -6.727233657  | -10.793409979 | -0.988477870 | 1 | 7.577937274   | -2.353332465 | -3.596566186  |
| 6 | -6.810443961  | -7.283355449  | -3.753303839 | 7 | 8.904254688   | -2.351221641 | 1.366441965   |
| 1 | -10.898246308 | -6.881522225  | 4.065955224  | 1 | 9.055472451   | -5.904658611 | -0.558155137  |
| 1 | -13.037811079 | -2.822721504  | 2.977828323  | 1 | 11.926315827  | -4.237427070 | -0.292726115  |
| 1 | -9.576946117  | -3.049683264  | -4.362693227 | 6 | 13.568979040  | -1.269610516 | -4.343671245  |
| 1 | -1.431115947  | -6.815368587  | 5.046231683  | 6 | 10.232282303  | -2.796537460 | 3.781462646   |
| 1 | 2.430739421   | -4.970567055  | -1.840451383 | 6 | 6.152086104   | -2.520284087 | 1.644764588   |
| 1 | -1.027774722  | -6.955117604  | -4.286970017 | 6 | 15.020785597  | 1.196438436  | -4.423793737  |
| 1 | -5.122151425  | -10.814338694 | 3.864330910  | 1 | 13.636189034  | -2.174023925 | -6.212814338  |
| 1 | -6.259751352  | -7.741963601  | 4.465883604  | 1 | 14.435860601  | -2.562542140 | -2.970254301  |
| 1 | -5.613803325  | -12.407224635 | -0.336656575 | 6 | 12.383981005  | -0.934174704 | 4.195080201   |
| 1 | -8.285550840  | -11.477403859 | -2.160126880 | 1 | 10.949816930  | -4.740717793 | 3.869062784   |
| 1 | -7.848334387  | -8.244764884  | -5.267985359 | 1 | 8.910160081   | -2.564244783 | 5.354440323   |
| 1 | -5.654054489  | -5.816835485  | -4.639566430 | 1 | 5.257013610   | -2.007357652 | -0.152311915  |
| 1 | -8.960245379  | 4.502243822   | 5.510714993  | 1 | 5.562979145   | -1.103046288 | 3.035644490   |
| 6 | -7.949621810  | 4.449892743   | 3.696613949  | 6 | 5.122215676   | -5.074566235 | 2.535012612   |
| 6 | -9.746467766  | 3.625994889   | 1.600367366  | 8 | 15.223383120  | 2.332551149  | -1.994615230  |
| 8 | -6.893724186  | 6.835520625   | 3.125948826  | 1 | 16.904475801  | 0.886221017  | -5.228063008  |
| 1 | -6.421659295  | 3.050053650   | 3.886529521  | 1 | 14.018909570  | 2.557494682  | -5.613793876  |
| 7 | -8.689307805  | 4.140578614   | -0.929550545 | 8 | 13.866983159  | -0.792689030 | 1.981559113   |
| 1 | -10.054504441 | 1.597224751   | 1.824231865  | 1 | 11.620507139  | 0.949842422  | 4.649986379   |
| 1 | -11.597174693 | 4.540909505   | 1.806258681  | 1 | 13.528540793  | -1.539760074 | 5.819037016   |
| 6 | -5.080539659  | 7.605245705   | 4.927396265  | 1 | 5.277849729   | -6.539442137 | 1.083863679   |
| 6 | -9.550019411  | 6.611501168   | -1.888159406 | 1 | 6.152178700   | -5.719087519 | 4.209995808   |
| 6 | -9.072606597  | 2.075332985   | -2.747200494 | 6 | 17.066081388  | 1.215201525  | -0.378997775  |
| 6 | -3.778497666  | 9.934707151   | 3.915440439  | 6 | 15.928836729  | 0.889291822  | 2.219912141   |
| 1 | -3.680481358  | 6.093217360   | 5.233187945  | 1 | 18.734021575  | 2.437994079  | -0.289993571  |
| 1 | -5.972444972  | 8.020658500   | 6.756205046  | 1 | 17.644146678  | -0.634394242 | -1.107521159  |
| 6 | -7.786443971  | 7.750629884   | -3.858506774 | 1 | 17.348211809  | 0.146775018  | 3.539898972   |
| 1 | -9.660987901  | 7.888738618   | -0.270909228 | 1 | 15.276903940  | 2.727624823  | 2.947966873   |
| 1 | -11.463365085 | 6.477039605   | -2.695571291 | 8 | -12.677846625 | -0.432773708 | -1.163840662  |
| 1 | -7.899691470  | 0.481882017   | -2.142488178 | 8 | 2.552509585   | -4.776252201 | 3.280025744   |
| 1 | -8.324851471  | 2.688940242   | -4.574625996 | 6 | -2.110177643  | 2.190969098  | 0.777270755   |
| 6 | -11.785954539 | 1.145901494   | -3.153625752 | 1 | -2.999108527  | 0.460749211  | 0.086485200   |
| 8 | -2.474342959  | 9.290894515   | 1.650155976  | 1 | -2.509803667  | 2.365634582  | 2.795447088   |
| 1 | -5.191963572  | 11.401850725  | 3.547884955  | 6 | 0.728370316   | 2.165918890  | 0.308253993   |
| 1 | -2.425083471  | 10.659434076  | 5.304651712  | 1 | 1.504975888   | 0.572615320  | 1.385067104   |
|   |               |               |              | 1 | 1.079543765   | 1.759714730  | -1.694768628  |
|   |               |               |              | 6 | 2.025914761   | 4.630284096  | 1.089564982   |
|   |               |               |              | 1 | 1.400670572   | 6.178648092  | -0.142011018  |
|   |               |               |              | 1 | 1.438754220   | 5.138340707  | 3.012695657   |
|   |               |               |              | 7 | -3.357882455  | 4.367702890  | -0.501066515  |
|   |               |               |              | 1 | -2.785384298  | 4.541134383  | -2.342530792  |
|   |               |               |              | 1 | -5.379008650  | 4.260540309  | -0.565179249  |
|   |               |               |              | 1 | -2.980523072  | 6.092646663  | 0.356619640   |
|   |               |               |              | 6 | 4.913213871   | 4.499430020  | 0.985546905   |
|   |               |               |              | 1 | 5.583048035   | 3.154572505  | 2.418956980   |
|   |               |               |              | 1 | 5.678539668   | 6.354294343  | 1.509739887   |
|   |               |               |              | 6 | 5.916484516   | 3.753717689  | -1.622484719  |
|   |               |               |              | 1 | 4.947869556   | 4.855847459  | -3.086294815  |
|   |               |               |              | 1 | 5.499170657   | 1.761988071  | -0.2021704452 |
|   |               |               |              | 6 | 8.735167675   | 4.192918354  | -1.955904193  |
|   |               |               |              | 1 | 9.210301481   | 6.196007115  | -1.808180533  |
|   |               |               |              | 1 | 9.385601912   | 3.471613724  | -3.770925533  |
|   |               |               |              | 7 | 10.239210038  | 2.840311073  | 0.016701398   |
|   |               |               |              | 1 | 12.117592002  | 2.694564067  | -0.543090242  |
|   |               |               |              | 1 | 10.156897354  | 3.778890729  | 1.705422903   |
|   |               |               |              | 1 | 9.649048612   | 0.953585969  | 0.322260642   |

C4TB...A5\*

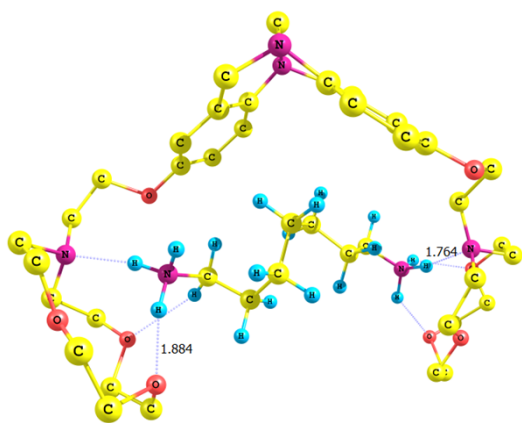

|   |              |               |              |
|---|--------------|---------------|--------------|
| 6 | 0.423837193  | 7.980978033   | 2.399609965  |
| 6 | 0.932780086  | 7.009133531   | 4.810250261  |
| 6 | 3.220325521  | 5.861058853   | 5.341442788  |
| 6 | 5.097872225  | 5.714185570   | 3.475791908  |
| 6 | 4.579376768  | 6.593391924   | 1.050848276  |
| 6 | 2.229585649  | 7.674141335   | 0.493915792  |
| 6 | -2.698732802 | 7.082878198   | -2.676050421 |
| 6 | -4.371427540 | 6.479341292   | -0.707679706 |
| 6 | -6.190850053 | 4.604854053   | -1.079375580 |
| 6 | -6.276694635 | 3.259195295   | -3.334716304 |
| 6 | -4.506773495 | 3.735583878   | -5.231662936 |
| 6 | -2.744639916 | 5.650532039   | -4.900726562 |
| 7 | -1.868317283 | 9.361044923   | 1.976736532  |
| 7 | -1.020013617 | 9.190344085   | -2.488576375 |
| 6 | -4.143399974 | 7.785383835   | 1.836280758  |
| 6 | -1.711628763 | 10.810086811  | -0.362901089 |
| 6 | 1.648967339  | 8.504073084   | -2.190800913 |
| 1 | -0.476441496 | 7.230000925   | 6.287598354  |
| 1 | 3.639462966  | 5.147713748   | 7.217770619  |
| 1 | 5.966467769  | 6.467821522   | -0.456467092 |
| 1 | -7.536316060 | 4.185317876   | 0.420532063  |
| 1 | -4.577868766 | 2.640158855   | -6.963950183 |
| 1 | -1.422799263 | 6.106568274   | -6.404751917 |
| 1 | -5.797246586 | 8.981941323   | 2.194236434  |
| 1 | -4.075946205 | 6.367212510   | 3.340417607  |
| 1 | -3.549236109 | 11.684213582  | -0.719403566 |
| 1 | -0.281903654 | 12.288982590  | -0.176402142 |
| 1 | 2.805950186  | 10.141749310  | -2.713593607 |
| 1 | 2.111761233  | 6.986766735   | -3.517445248 |
| 1 | 7.744843543  | -4.334577884  | 5.183873655  |
| 6 | 8.088450530  | -3.533114856  | 3.298076407  |
| 6 | 8.965444015  | -0.800763829  | 3.547601496  |
| 8 | 9.908311459  | -4.959891993  | 1.969990210  |
| 1 | 6.285302337  | -3.605608525  | 2.261559812  |
| 7 | 10.071340010 | 0.155853261   | 1.168228606  |
| 1 | 7.325668304  | 0.342777397   | 4.064587062  |
| 1 | 10.333599962 | -0.609211754  | 5.095292749  |
| 6 | 9.069960980  | -7.444401677  | 1.471009953  |
| 6 | 12.845476658 | -0.115244939  | 1.193216453  |
| 6 | 9.232668277  | 2.715165859   | 0.490733493  |
| 6 | 10.883075587 | -8.615578256  | -0.394727854 |
| 1 | 7.152055398  | -7.400174530  | 0.657705902  |
| 1 | 8.993453534  | -8.572579431  | 3.212972597  |
| 6 | 14.033985803 | -0.164007429  | -1.429233780 |
| 1 | 13.264755832 | -1.893851260  | 2.152239164  |
| 1 | 13.736839620 | 1.406218807   | 2.300903908  |
| 1 | 7.257511556  | 2.600244063   | -0.115445250 |
| 1 | 10.316348653 | 3.323678415   | -1.162304315 |
| 6 | 9.423900989  | 4.754930422   | 2.535976372  |
| 8 | 10.785335180 | -7.210973274  | -2.680882450 |
| 1 | 12.794274532 | -8.588116758  | 0.402817771  |
| 1 | 10.359751880 | -10.586675846 | -0.762264441 |

|   |               |               |              |
|---|---------------|---------------|--------------|
| 8 | 13.224587817  | -2.253560602  | -2.896800652 |
| 1 | 13.545725961  | 1.523480084   | -2.519082222 |
| 1 | 16.099446860  | -0.188978268  | -1.223860250 |
| 1 | 11.099458662  | 4.468824018   | 3.711586248  |
| 1 | 9.571637877   | 6.630094182   | 1.668329471  |
| 6 | 13.187955478  | -6.665823232  | -3.742156345 |
| 6 | 14.530955393  | -4.531158519  | -2.379420133 |
| 1 | 12.848715648  | -6.117823482  | -5.706997052 |
| 1 | 14.380871465  | -8.361268381  | -3.739472934 |
| 1 | 14.577907525  | -4.903092499  | -0.337811197 |
| 1 | 16.488594354  | -4.391039117  | -3.059908571 |
| 1 | -11.692864747 | -7.778786801  | -3.660607110 |
| 6 | -10.805645955 | -6.012826526  | -3.023669296 |
| 6 | -12.788422051 | -4.312262109  | -1.824407610 |
| 8 | -8.782346574  | -6.551096077  | -1.352917196 |
| 1 | -9.949951571  | -5.103040626  | -4.675427760 |
| 7 | -11.892867677 | -1.699846321  | -1.439871048 |
| 1 | -14.512883943 | -4.322638595  | -2.991251047 |
| 1 | -13.297521791 | -5.085237517  | 0.019741967  |
| 6 | -9.312303220  | -8.456699543  | 0.441568492  |
| 6 | -13.219306033 | -0.533760664  | 0.717600767  |
| 6 | -12.208468925 | -0.215744347  | -3.764753688 |
| 6 | -7.044176610  | -8.643362897  | 2.177965894  |
| 1 | -9.623287867  | -10.278886725 | -0.507228911 |
| 1 | -11.013495027 | -7.993476681  | 1.536916036  |
| 6 | -11.677678909 | -0.675505231  | 3.135828313  |
| 1 | -15.068650466 | -1.433806917  | 0.994058231  |
| 1 | -13.587657091 | 1.463318768   | 0.331399357  |
| 1 | -14.199008015 | 0.315676837   | -4.063084730 |
| 1 | -11.635413298 | -1.386257632  | -5.370228984 |
| 6 | -10.586144833 | 2.141303320   | -3.765913980 |
| 8 | -6.682955834  | -6.386565194  | 3.596664451  |
| 1 | -7.232164662  | -10.270479334 | 3.446274388  |
| 1 | -5.331410232  | -8.889049952  | 1.045836723  |
| 8 | -10.834808206 | -3.182326911  | 3.498967508  |
| 1 | -10.038447439 | 0.605728989   | 3.010547039  |
| 1 | -12.828523926 | -0.045903334  | 4.746394530  |
| 1 | -10.931093525 | 3.244684089   | -5.486097533 |
| 1 | -11.001168344 | 3.349000743   | -2.133833233 |
| 6 | -8.329944283  | -6.126559685  | 5.716232143  |
| 6 | -9.403114003  | -3.480593702  | 5.733504238  |
| 1 | -7.267385375  | -6.482655871  | 7.457232917  |
| 1 | -9.882677326  | -7.491370817  | 5.601646718  |
| 1 | -10.582095150 | -3.195853569  | 7.419041554  |
| 1 | -7.856095491  | -2.086450243  | 5.794177671  |
| 8 | 7.350219624   | 4.712271748   | 4.246771766  |
| 8 | -8.009219988  | 1.347822795   | -3.696065928 |
| 6 | -2.137731738  | -3.599395106  | -0.176247184 |
| 6 | -0.968441105  | -1.506207989  | 1.450349578  |
| 6 | -0.221302031  | 0.885837403   | -0.007124267 |
| 6 | 1.482958690   | 0.397295992   | -2.294242623 |
| 6 | 3.833441449   | -1.144778986  | -1.626815971 |
| 6 | 5.723063502   | -1.187012482  | -3.790769546 |
| 6 | -4.489563761  | -2.815283542  | -1.637462687 |
| 7 | -6.562988123  | -2.115058805  | 0.141196546  |
| 1 | -6.850457020  | -3.564745090  | 1.431199095  |
| 1 | -6.116389180  | -0.488596213  | 1.090530632  |
| 1 | 6.231029407   | 0.735120417   | -4.353443018 |
| 1 | 4.958837526   | -2.160049402  | -5.442554466 |
| 1 | 4.714229504   | -0.309780892  | 0.058035375  |
| 1 | 3.318062149   | -3.089832382  | -1.124740342 |
| 1 | 2.066853785   | 2.230740271   | -3.072322181 |
| 1 | 0.428703238   | -0.561214604  | -3.803627242 |
| 1 | 0.752641956   | 2.181127405   | 1.293150832  |
| 1 | -1.911754524  | 1.895680515   | -0.655489254 |
| 1 | -2.266605381  | -0.990339250  | 2.986744050  |
| 1 | -0.761483984  | -4.284458571  | -1.563368421 |
| 1 | -2.607676355  | -5.216917404  | 1.030458133  |
| 1 | -4.144996793  | -1.191052717  | -2.863628402 |
| 1 | -5.211106496  | -4.374294255  | -2.772772266 |
| 1 | -8.319864485  | -1.843954935  | -0.751082933 |
| 1 | 0.696585125   | -2.293174928  | 2.401246468  |
| 7 | 8.119391013   | -2.460627328  | -3.047903142 |
| 1 | 8.008860940   | -4.389211752  | -2.823409364 |
| 1 | 9.533669502   | -2.200047342  | -4.347301409 |
| 1 | 8.895425888   | -1.693292752  | -1.342589844 |

C4TB...A6\*

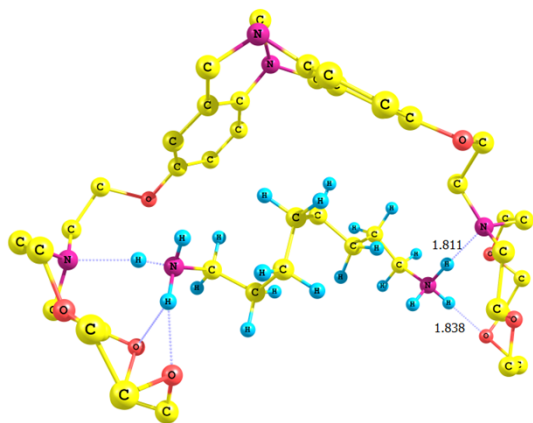

|   |              |              |              |
|---|--------------|--------------|--------------|
| 6 | -0.823157082 | 7.792795340  | 2.600393351  |
| 6 | -0.290694659 | 6.819677163  | 5.004971406  |
| 6 | 2.047200635  | 5.785840200  | 5.549900351  |
| 6 | 3.940435844  | 5.744167962  | 3.696457101  |
| 6 | 3.397819924  | 6.611081649  | 1.271819605  |
| 6 | 1.010765298  | 7.601156338  | 0.707747736  |
| 6 | -3.825625542 | 6.921546622  | -2.584345798 |
| 6 | -5.458927052 | 6.128793341  | -0.651694684 |
| 6 | -7.151611312 | 4.158421406  | -1.109930559 |
| 6 | -7.178118498 | 2.932667651  | -3.435247837 |
| 6 | -5.458188169 | 6.094614345  | -5.313096898 |
| 6 | -3.804643914 | 5.611979740  | -4.882842195 |
| 7 | -3.177629052 | 9.063169305  | 2.174352738  |
| 7 | -2.248815500 | 9.094614345  | -2.283692283 |
| 6 | -5.352121629 | 7.363929586  | 1.934960360  |
| 6 | -3.051470945 | 10.597326341 | -0.112153348 |
| 6 | 0.438800044  | 8.498498393  | -1.956939763 |
| 1 | -1.723120187 | 6.960635604  | 6.469902110  |
| 1 | 2.487973552  | 5.084245411  | 7.425636698  |
| 1 | 4.795773070  | 6.545086748  | -0.230353819 |
| 1 | -8.456450100 | 3.587115666  | 0.375176749  |
| 1 | -5.481662346 | 2.621019711  | -7.102746777 |
| 1 | -2.518443494 | 6.225454715  | -6.361354360 |
| 1 | -7.080587850 | 8.452398527  | 2.286859464  |
| 1 | -5.235852458 | 5.909292219  | 3.400176412  |
| 1 | -4.921453076 | 11.398727008 | -0.471520649 |
| 1 | -1.695097440 | 12.132620993 | 0.152287348  |
| 1 | 1.541912472  | 10.196863169 | -2.397257256 |
| 1 | 0.981200535  | 7.050856791  | -3.330689298 |
| 1 | 9.418071184  | -3.773438869 | 5.764864241  |
| 6 | 9.337109653  | -3.086536700 | 3.806805761  |
| 6 | 9.357645306  | -0.207387979 | 3.788791003  |
| 8 | 11.405460101 | -4.000258900 | 2.389868428  |
| 1 | 7.556392508  | -3.796958399 | 2.989196915  |
| 7 | 9.826688524  | 0.829417744  | 1.235816546  |
| 1 | 7.516577872  | 0.444618510  | 4.465433849  |
| 1 | 10.778842081 | 0.499932679  | 5.125379077  |
| 6 | 11.491444524 | -6.666703844 | 2.264154406  |
| 6 | 12.544201423 | 1.336225247  | 0.849838123  |
| 6 | 8.288513930  | 3.083089840  | 0.706562878  |
| 6 | 13.546330674 | -7.377785057 | 0.413456928  |
| 1 | 9.660558933  | -7.417782997 | 1.616864674  |
| 1 | 11.892325326 | -7.487948523 | 4.128367204  |
| 6 | 13.316058113 | 1.279113948  | -1.923123116 |
| 1 | 13.597555476 | -0.114904789 | 1.869384978  |
| 1 | 13.076832031 | 3.174049911  | 1.66969287   |
| 1 | 6.325158548  | 2.485592498  | 0.421743377  |
| 1 | 8.938940608  | 3.886873451  | -1.084370126 |
| 6 | 8.302242790  | 5.135861387  | 2.760101654  |
| 8 | 12.876250846 | -6.468027502 | -2.028989345 |
| 1 | 15.337728550 | -6.546020273 | 1.035216463  |
| 1 | 13.766205962 | -9.435715555 | 0.344051072  |
| 8 | 13.200442788 | -1.187176889 | -2.963566561 |
| 1 | 12.061771386 | 2.450596662  | -3.078743470 |

|   |               |               |              |
|---|---------------|---------------|--------------|
| 1 | 15.234494709  | 2.048005658   | -2.115073923 |
| 1 | 9.997395032   | 5.002664051   | 3.934171403  |
| 1 | 8.264028751   | 7.031026007   | 1.928151677  |
| 6 | 14.881594050  | -5.312658481  | -3.394762347 |
| 6 | 15.384314075  | -2.650512664  | -2.473779820 |
| 1 | 14.273523690  | -5.260634325  | -5.368974205 |
| 1 | 16.603160882  | -6.457860776  | -3.263265764 |
| 1 | 15.820379685  | -2.665409374  | -0.443667978 |
| 1 | 17.021822115  | -1.858044732  | -3.477254556 |
| 1 | -11.551985675 | -8.526105400  | -3.183895383 |
| 6 | -10.744672056 | -6.679591775  | -2.684180022 |
| 6 | -12.730825093 | -5.101137672  | -1.328543510 |
| 8 | -8.526626964  | -7.017399193  | -1.217835803 |
| 1 | -10.136070684 | -5.764019534  | -4.438692337 |
| 7 | -12.066183896 | -2.395892874  | -1.151196506 |
| 1 | -14.568326614 | -5.326918354  | -2.281180837 |
| 1 | -12.944908370 | -5.820830366  | 0.592508466  |
| 6 | -8.742588629  | -8.906201105  | 0.660922216  |
| 6 | -13.284441108 | -1.263336625  | 1.087242509  |
| 6 | -12.763466330 | -1.071589909  | -3.489535885 |
| 6 | -6.333256024  | -8.858130256  | 2.204522213  |
| 1 | -8.983335941  | -10.774406894 | -0.215152863 |
| 1 | -10.378800318 | -8.548423063  | 1.887898624  |
| 6 | -11.524488272 | -1.207818366  | 3.358598661  |
| 1 | -15.027263578 | -2.290612460  | 1.550342539  |
| 1 | -13.835840475 | 0.687801678   | 0.684358598  |
| 1 | -14.818698300 | -0.762965530  | -3.605275933 |
| 1 | -12.228165539 | -2.261176198  | -5.093888683 |
| 6 | -11.408848380 | 1.436684970   | -3.758810500 |
| 8 | -6.022048389  | -6.502528229  | 3.464468670  |
| 1 | -6.316964696  | -10.417707886 | 3.568035103  |
| 1 | -4.704329229  | -9.073477760  | 0.951444910  |
| 8 | -10.421944652 | -3.615268804  | 3.688319941  |
| 1 | -10.024255597 | 0.208523704   | 3.062949141  |
| 1 | -12.578307198 | -0.639925470  | 5.056113061  |
| 1 | -12.014923189 | 2.390446684   | -5.495553721 |
| 1 | -11.811276868 | 2.696419777   | -2.165206464 |
| 6 | -7.464221123  | -6.259358289  | 5.725637309  |
| 6 | -8.736526388  | -3.704427966  | 5.758257759  |
| 1 | -6.213420940  | -6.455795306  | 7.364188478  |
| 1 | -8.912909633  | -7.736048758  | 5.823804795  |
| 1 | -9.747231216  | -3.435646569  | 7.552167081  |
| 1 | -7.313343511  | -2.192471430  | 5.596954528  |
| 8 | 6.241071411   | 4.858326780   | 4.463530895  |
| 8 | -8.763814032  | 0.918382264   | -3.884840106 |
| 6 | -2.332178873  | -3.812971937  | -1.172488049 |
| 1 | -1.080065330  | -2.080707366  | 0.780316994  |
| 6 | -0.470065560  | 0.595938319   | -0.153642282 |
| 6 | 1.195368851   | 0.676223327   | -2.523541975 |
| 6 | 3.512565976   | -1.049865619  | -2.368750740 |
| 6 | 5.507642299   | -0.432172775  | -4.367923988 |
| 6 | 7.548238341   | -2.453261176  | -4.620295004 |
| 6 | -4.816180221  | -2.825748845  | -2.225970603 |
| 7 | 8.507485929   | -3.249646509  | -2.091994699 |
| 1 | 9.045252813   | -1.684424267  | -0.951254048 |
| 1 | 7.152229252   | -4.251737965  | -1.143964524 |
| 7 | -6.658759436  | -2.335440540  | -0.146963990 |
| 1 | -6.675732955  | -3.832925553  | 1.117727569  |
| 1 | -6.200001996  | -0.707216723  | 0.795527398  |
| 1 | 10.109998134  | -4.374985894  | -2.217338335 |
| 1 | 6.814357584   | -4.145403084  | -5.546549867 |
| 1 | 6.379131012   | 1.398092986   | -3.934267779 |
| 1 | 4.605657187   | -0.225565253  | -6.220161593 |
| 1 | 4.344060529   | -0.881022381  | -0.469706512 |
| 1 | 2.924917885   | -3.032496206  | -2.563683534 |
| 1 | 1.823067794   | 2.634620068   | -2.811379368 |
| 1 | 0.092709957   | 0.172242855   | -4.209018820 |
| 1 | 0.496837308   | 1.615373680   | 1.375378479  |
| 1 | -2.213230070  | 1.665175519   | -0.533497992 |
| 1 | -2.271991100  | -1.967979542  | 2.475852850  |
| 1 | -1.070251983  | -4.118340318  | -2.785406974 |
| 1 | -2.655378708  | -5.670721872  | -0.317105470 |
| 1 | -4.564920364  | -1.060077698  | -3.259667726 |
| 1 | -5.692465059  | -4.208506704  | -3.475578369 |
| 1 | -8.539220098  | -2.173887865  | -0.797305630 |
| 1 | 9.182104879   | -1.768757069  | -5.674728091 |
| 1 | 0.665958336   | -2.996723693  | 1.415916881  |

C4TB $\cdots$ (CH<sub>3</sub>-NH<sub>3</sub>)<sup>+</sup>

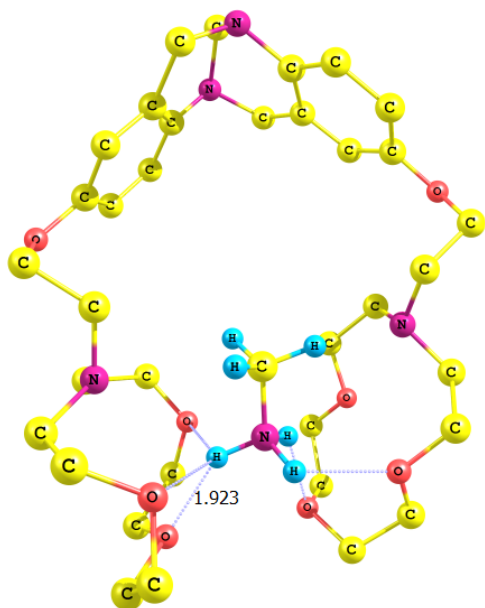

|   |              |              |              |
|---|--------------|--------------|--------------|
| 6 | 8.593298386  | -3.245804696 | 2.095050386  |
| 6 | 7.029255334  | -4.247601355 | 3.976920784  |
| 6 | 5.077034217  | -5.885466554 | 3.373950795  |
| 6 | 4.671485792  | -6.583831800 | 0.855943828  |
| 6 | 6.210794221  | -5.589376727 | -1.032098415 |
| 6 | 8.160494443  | -3.913730237 | -0.429319288 |
| 6 | 9.751656954  | 1.573047597  | -1.346106624 |
| 6 | 8.968214353  | 2.443410034  | 1.031790390  |
| 6 | 7.465628969  | 4.602100723  | 1.184674891  |
| 6 | 6.677581107  | 5.867996037  | -0.985072584 |
| 6 | 7.446435022  | 4.992784563  | -3.358194260 |
| 6 | 8.984932759  | 2.873099709  | -3.510859553 |
| 7 | 10.598384588 | -1.564209349 | 2.804209748  |
| 7 | 11.285521083 | -0.644133890 | -1.622021736 |
| 6 | 9.685915276  | 0.990543341  | 3.400930413  |
| 6 | 12.459284696 | -1.339434001 | 0.778177824  |
| 6 | 9.813681540  | -2.825958604 | -2.506865143 |
| 1 | 7.379599194  | -3.728866378 | 5.932796631  |
| 1 | 3.856303354  | -6.669595125 | 4.824504464  |
| 1 | 5.910972185  | -6.077927587 | -3.003188446 |
| 1 | 6.824131247  | 5.294844034  | 3.010537590  |
| 1 | 6.863324164  | 5.944291834  | -5.076703515 |
| 1 | 9.616904373  | 2.194657843  | -5.343190784 |
| 1 | 11.181389622 | 1.986307994  | 4.434022824  |
| 1 | 8.057557289  | 0.850047883  | 4.666430775  |
| 1 | 13.839587801 | 0.100573107  | 1.317991280  |
| 1 | 13.430947784 | -3.145590637 | 0.527316699  |
| 1 | 11.138570321 | -4.265079431 | -3.193213622 |
| 1 | 8.652220043  | -2.250540820 | -4.116439254 |
| 1 | -2.482344059 | -4.792978165 | 5.375758322  |
| 6 | -2.542843636 | -4.165984090 | 3.395616504  |
| 6 | -2.716993224 | -6.461929356 | 1.667021781  |
| 8 | -4.522581053 | -2.394188341 | 3.053449488  |

|   |               |              |              |
|---|---------------|--------------|--------------|
| 1 | -0.792371556  | -3.123121795 | 3.013922089  |
| 7 | -2.690933903  | -5.746664290 | -1.012842107 |
| 1 | -1.164785525  | -7.749535733 | 2.157900783  |
| 1 | -4.460450642  | -7.489443296 | 2.077961594  |
| 6 | -6.890895266  | -2.994703576 | 4.149479223  |
| 6 | -4.462516112  | -7.182852262 | -2.565091380 |
| 6 | -0.139580831  | -5.669130723 | -2.074705596 |
| 6 | -8.674747466  | -4.382607159 | 2.364561217  |
| 1 | -7.756006154  | -1.181392437 | 4.628592791  |
| 1 | -6.644338937  | -4.099529986 | 5.889183645  |
| 6 | -5.263262934  | -5.825301458 | -4.986901846 |
| 1 | -6.136628145  | -7.55421058  | -1.417421103 |
| 1 | -3.722790433  | -9.052743687 | -3.132899238 |
| 1 | 0.941030630   | -4.170143377 | -1.133697643 |
| 1 | -0.281266816  | -5.103531955 | -4.059035047 |
| 6 | 1.414686670   | -8.116858781 | -1.894106373 |
| 8 | -8.614444420  | -3.121925599 | 0.016688170  |
| 1 | -8.140321618  | -6.371445497 | 2.105710331  |
| 1 | -10.588238649 | -4.355104087 | 3.175463426  |
| 8 | -6.334023253  | -3.400648844 | -4.601033027 |
| 1 | -3.630057799  | -5.534943170 | -6.224812208 |
| 1 | -6.596111240  | -7.044977854 | -6.012936131 |
| 1 | 0.188660794   | -9.780142683 | -1.905121586 |
| 1 | 2.706560047   | -8.296473456 | -3.500348897 |
| 6 | -9.998835003  | -4.315665506 | -1.927182247 |
| 6 | -8.998614375  | -3.302171443 | -4.424113101 |
| 1 | -12.027089245 | -3.902061179 | -1.758590343 |
| 1 | -9.770580670  | -6.376022413 | -1.816848706 |
| 1 | -9.887749350  | -4.323513538 | -5.997820212 |
| 1 | -9.492579300  | -1.300590684 | -4.598493236 |
| 1 | -5.681020879  | 9.051747801  | -3.456312613 |
| 6 | -4.567607554  | 7.375687461  | -2.940770796 |
| 6 | -2.487368840  | 8.104679497  | -1.080872243 |
| 8 | -6.198558245  | 5.471654357  | -1.984786765 |
| 1 | -3.742732711  | 6.609384675  | -4.677069932 |
| 7 | -0.543982192  | 6.146352675  | -0.898863284 |
| 1 | -1.684456393  | 9.935878782  | -1.670876822 |
| 1 | -3.314598281  | 8.385507896  | 0.788624229  |
| 6 | -8.142715901  | 6.463603654  | -0.442798704 |
| 6 | 0.495864099   | 5.806750018  | 1.637014822  |
| 6 | 1.377069784   | 6.384868220  | -2.866699207 |
| 6 | -9.665007348  | 4.301876175  | 0.661929440  |
| 1 | -9.402739837  | 7.669562529  | -1.574778586 |
| 1 | -7.340270216  | 7.629602383  | 1.076212179  |
| 6 | -1.064138719  | 4.049798067  | 3.284270069  |
| 1 | 0.772535102   | 7.625911748  | 2.612447913  |
| 1 | 2.360948061   | 4.930880919  | 1.474568307  |
| 1 | 0.409849442   | 6.699486810  | -4.671013360 |
| 1 | 2.370659363   | 4.573097208  | -3.045499411 |
| 6 | 3.337104918   | 8.493112673  | -2.534230265 |
| 8 | -8.248865589  | 2.782615849  | 2.350480869  |
| 1 | -11.355314332 | 5.058327819  | 1.598386933  |
| 1 | -10.284408504 | 3.040026764  | -0.857257187 |
| 8 | -3.594821969  | 4.883322185  | 3.447096419  |
| 1 | -1.027238040  | 2.117334035  | 2.509238639  |
| 1 | -0.203686005  | 3.979783719  | 5.177352211  |
| 1 | 4.268411018   | 8.897665213  | -4.339659357 |
| 1 | 2.443636801   | 10.243310744 | -1.896086806 |
| 6 | -7.745421799  | 3.904803171  | 4.736439453  |
| 6 | -4.971997577  | 3.553410513  | 5.310953948  |
| 1 | -8.906420314  | 2.994561847  | 6.194251560  |
| 1 | -8.204097981  | 5.924829546  | 4.718494615  |
| 1 | -4.522316491  | 4.267498280  | 7.210092662  |
| 1 | -4.492974716  | 1.533300990  | 5.232651262  |
| 8 | 2.775655988   | -8.292128976 | 0.430060061  |
| 8 | 5.168795531   | 7.939766889  | -0.631410365 |
| 1 | -5.003941505  | 1.609857570  | 0.314588354  |
| 1 | -5.616052099  | -1.266114523 | -0.862703377 |
| 1 | -5.986009425  | 1.386172594  | -2.580751539 |
| 7 | -4.870687477  | 0.494677351  | -1.277046587 |
| 6 | -2.254477119  | 0.279428113  | -2.234268390 |
| 1 | -1.143692404  | -0.704933934 | -0.809014372 |
| 1 | -2.303284962  | -0.831109049 | -3.966574534 |
| 1 | -1.522571126  | 2.181475115  | -2.531847321 |

C5TB<sup>+</sup>·(NH<sub>4</sub>)<sup>+</sup>

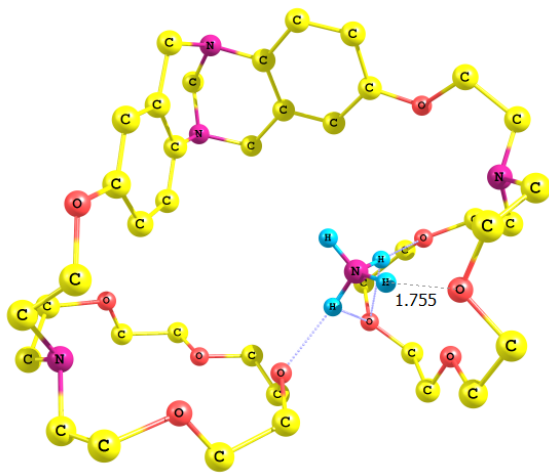

|   |               |               |              |
|---|---------------|---------------|--------------|
| 6 | -7.037560679  | -2.335552034  | -5.732757797 |
| 1 | -10.235674361 | -0.041449250  | -6.102813388 |
| 1 | -10.993749280 | -2.999913551  | -4.801593426 |
| 1 | -12.611749679 | 1.887471545   | -3.571517868 |
| 1 | -12.272464495 | 1.831938168   | -0.276410220 |
| 6 | -9.726455568  | 4.338293085   | -2.128158386 |
| 8 | -3.093317037  | -4.460747329  | 4.248655822  |
| 1 | -2.258422867  | -0.966645866  | 5.436225774  |
| 1 | -3.316905637  | -2.989569191  | 7.897068530  |
| 8 | -5.777345881  | -4.143692882  | -4.202882879 |
| 1 | -7.271888592  | -3.096850825  | -7.651079119 |
| 1 | -5.759761981  | -0.712695039  | -5.818560805 |
| 1 | -10.998363991 | 5.976893387   | -2.171302720 |
| 1 | -8.519544271  | 4.388427515   | -3.816010616 |
| 6 | -4.674615178  | -6.606034191  | 4.490002177  |
| 6 | -6.839884003  | -6.598363793  | -4.167614923 |
| 6 | -4.437872196  | -8.178524319  | 2.116141618  |
| 1 | -6.662140156  | -6.053045565  | 4.687748774  |
| 1 | -4.130003707  | -7.725723295  | 6.151490840  |
| 6 | -5.386996522  | -8.118115448  | -2.231231600 |
| 1 | -6.684505063  | -7.478953427  | -6.039836380 |
| 1 | -8.842424743  | -6.522980734  | -3.636361925 |
| 8 | -5.534175941  | -6.819110245  | 0.097415375  |
| 1 | -2.442601231  | -8.583078748  | 1.699997499  |
| 1 | -5.416582072  | -9.990847131  | 2.389838192  |
| 1 | -6.213504088  | -10.017256052 | -2.077164130 |
| 1 | -3.402018895  | -8.321693739  | -2.816016756 |
| 1 | 8.146262917   | -7.404394288  | -5.291332923 |
| 6 | 7.755435457   | -5.446598480  | -4.714465720 |
| 6 | 9.843144258   | -4.605307588  | -2.921291501 |
| 8 | 5.298816238   | -5.266957348  | -3.674602420 |
| 1 | 7.756227252   | -4.305995778  | -6.438177390 |
| 7 | 9.650756924   | -1.985856350  | -2.065581999 |
| 1 | 11.663417147  | -4.949611883  | -3.896728372 |
| 1 | 9.818058146   | -5.816748558  | -1.242107444 |
| 6 | 4.633842450   | -7.381906549  | -2.190001558 |
| 6 | 11.695612409  | -1.457543765  | -0.276495258 |
| 6 | 9.703193041   | -0.197952577  | -4.179446498 |
| 6 | 1.930965479   | -7.072664229  | -1.284117942 |
| 1 | 5.914717622   | -7.588483835  | -0.566934804 |
| 1 | 4.766799791   | -9.116731698  | -3.329111377 |
| 6 | 11.155390772  | 0.775798659   | 1.465208494  |
| 1 | 13.508891423  | -1.116315944  | -1.257162891 |
| 1 | 11.978077311  | -3.149162220  | 0.880772937  |
| 1 | 10.326810176  | 1.640771597   | -3.469236449 |
| 1 | 11.115383383  | -0.787819206  | -5.598417176 |
| 6 | 7.112167061   | 0.226549800   | -5.448010105 |
| 8 | 1.688222617   | -5.306588681  | 0.723668678  |
| 1 | 0.788142349   | -6.356898386  | -2.853401205 |
| 1 | 1.177775502   | -8.920421293  | -0.709941708 |
| 8 | 8.981742902   | 0.422572967   | 2.970426266  |
| 1 | 12.825258480  | 1.117990241   | 2.656848915  |
| 1 | 10.802091380  | 2.499759773   | 0.376595933  |
| 1 | 5.659143521   | -0.898596833  | -4.492868891 |
| 1 | 7.165833390   | -0.312859255  | -7.440036410 |
| 6 | 2.300711155   | -6.350170961  | 3.125799537  |
| 6 | 9.318939938   | -1.190230686  | 5.062638284  |
| 6 | 3.147586188   | -4.277598866  | 4.887538164  |
| 1 | 3.841332944   | -7.722928391  | 2.941808256  |
| 1 | 0.650328412   | -7.313226348  | 3.921642519  |
| 6 | 6.732885827   | -1.933276614  | 6.011059633  |
| 1 | 10.382583549  | -0.226487439  | 6.566635294  |
| 1 | 10.352251557  | -2.913347093  | 4.542604590  |
| 8 | 5.599418731   | -3.510651683  | 4.184966387  |
| 1 | 1.818598592   | -2.678444704  | 4.804724702  |
| 1 | 3.141707251   | -5.012845894  | 6.833957822  |
| 1 | 6.906780303   | -2.932531591  | 7.827093867  |
| 1 | 5.584720442   | -0.226659404  | 6.324945009  |
| 8 | -8.209536612  | 4.383873276   | 0.083648721  |
| 8 | 6.390223704   | 2.816328561   | -5.502530590 |
| 1 | -1.353646630  | -3.250474209  | 0.322345680  |
| 7 | -2.755753394  | -2.115230770  | -0.436868744 |
| 1 | -2.012554398  | -0.417533067  | -0.978271460 |
| 1 | -3.610935662  | -3.003953785  | -1.964047022 |
| 1 | -4.168293335  | -1.855469036  | 0.896865844  |
| 6 | -1.836418708  | 8.968894655   | 0.418666903  |
| 6 | -3.742549408  | 9.520639841   | -1.315663138 |
| 6 | -5.903263993  | 8.035734734   | -1.493951226 |
| 6 | -6.178451561  | 5.959602394   | 0.113927800  |
| 6 | -4.296469669  | 5.408684907   | 1.872924435  |
| 6 | -2.123428402  | 6.879687301   | 2.033611615  |
| 6 | 3.429591887   | 6.241485261   | 0.928885361  |
| 6 | 3.349531756   | 7.440316090   | -1.438595483 |
| 6 | 4.401164268   | 6.241409672   | -3.529428001 |
| 6 | 5.464773864   | 3.837137753   | -3.323504560 |
| 6 | 5.515146400   | 2.617474585   | -0.981017232 |
| 6 | 4.520933212   | 3.851713209   | 1.116049492  |
| 7 | 0.394742972   | 10.513755099  | 0.458120602  |
| 7 | 2.372348778   | 7.385243805   | 3.153497251  |
| 6 | 2.053446179   | 9.984834023   | -1.709353533 |
| 6 | 1.871057386   | 10.070688054  | 2.750571765  |
| 6 | -0.030866784  | 6.192809699   | 3.868803891  |
| 1 | -3.518208698  | 11.150071193  | -2.545731137 |
| 1 | -7.355293538  | 8.509625099   | -2.859580609 |
| 1 | -4.530678529  | 3.742235714   | 3.055055755  |
| 1 | 4.341832542   | 7.137096327   | -5.378067567 |
| 1 | 6.357164837   | 0.760329362   | -0.740162206 |
| 1 | 4.633861347   | 2.939523577   | 2.951982541  |
| 1 | 3.449966913   | 11.511014526  | -1.838448274 |
| 1 | 0.934720835   | 10.032088511  | -3.445945576 |
| 1 | 3.658683369   | 11.092723678  | 2.577463416  |
| 1 | 0.841528998   | 10.791735682  | 4.391059904  |
| 1 | -0.514330502  | 6.808367153   | 5.788253380  |
| 1 | 0.220374176   | 4.142056379   | 3.929847710  |
| 1 | -10.459565317 | -2.572865713  | 3.730026194  |
| 6 | -9.485016617  | -1.263106079  | 2.446305094  |
| 6 | -9.986721859  | -2.158564077  | -0.239195846 |
| 8 | -6.856619416  | -1.335303060  | 2.998745700  |
| 1 | -10.212912611 | 0.642996275   | 2.805056345  |
| 7 | -9.498900434  | -0.295226222  | -2.223803087 |
| 1 | -11.967377683 | -2.822222616  | -0.320849017 |
| 1 | -8.767393173  | -3.798562776  | -0.544328012 |
| 6 | -6.312578642  | -1.435847821  | 5.613678603  |
| 6 | -9.591810702  | -1.456666932  | -4.736042611 |
| 6 | -11.204506640 | 1.888231215   | -2.046333250 |
| 6 | -3.627744775  | -2.440874022  | 5.918266528  |
| 1 | -7.680262157  | -2.676254511  | 6.560059047  |
| 1 | -6.461232047  | 0.438316274   | 6.493444317  |



**Table S2.** The hydrogen bonding distances and the corresponding hydrogen bond donor length of **C4TB...Am** (**m = 1-6**), **C4TB...Am\*** (**m = 2-6**) and **C5TB...Am** (**m = 1-6**) complexes obtained at PCM-M06-2X/6-31G(d) level of theory

| <b>C4TB...Am</b>  |              |            |                |              |            |                |
|-------------------|--------------|------------|----------------|--------------|------------|----------------|
| <b>m=</b>         | <b>H...N</b> | <b>N-H</b> | <b>N-H...N</b> | <b>H...O</b> | <b>N-H</b> | <b>N-H...O</b> |
| 1                 | 1.712        | 1.079      | 176            | 1.896        | 1.038      | 160            |
| 2                 | 1.772        | 1.071      | 174            | 1.815        | 1.039      | 175            |
| 3                 | 1.749        | 1.071      | 174            | 1.857        | 1.038      | 173            |
| 4                 | 1.771        | 1.069      | 174            | 1.845        | 1.038      | 169            |
| 5                 | 1.829        | 1.064      | 168            | 1.825        | 1.042      | 160            |
| 6                 | 1.799        | 1.067      | 173            | 1.848        | 1.038      | 179            |
| <b>C4TB...Am*</b> |              |            |                |              |            |                |
| 2                 | 1.732        | 1.077      | 177            | 1.826        | 1.040      | 167            |
| 3                 | 1.719        | 1.077      | 171            | 1.848        | 1.038      | 169            |
| 4                 | 1.760        | 1.070      | 175            | 1.820        | 1.040      | 171            |
| 5                 | 1.823        | 1.067      | 171            | 1.842        | 1.039      | 172            |
| 6                 | 1.811        | 1.064      | 175            | 1.838        | 1.038      | 173            |
| <b>C5TB...Am</b>  |              |            |                |              |            |                |
| 1                 | 1.978        | 1.049      | 164            | 1.898        | 1.035      | 152            |
| 2                 | 1.963        | 1.048      | 163            | 1.887        | 1.035      | 158            |
| 3                 | 1.890        | 1.050      | 159            | 1.850        | 1.035      | 156            |
| 4                 | 1.924        | 1.046      | 155            | 1.798        | 1.035      | 166            |
| 5                 | -            | -          | -              | 1.737        | 1.041      | 171            |
| 6                 | 1.852        | 1.055      | 167            | 1.832        | 1.037      | 176            |

The hyphen indicates that the H...N type hydrogen bond was not seen in the **C5TB...Am** complexes.

**Table S3.** The binding energies of **C4TB...Am**, **C4TB...Am\*** and **C5TB...Am** complexes. The values are expressed in kcal/mol

| <b>Method</b>                           | <b>C4TB...A1</b>  | <b>C4TB...A2</b>  | <b>C4TB...A3</b>  | <b>C4TB...A4</b>  | <b>C4TB...A5</b>  | <b>C4TB...A6</b>  |
|-----------------------------------------|-------------------|-------------------|-------------------|-------------------|-------------------|-------------------|
| PCM-B3LYP/cc-pVTZ//B3LYP/6-31G(d)       | 40.49             | 36.25             | 36.82             | 36.08             | 33.84             | 34.92             |
| M06-2X/cc-pVTZ//B3LYP/6-31G(d)          | 150.14            | 133.23            | 127.57            | 122.07            | 117.65            | 123.10            |
| M06-2X/cc-pVTZ//PCM-M06-2X/6-31G(d)     | 142.83            | 128.87            | 122.66            | 117.22            | 113.57            | 120.57            |
| PCM-M06-2X/cc-pVTZ//PCM-M06-2X/6-31G(d) | 52.32             | 48.69             | 49.07             | 47.99             | 46.21             | 49.37             |
| HF/6-31G(d)//B3LYP/6-31G(d)             | 132.42            | 119.68            | 110.28            | 105.35            | 103.65            | 105.74            |
|                                         | <b>C4TB...A1*</b> | <b>C4TB...A2*</b> | <b>C4TB...A3*</b> | <b>C4TB...A4*</b> | <b>C4TB...A5*</b> | <b>C4TB...A6*</b> |
| PCM-M06-2X/cc-pVTZ//PCM-M06-2X/6-31G(d) | -                 | 51.70             | 54.86             | 52.05             | 57.89             | 59.88             |
|                                         | <b>C5TB...A1</b>  | <b>C5TB...A2</b>  | <b>C5TB...A3</b>  | <b>C5TB...A4</b>  | <b>C5TB...A5</b>  | <b>C6TB...A6</b>  |
| PCM-B3LYP/cc-pVTZ//B3LYP/6-31G(d)       | 46.23             | 41.65             | 42.07             | 43.32             | 41.28             | 40.43             |
| M06-2X/cc-pVTZ//B3LYP/6-31G(d)          | 182.04            | 164.57            | 164.58            | 160.57            | 148.15            | 149.00            |
| M06-2X/cc-pVTZ//PCM-M06-2X/6-31G(d)     | 173.60            | 161.54            | 161.83            | 157.15            | 144.65            | 148.25            |
| PCM-M06-2X/cc-pVTZ//PCM-M06-2X/6-31G(d) | 63.72             | 60.63             | 65.65             | 64.66             | 59.45             | 63.01             |
| HF/6-31G(d)//B3LYP/6-31G(d)             | 166.50            | 148.75            | 148.56            | 144.06            | 134.51            | 132.45            |

**Table S4.** The relative energies (B3LYP/cc-pVTZ//B3LYP/6-31G(d)) of extended and folded conformations of bisammonium ions **A<sub>m</sub>** (**m** = **1-6**) showed in Figure S1

|           | Extended | Folded |
|-----------|----------|--------|
| <b>A1</b> | 0.00     | *      |
| <b>A2</b> | 0.00     | 3.12   |
| <b>A3</b> | 0.00     | 5.92   |
| <b>A4</b> | 0.00     | 5.02   |
| <b>A5</b> | 0.00     | 6.53   |
| <b>A6</b> | 0.00     | 7.60   |

\* The initial folded bisammonium ion collapsed to the extended structure upon geometry optimization.

**Table S5.** The binding energies of  $\text{C4-NH}_4^+$  calculated using various methods (A/cc-pVTZ//A/6-31G(d)) in three different solvents

| A                  | Water (80) | DMSO (47) | Methanol (33) |
|--------------------|------------|-----------|---------------|
| B3LYP              | 19.17      | 19.57     | 20.00         |
| B3LYP <sup>1</sup> | 18.68      | 19.07     | 19.50         |
| B3LYPD             | 28.91      | 29.32     | 29.76         |
| BP86               | 21.45      | 21.87     | 22.32         |
| M052X              | 22.91      | 23.41     | 23.89         |
| M062X              | 24.54      | 25.02     | 25.48         |
| MP2                | 24.03      | 24.46     | 24.92         |
| MPW1PW91           | 19.79      | 20.20     | 20.65         |
| PBE0               | 21.17      | 21.61     | 22.05         |
| PM6                | 8.23       | 8.94      | 9.67          |

<sup>1</sup>-B3LYP/cc-pVTZ geometry has been taken for the binding energy calculations.

**Table S6.** The percentage contribution of various energy terms to the total host-guest binding energy.

|                   | <b>C4-NH<sub>4</sub><sup>+</sup></b> | <b>C4-Me-NH<sub>4</sub><sup>+</sup></b> | <b>C4-Et-NH<sub>4</sub><sup>+</sup></b> | <b>C4-<i>n</i>-Pr-NH<sub>4</sub><sup>+</sup></b> | <b>C5-NH<sub>4</sub><sup>+</sup></b> | <b>TB1- NH<sub>4</sub><sup>+</sup></b> | <b>TB2- NH<sub>4</sub><sup>+</sup></b> |
|-------------------|--------------------------------------|-----------------------------------------|-----------------------------------------|--------------------------------------------------|--------------------------------------|----------------------------------------|----------------------------------------|
| E <sub>es</sub>   | 68.44                                | 69.72                                   | 69.45                                   | 69.36                                            | 71.58                                | 52.15                                  | 50.65                                  |
| E <sub>x</sub>    | 44.04                                | 45.96                                   | 47.05                                   | 49.30                                            | 38.35                                | 33.24                                  | 31.77                                  |
| POL <sub>h</sub>  | 16.22                                | 15.11                                   | 14.82                                   | 14.37                                            | 15.97                                | 28.41                                  | 30.18                                  |
| POL <sub>g</sub>  | 2.65                                 | 3.19                                    | 3.83                                    | 3.68                                             | 2.05                                 | 0.28                                   | 0.45                                   |
| CT <sub>h-g</sub> | 12.12                                | 11.24                                   | 11.20                                   | 11.88                                            | 9.94                                 | 18.71                                  | 18.35                                  |
| CT <sub>g-h</sub> | 0.57                                 | 0.73                                    | 0.70                                    | 0.71                                             | 0.46                                 | 0.45                                   | 0.37                                   |
